# Supplementary material
Source: PubMed Central journal article supplement (PMC9438251)
Supplement: 12889_2022_13971_MOESM1_ESM.pdf [file 12889_2022_13971_MOESM1_ESM.pdf]

## Supplementary Appendix

### 1. Supplement 1. Full search strategy

#### 2. Initial search strategies

#### 3. Supplemental Table 1. Initial search strategy for Medline (includes Medline in Process, Pubmed Not 4. Medline, In Data Review, Publisher)

|                             |                                                                                                                                                                                                                                                                                                                                                                                                                                                                                                                                                                                                                                                                                                                                                                                                                                                                                                                                                                                                                                                                                                               |
|-----------------------------|---------------------------------------------------------------------------------------------------------------------------------------------------------------------------------------------------------------------------------------------------------------------------------------------------------------------------------------------------------------------------------------------------------------------------------------------------------------------------------------------------------------------------------------------------------------------------------------------------------------------------------------------------------------------------------------------------------------------------------------------------------------------------------------------------------------------------------------------------------------------------------------------------------------------------------------------------------------------------------------------------------------------------------------------------------------------------------------------------------------|
|                             | Ovid MEDLINE®                                                                                                                                                                                                                                                                                                                                                                                                                                                                                                                                                                                                                                                                                                                                                                                                                                                                                                                                                                                                                                                                                                 |
| <b>Search Platform:</b>     | Ovid                                                                                                                                                                                                                                                                                                                                                                                                                                                                                                                                                                                                                                                                                                                                                                                                                                                                                                                                                                                                                                                                                                          |
| <b>Date of Search:</b>      | October 27, 2020<br><br>[Last Database Update: October 26, 2020]                                                                                                                                                                                                                                                                                                                                                                                                                                                                                                                                                                                                                                                                                                                                                                                                                                                                                                                                                                                                                                              |
| <b>Date Range Searched:</b> | 1946 to current, restricted to 2000-2020                                                                                                                                                                                                                                                                                                                                                                                                                                                                                                                                                                                                                                                                                                                                                                                                                                                                                                                                                                                                                                                                      |
| <b>Search Filters:</b>      | <p>In development of the search strategies the following search filters were used and partly modified:</p> <p>Systematic Reviews</p> <ul style="list-style-type: none"><li>- SIGN Search Strategy Systematic Reviews, OVID format. Scottish Intermediate Guidelines Network (SIGN), Filter Systematic Reviews. Available from: <a href="http://sign.ac.uk/search-filters.html">http://sign.ac.uk/search-filters.html</a> (Word document last modified April 25, 2017; cited May 13, 2020) [supplemented by additional search terms]</li></ul> <p>Country restrictions:</p> <ul style="list-style-type: none"><li>- Campbell, Sandy. Filter to Retrieve Studies Related to Canada, Canadian Provinces, and the One Hundred Largest Canadian Centres from the OVID MEDLINE Database. John W. Scott Health Sciences Library, University of Alberta. Rev. March 06, 2020. Available from: <a href="http://guides.library.ualberta.ca/health-sciences-search-filters/geographic-filters">http://guides.library.ualberta.ca/health-sciences-search-filters/geographic-filters</a> [used, partly modified]</li></ul> |

- UAB Libraries. PubMed via LHL: Hedges: Search filter United States (work in progress!) [Internet], Cited: October 19, 2020. Available from: <https://guides.library.uab.edu/pubmed/hedges> [used, partly modified]
- Ayiku L, Levay P, Hudson T, Craven J, Barrett E, Finnegan A and Adams R. The MEDLINE UK filter: development and validation of a geographic search filter to retrieve research about the UK from OVID MEDLINE. Health Information and Libraries Journal, 2017 34 (3): 200-216. [consulted, partly used /adapted]

| # | Search Terms                                                                                                                                                                                                                                                                                              | Hits  |
|---|-----------------------------------------------------------------------------------------------------------------------------------------------------------------------------------------------------------------------------------------------------------------------------------------------------------|-------|
| 1 | *Cytomegalovirus/                                                                                                                                                                                                                                                                                         | 12937 |
| 2 | exp *Cytomegalovirus Infections/                                                                                                                                                                                                                                                                          | 19871 |
| 3 | Cytomegalovir\$.kf.                                                                                                                                                                                                                                                                                       | 3627  |
| 4 | Cytomegalovirus/ and (Cytomegalovir\$ or cmv or hcmv or ccmv or human herpesvirus 5 or human herpes virus 5 or human herpesvirus type 5 or human herpes virus type 5 or human betaherpesvirus 5 or human beta-herpesvirus 5 or HHV 5 or HHV5 or salivary gland virus\$ or cytomegalic).ab.                | 16581 |
| 5 | exp Cytomegalovirus Infections/ and (Cytomegalovir\$ or cmv or hcmv or ccmv or human herpesvirus 5 or human herpes virus 5 or human herpesvirus type 5 or human herpes virus type 5 or human betaherpesvirus 5 or human beta-herpesvirus 5 or HHV 5 or HHV5 or salivary gland virus\$ or cytomegalic).ab. | 17633 |
| 6 | (Cytomegalovir\$ or cmv or hcmv or ccmv or human herpesvirus 5 or human herpes virus 5 or human herpesvirus type 5 or human herpes virus type 5 or human betaherpesvirus 5 or human beta-herpesvirus 5 or HHV 5 or HHV5 or salivary gland virus\$).ti,kf.                                                 | 27806 |
| 7 | Cytomegalovir\$.ab. /freq=2                                                                                                                                                                                                                                                                               | 4967  |
| 8 | Cytomegalovir\$.af. and (cmv or hcmv or ccmv or hhv 5 or hhv5).ab. /freq=2                                                                                                                                                                                                                                | 20759 |

|    |                                                                                                                                                                                                                                                                                                                                                                                                                    |        |
|----|--------------------------------------------------------------------------------------------------------------------------------------------------------------------------------------------------------------------------------------------------------------------------------------------------------------------------------------------------------------------------------------------------------------------|--------|
| 9  | (Cytomegalovirus or cmv or hcmv or ccmv or human herpesvirus 5 or human herpes virus 5 or human herpesvirus type 5 or human herpes virus type 5 or human betaherpesvirus 5 or human beta-herpesvirus 5 or HHV 5 or HHV5 or salivary gland virus).ab. and ("in data review" or in process or publisher or "pubmed not medline").st.                                                                                 | 3802   |
| 10 | or/1-9                                                                                                                                                                                                                                                                                                                                                                                                             | 39613  |
| 11 | exp Cytomegalovirus Infections/ep, mo                                                                                                                                                                                                                                                                                                                                                                              | 3363   |
| 12 | Virus Diseases/ep, mo                                                                                                                                                                                                                                                                                                                                                                                              | 4520   |
| 13 | Infant, Newborn, Diseases/ep, mo                                                                                                                                                                                                                                                                                                                                                                                   | 4524   |
| 14 | Infant, Premature, Diseases/ep, mo                                                                                                                                                                                                                                                                                                                                                                                 | 3652   |
| 15 | Pregnancy Complications, Infectious/ep, mo, sn                                                                                                                                                                                                                                                                                                                                                                     | 7879   |
| 16 | Infectious Disease Transmission, Vertical/sn                                                                                                                                                                                                                                                                                                                                                                       | 1145   |
| 17 | Disease Transmission, Infectious/sn                                                                                                                                                                                                                                                                                                                                                                                | 753    |
| 18 | exp prenatal diagnosis/sn                                                                                                                                                                                                                                                                                                                                                                                          | 2026   |
| 19 | Prevalence/                                                                                                                                                                                                                                                                                                                                                                                                        | 296299 |
| 20 | Incidence/                                                                                                                                                                                                                                                                                                                                                                                                         | 266173 |
| 21 | Mortality/ or Child Mortality/ or Fetal Mortality/ or Hospital Mortality.mp. or exp Infant Mortality/ or mortality, premature/ [mp=title, abstract, original title, name of substance word, subject heading word, floating sub-heading word, keyword heading word, organism supplementary concept word, protocol supplementary concept word, rare disease supplementary concept word, unique identifier, synonyms] | 133712 |
| 22 | Seroepidemiologic Studies/                                                                                                                                                                                                                                                                                                                                                                                         | 20786  |
| 23 | Neonatal Screening/                                                                                                                                                                                                                                                                                                                                                                                                | 10284  |
| 24 | dried blood spot testing/                                                                                                                                                                                                                                                                                                                                                                                          | 1516   |
| 25 | Virus shedding/                                                                                                                                                                                                                                                                                                                                                                                                    | 3452   |

|    |                                                                                                                                                                                                                                                                 |         |
|----|-----------------------------------------------------------------------------------------------------------------------------------------------------------------------------------------------------------------------------------------------------------------|---------|
| 26 | (prevalence\$ or prevalent or incidence\$ or incident or mortalit\$ or epidemiolog\$ or seroepidemiolog\$ or seroprevalen\$ or seroinciden\$ or serosurvey\$ or sero-survey\$ or serosurveillance or sero surveillance or morbidity or seropositiv\$).ti,ab,kf. | 2581314 |
| 27 | (cases adj4 (birth\$ or year\$ or positive or symptomatic or asymptomatic)).ti,ab.                                                                                                                                                                              | 93518   |
| 28 | (CMV cases or HCMV cases or CCMV cases).ti,ab.                                                                                                                                                                                                                  | 50      |
| 29 | ((transmission or diagnosis) adj4 rate\$).ti,ab.                                                                                                                                                                                                                | 17115   |
| 30 | (transmission adj3 risk).mp.                                                                                                                                                                                                                                    | 12947   |
| 31 | (infection rate\$ or disease rate\$).ti,ab,kf.                                                                                                                                                                                                                  | 26954   |
| 32 | Frequency.ti,ab.                                                                                                                                                                                                                                                | 836562  |
| 33 | ((neonat\$ or newborn\$ or prenatal or maternal) adj2 screening).ti,ab.                                                                                                                                                                                         | 15905   |
| 34 | Shedding.ti,ab,kf.                                                                                                                                                                                                                                              | 26093   |
| 35 | or/11-34                                                                                                                                                                                                                                                        | 3550877 |
| 36 | Epidemiologic studies/                                                                                                                                                                                                                                          | 8440    |
| 37 | exp case control studies/                                                                                                                                                                                                                                       | 1113112 |
| 38 | exp cohort studies/                                                                                                                                                                                                                                             | 2046004 |
| 39 | Retrospective Studies/                                                                                                                                                                                                                                          | 846708  |
| 40 | Cross-sectional studies/                                                                                                                                                                                                                                        | 341206  |
| 41 | observational studies as topic/ or observational study/                                                                                                                                                                                                         | 92324   |
| 42 | evaluation studies/                                                                                                                                                                                                                                             | 254447  |
| 43 | Databases, Factual/ or Data Collection/                                                                                                                                                                                                                         | 171169  |
| 44 | (Long-term or observational or cohort? or longitudinal or prospective or retrospective or comparative or case-control or cross-sectional or survey\$).ti.                                                                                                       | 935483  |
| 45 | (real-world or real life).ti.                                                                                                                                                                                                                                   | 14230   |

|    |                                                                                                                                                                                                                                                                                                                                                                                                                                                                                                                |         |
|----|----------------------------------------------------------------------------------------------------------------------------------------------------------------------------------------------------------------------------------------------------------------------------------------------------------------------------------------------------------------------------------------------------------------------------------------------------------------------------------------------------------------|---------|
| 46 | (cohort analys\$ or cohort stud\$ or longitudinal stud\$ or chart review\$ or medical record review\$ or observational stud\$ or retrospective analys\$ or retrospective chart review? or retrospective clinical stud\$ or retrospective cohort\$ or retrospective stud\$ or retrospective database\$ or retrospective observational\$ or cross-sectional stud\$ or cross-sectional setting\$ or case control stud\$ or case control setting or nested case control stud\$ or matched case-control stud\$).kf. | 24977   |
| 47 | (cohort adj (study or studies or analy\$)).ti,ab.                                                                                                                                                                                                                                                                                                                                                                                                                                                              | 222847  |
| 48 | (cohort\$ adj2 (birth\$ or newborn\$)).ti,ab,kw.                                                                                                                                                                                                                                                                                                                                                                                                                                                               | 18603   |
| 49 | ((longitudinal or cross sectional or case-control or pragmatic or large scale) adj (study or studies)).ti,ab.                                                                                                                                                                                                                                                                                                                                                                                                  | 356940  |
| 50 | ((observational or retrospective or prospective) adj3 (study or studies or cohort\$1 or data\$ or analys#s)).ti,ab.                                                                                                                                                                                                                                                                                                                                                                                            | 870211  |
| 51 | ((real world or real life) adj3 (data\$ or setting or cohort\$ or stud\$ or experience\$ or result\$)).ti,ab.                                                                                                                                                                                                                                                                                                                                                                                                  | 21155   |
| 52 | (data adj (report\$ or data system\$1)).ti,ab.                                                                                                                                                                                                                                                                                                                                                                                                                                                                 | 11511   |
| 53 | Electronic health records/                                                                                                                                                                                                                                                                                                                                                                                                                                                                                     | 20420   |
| 54 | (chart review or medical record review or (review adj5 patient records) or case series or consecutive patients or nonconsecutive patients).ti,ab.                                                                                                                                                                                                                                                                                                                                                              | 274141  |
| 55 | ((Population-based or nationwide or community based or national or hospital based) adj3 (stud\$3 or cohort\$ or data or register\$ or database\$ or sample\$)).ti,ab.                                                                                                                                                                                                                                                                                                                                          | 226296  |
| 56 | (Database analys#s or database stud\$ or claims data\$).ti,ab.                                                                                                                                                                                                                                                                                                                                                                                                                                                 | 18874   |
| 57 | (single center or single centre or single institution or hospital\$).ti.                                                                                                                                                                                                                                                                                                                                                                                                                                       | 352399  |
| 58 | or/36-57                                                                                                                                                                                                                                                                                                                                                                                                                                                                                                       | 4157977 |
| 59 | exp registries/                                                                                                                                                                                                                                                                                                                                                                                                                                                                                                | 98348   |
| 60 | (registries or registry or disease registr\$3 or register\$1).ti,ab,kf.                                                                                                                                                                                                                                                                                                                                                                                                                                        | 201122  |

|    |                                                                                                                                                                                                                                                                                                                                                                                                    |         |
|----|----------------------------------------------------------------------------------------------------------------------------------------------------------------------------------------------------------------------------------------------------------------------------------------------------------------------------------------------------------------------------------------------------|---------|
| 61 | or/59-60                                                                                                                                                                                                                                                                                                                                                                                           | 237017  |
| 62 | Health Surveys/                                                                                                                                                                                                                                                                                                                                                                                    | 63083   |
| 63 | exp population surveillance/                                                                                                                                                                                                                                                                                                                                                                       | 69979   |
| 64 | exp "Surveys and Questionnaires"/                                                                                                                                                                                                                                                                                                                                                                  | 1050333 |
| 65 | (health survey\$1 or survey\$1 or surveillance).ti,ab,kf.                                                                                                                                                                                                                                                                                                                                          | 787968  |
| 66 | exp Seroepidemiologic Studies/                                                                                                                                                                                                                                                                                                                                                                     | 23739   |
| 67 | Neonatal Screening/                                                                                                                                                                                                                                                                                                                                                                                | 10284   |
| 68 | Mass screening/                                                                                                                                                                                                                                                                                                                                                                                    | 104563  |
| 69 | dried blood spot testing/                                                                                                                                                                                                                                                                                                                                                                          | 1516    |
| 70 | ((neonat\$ or newborn\$ or prenatal or maternal) adj3 screen\$).ti,ab.                                                                                                                                                                                                                                                                                                                             | 18222   |
| 71 | ((CMV or HCMV or CCMV or cytomegalovirus) adj3 screen\$).ti,ab.                                                                                                                                                                                                                                                                                                                                    | 612     |
| 72 | or/62-71                                                                                                                                                                                                                                                                                                                                                                                           | 1611508 |
| 73 | 58 or 61 or 72                                                                                                                                                                                                                                                                                                                                                                                     | 5116765 |
| 74 | 73 not (exp animals/ not humans/)                                                                                                                                                                                                                                                                                                                                                                  | 4926055 |
| 75 | Mathematical Concepts/                                                                                                                                                                                                                                                                                                                                                                             | 4082    |
| 76 | Models, Theoretical/                                                                                                                                                                                                                                                                                                                                                                               | 152296  |
| 77 | exp Models, Statistical/                                                                                                                                                                                                                                                                                                                                                                           | 413503  |
| 78 | Computer Simulation/                                                                                                                                                                                                                                                                                                                                                                               | 189775  |
| 79 | model\$.kw.                                                                                                                                                                                                                                                                                                                                                                                        | 18917   |
| 80 | (model or models or modelling or modeling).ti. not (((mouse or mice or murine or rat or rats or rabbit or rabbits or cat or cats or dog or dogs or swine or porcine or pig or pigs or piglet or piglets or lamb or lambs or cattle or bovine or monkey or monkeys or rhesus or macaque\$ or nonhuman or "in vitro" or animal\$ or organism\$) adj3 model\$).ti,kf. or exp Disease Models, Animal/) | 419582  |

|    |                                                                                                                                                                                                                                                                                                                                                      |         |
|----|------------------------------------------------------------------------------------------------------------------------------------------------------------------------------------------------------------------------------------------------------------------------------------------------------------------------------------------------------|---------|
| 81 | ((mathematic\$ or statistic\$ or transmission\$ or epidemiolog\$ or epidemic\$ or vaccination\$ or immuni\$ or theoretical\$) adj3 model\$).ti,ab,kf.                                                                                                                                                                                                | 129315  |
| 82 | ((linear or nonlinear or static\$ or dynamic\$ or explicit or implicit or discrete\$ or continuous\$ or deterministic\$ or probabilistic\$ or stochastic\$ or deductive or inductive or floating or strateg\$ or nonstrateg\$ or conceptual\$ or quantitative\$ or qualitative\$ or individual\$ or structured or catalytic) adj3 model\$).ti,ab,kf. | 205030  |
| 83 | or/75-82                                                                                                                                                                                                                                                                                                                                             | 1213189 |
| 84 | 83 not (exp animals/ not humans/)                                                                                                                                                                                                                                                                                                                    | 1087710 |
| 85 | 84 not (animals/ and (mouse or mice or murine or rat or rats or rabbit or rabbits or cat or cats or dog or dogs or swine or porcine or pig or pigs or piglet or piglets or lamb or lambs or cattle or bovine or monkey or monkeys or rhesus or macaque\$ or nonhuman or "in vitro" or animal\$ or organism\$ or "in vivo").ti.)                      | 1080980 |
| 86 | Meta-Analysis as Topic/                                                                                                                                                                                                                                                                                                                              | 18508   |
| 87 | Systematic Review/                                                                                                                                                                                                                                                                                                                                   | 137586  |
| 88 | Meta-Analysis/                                                                                                                                                                                                                                                                                                                                       | 121385  |
| 89 | exp Technology Assessment, Biomedical/                                                                                                                                                                                                                                                                                                               | 11214   |
| 90 | (meta analy\$ or metaanaly\$).tw.                                                                                                                                                                                                                                                                                                                    | 184057  |
| 91 | (systematic adj2 (review\$1 or overview\$1)).tw.                                                                                                                                                                                                                                                                                                     | 191540  |
| 92 | exp Review Literature as Topic/                                                                                                                                                                                                                                                                                                                      | 14690   |
| 93 | (cochrane or embase or psychlit or psyclit or psychinfo or psycinfo or cinahl or cinhal or science citation index or bids or cancerlit or biosis or lilacs or web of science or scopus).ab.                                                                                                                                                          | 176872  |
| 94 | (reference list\$ or bibliograph\$ or hand-search\$ or relevant journals or manual search\$).ab.                                                                                                                                                                                                                                                     | 44761   |
| 95 | (selection criteria or eligibility criteria or data extraction).ab. and review/                                                                                                                                                                                                                                                                      | 33516   |

|     |                                                                                                                                                                                                                                                                                                                                                                                                                                                                                        |        |
|-----|----------------------------------------------------------------------------------------------------------------------------------------------------------------------------------------------------------------------------------------------------------------------------------------------------------------------------------------------------------------------------------------------------------------------------------------------------------------------------------------|--------|
| 96  | ((systematic\$ or methodologic or quantitative or integrative or collaborative) adj5 (review or overview)) or technology assessment or bibliographic study).ti.                                                                                                                                                                                                                                                                                                                        | 143743 |
| 97  | or/86-96                                                                                                                                                                                                                                                                                                                                                                                                                                                                               | 409520 |
| 98  | 97 not (comment/ or letter/ or editorial/)                                                                                                                                                                                                                                                                                                                                                                                                                                             | 393331 |
| 99  | 98 not (exp animals/ not humans.sh.)                                                                                                                                                                                                                                                                                                                                                                                                                                                   | 388736 |
| 100 | exp Australia/                                                                                                                                                                                                                                                                                                                                                                                                                                                                         | 146136 |
| 101 | Australia\$.ti,bt,ab,kw,jw.                                                                                                                                                                                                                                                                                                                                                                                                                                                            | 244745 |
| 102 | exp Japan/                                                                                                                                                                                                                                                                                                                                                                                                                                                                             | 136254 |
| 103 | Japan\$.ti,bt,ab,kw,jw.                                                                                                                                                                                                                                                                                                                                                                                                                                                                | 515422 |
| 104 | Israel/                                                                                                                                                                                                                                                                                                                                                                                                                                                                                | 29458  |
| 105 | Israel\$.ti,bt,ab,kw,jw.                                                                                                                                                                                                                                                                                                                                                                                                                                                               | 43936  |
| 106 | or/100-105                                                                                                                                                                                                                                                                                                                                                                                                                                                                             | 877504 |
| 107 | exp Canada/                                                                                                                                                                                                                                                                                                                                                                                                                                                                            | 160249 |
| 108 | Canada.ti,bt,ab,kw.                                                                                                                                                                                                                                                                                                                                                                                                                                                                    | 87879  |
| 109 | Canadian\$.ti,bt,ab,jw,kf.                                                                                                                                                                                                                                                                                                                                                                                                                                                             | 260409 |
| 110 | (british columbia or alberta\$ or saskatchewan or manitoba\$ or ontario or quebec or new brunswick or nouveau brunswick or nova scotia or nouvelle ecosse or prince edward island or newfoundland or labrador or nunavut or nwt or northwest territories or yukon or nunavik or inuvialuit).ti,ab,kw,jw.                                                                                                                                                                               | 78728  |
| 111 | (Abbotsford or Airdrie or Ajax or Aurora or Barrie or Belleville or Blainville or Brampton or Brantford or Brossard or Burlington or Burnaby or Caledon or Calgary or Cape Breton or Chatham Kent or Chilliwack or Clarington or Coquitlam or Drummondville or Edmonton or Fredericton or Fort McMurray or Gatineau or Granby or Grande Prairie or Sudbury or Guelph or Halton Hills or Iqaluit or Inuvik or Kamloops or Kawartha Lakes or Kelowna or Kingston or Kitchener or Langley | 113930 |



|     |                                                                                                                                                                                                                                                                                                                                                                                                                                                                                                                                                                                                                                                                                                                                                                                                                                                                                                                                                                                                                                                                                                                                                                                                                                                                                                                                                                                                                                                                                                                                        |         |
|-----|----------------------------------------------------------------------------------------------------------------------------------------------------------------------------------------------------------------------------------------------------------------------------------------------------------------------------------------------------------------------------------------------------------------------------------------------------------------------------------------------------------------------------------------------------------------------------------------------------------------------------------------------------------------------------------------------------------------------------------------------------------------------------------------------------------------------------------------------------------------------------------------------------------------------------------------------------------------------------------------------------------------------------------------------------------------------------------------------------------------------------------------------------------------------------------------------------------------------------------------------------------------------------------------------------------------------------------------------------------------------------------------------------------------------------------------------------------------------------------------------------------------------------------------|---------|
|     | <p>or Laval or Lethbridge or Levis or Longueuil or Maple Ridge or Markham or Medicine Hat or Milton or Mirabel or Mississauga or Moncton or Montreal or Nanaimo or New Westminster or Newmarket or Niagara Falls or Norfolk County or North Bay or North Vancouver or North Vancouver or Oakville or Oshawa or Ottawa or Peterborough or Pickering or Port Coquitlam or Prince George or Quebec City or Red Deer or Regina or Repentigny or Richmond or Richmond Hill or Saanich or Saguenay or Saint John or Saint-Hyacinthe or Saint-Jean-sur-Richelieu or Saint-Jerome or Sarnia or Saskatoon or Sault Ste Marie or Sherbrooke or St Albert or St Catharines or St John's or Strathcona County or Surrey or Terrebonne or Thunder Bay or Toronto or Trois-Rivieres or Vancouver or Vaughan or ((Cambridge or (Halifax or Hamilton or London or Victoria or Waterloo or Welland or Whitby or Windsor)) not (UK or Britain or United Kingdom or England or Australia)) or Whitehorse or Winnipeg or Wood Buffalo or Yellowknife).ti,ab,kw.</p>                                                                                                                                                                                                                                                                                                                                                                                                                                                                                        |         |
| 112 | <p>(Abbotsford or Airdrie or Ajax or Aurora or Barrie or Belleville or Blainville or Brampton or Brantford or Brossard or Burlington or Burnaby or Caledon or Calgary or Cape Breton or Chatham Kent or Chilliwack or Clarington or Coquitlam or Drummondville or Edmonton or Fredericton or Fort McMurray or Gatineau or Granby or Grande Prairie or Sudbury or Guelph or Halton Hills or Iqaluit or Inuvik or Kamloops or Kawartha Lakes or Kelowna or Kingston or Kitchener or Langley or Laval or Lethbridge or Levis or Longueuil or Maple Ridge or Markham or Medicine Hat or Milton or Mirabel or Mississauga or Moncton or Montreal or Nanaimo or New Westminster or Newmarket or Niagara Falls or Norfolk County or North Bay or North Vancouver or North Vancouver or Oakville or Oshawa or Ottawa or Peterborough or Pickering or Port Coquitlam or Prince George or Quebec City or Red Deer or Regina or Repentigny or Richmond or Richmond Hill or Saanich or Saguenay or Saint John or Saint-Hyacinthe or Saint-Jean-sur-Richelieu or Saint-Jerome or Sarnia or Saskatoon or Sault Ste Marie or Sherbrooke or St Albert or St Catharines or St John's or Strathcona County or Surrey or Terrebonne or Thunder Bay or Toronto or Trois-Rivieres or Vancouver or Vaughan or ((Cambridge or (Halifax or Hamilton or London or Victoria or Waterloo or Welland or Whitby or Windsor)) not (UK or Britain or United Kingdom or England or Australia)) or Whitehorse or Winnipeg or Wood Buffalo or Yellowknife).ti,ab,kw.</p> | 113930  |
| 113 | exp United States/                                                                                                                                                                                                                                                                                                                                                                                                                                                                                                                                                                                                                                                                                                                                                                                                                                                                                                                                                                                                                                                                                                                                                                                                                                                                                                                                                                                                                                                                                                                     | 1358558 |

|     |                                                                                                                                                                                                                                                                                                                                                                                                                                                                                                                                                                                                                                                                                                                                                                                                                                                                                                                                                                                                                                                                                                                                                                                                                                                                                                                                                              |        |
|-----|--------------------------------------------------------------------------------------------------------------------------------------------------------------------------------------------------------------------------------------------------------------------------------------------------------------------------------------------------------------------------------------------------------------------------------------------------------------------------------------------------------------------------------------------------------------------------------------------------------------------------------------------------------------------------------------------------------------------------------------------------------------------------------------------------------------------------------------------------------------------------------------------------------------------------------------------------------------------------------------------------------------------------------------------------------------------------------------------------------------------------------------------------------------------------------------------------------------------------------------------------------------------------------------------------------------------------------------------------------------|--------|
| 114 | (united states or usa or us national or us census or us state\$ or US cohort\$ or US population or US adult\$ or US children).ti,ab,kw.                                                                                                                                                                                                                                                                                                                                                                                                                                                                                                                                                                                                                                                                                                                                                                                                                                                                                                                                                                                                                                                                                                                                                                                                                      | 381782 |
| 115 | (US or (U adj S)).ti.                                                                                                                                                                                                                                                                                                                                                                                                                                                                                                                                                                                                                                                                                                                                                                                                                                                                                                                                                                                                                                                                                                                                                                                                                                                                                                                                        | 68472  |
| 116 | (America\$ not (Central America\$ or South America\$ or Latin America\$)).ti.                                                                                                                                                                                                                                                                                                                                                                                                                                                                                                                                                                                                                                                                                                                                                                                                                                                                                                                                                                                                                                                                                                                                                                                                                                                                                | 109659 |
| 117 | ((midatlantic or mid-atlantic or middle-atlantic or Midwest\$3 or northeast\$3 or northwest\$3 or southeast\$3 or southern or southwest\$3) adj (state\$1 or region\$ or us or usa)).ti,ab,kw.                                                                                                                                                                                                                                                                                                                                                                                                                                                                                                                                                                                                                                                                                                                                                                                                                                                                                                                                                                                                                                                                                                                                                               | 15854  |
| 118 | (Appalachia\$ or great lakes or great plains or heartland or new England or pacific northwest or deep south or black belt or rust belt or district of Columbia or Washington DC or Alabama or Alaska or Arizona or Arkansas or little rock or California or san Francisco or San Diego or Los Angeles or Colorado or Connecticut or Florida or Hawaii or Honolulu or Idaho or Gainesville or Jacksonville or Tampa or Tallahassee or Georgia or Atlanta or Illinois or Chicago or Indiana or Indianapolis or West Lafayette or iowa or Kansas or Wichita or Kentucky or Louisiana or new Orleans or baton rouge or Shreveport or Maine or Orono or Johns Hopkins or Massachusetts or Boston or Harvard or Michigan or Detroit or Ann Arbor or East Lansing or Minnesota or Minneapolis or Rochester or Montana or Mississippi or Missouri or Missoula or Nebraska or Nevada or Las Vegas or New Hampshire or New Jersey or New Mexico or New York or North Carolina or North Dakota or Ohio or Cincinnati or Oklahoma or Oregon or Illinois or Chicago or Maryland or Pennsylvania or Philadelphia or South Carolina or South Dakota or Tennessee or Nashville or Memphis or Texas or Houston or Utah or Vermont or Virginia or Rhode Island or Washington or Seattle or West Virginia or Wisconsin or Wyoming or Delaware or Mayo Clinic or AHRQ).ti,ab,kw. | 508651 |
| 119 | ((Birmingham or Montgomery) adj al) or Huntsville or anchorage or fairbanks or Phoenix or Tuscon or Flagstaff or Berkeley or Stanford or Vail or Denver or Farmington or New Haven or Hartford or Wilmington or Newark or Miami or ((Athens or Augusta) adj ga) or Boise or Urbana or Evanston or Lexington or Louisville or Bardstown or (Scarborough adj me) or Bethesda or Baltimore or Rockville or (Worcester adj ma) or Burlington or St Paul or Saint Paul or (Jackson adj                                                                                                                                                                                                                                                                                                                                                                                                                                                                                                                                                                                                                                                                                                                                                                                                                                                                            | 91648  |

|     |                                                                                                                                                                                                                                                          |         |
|-----|----------------------------------------------------------------------------------------------------------------------------------------------------------------------------------------------------------------------------------------------------------|---------|
|     | ms) or (Columbia adj mo) or Bozeman or Omaha or Lincoln or Columbus or Cleveland or Portland or Hershey or providence or Richmond or Washington).ti,ab,kw.                                                                                               |         |
| 120 | Dollar\$.ti,ab.                                                                                                                                                                                                                                          | 20319   |
| 121 | (medicare or medicaid).ti,ab.                                                                                                                                                                                                                            | 60588   |
| 122 | North America/                                                                                                                                                                                                                                           | 20434   |
| 123 | or/107-122                                                                                                                                                                                                                                               | 2381156 |
| 124 | exp Europe/                                                                                                                                                                                                                                              | 1428598 |
| 125 | European Union/                                                                                                                                                                                                                                          | 16303   |
| 126 | (Europe\$3 or EU5).ti,ab,bt,kf,jw.                                                                                                                                                                                                                       | 850807  |
| 127 | exp France/                                                                                                                                                                                                                                              | 101521  |
| 128 | (France or french).ti,bt,ab,kw,jw.                                                                                                                                                                                                                       | 141553  |
| 129 | exp Germany/                                                                                                                                                                                                                                             | 119708  |
| 130 | German\$1.ti,bt,ab,kf,jw.                                                                                                                                                                                                                                | 142372  |
| 131 | exp Italy/                                                                                                                                                                                                                                               | 97093   |
| 132 | (Italy or Italian\$).ti,bt,ab,kf,jw.                                                                                                                                                                                                                     | 182122  |
| 133 | exp Spain/                                                                                                                                                                                                                                               | 77699   |
| 134 | (Spain or Spanish or Spaniards).ti,bt,ab,kw,jw.                                                                                                                                                                                                          | 107844  |
| 135 | exp United Kingdom/                                                                                                                                                                                                                                      | 367536  |
| 136 | (UK or U K).ti.                                                                                                                                                                                                                                          | 30380   |
| 137 | (Britain\$ or (British\$ not "British Columbia") or United Kingdom\$ or (England\$ not "New England") or Northern Ireland\$ or Northern Irish\$ or Scotland\$ or Scottish\$ or ((Wales or "South Wales") not "New South Wales") or Welsh\$).ti,ab,kw,jw. | 681750  |
| 138 | (English adj3 (Society or Association or patients)).ti,ab.                                                                                                                                                                                               | 2507    |

|     |                                                                                                                                                                                                                                                                                                                                                                                                                                                                                                                                                                                                                                                                                                                                                                      |         |
|-----|----------------------------------------------------------------------------------------------------------------------------------------------------------------------------------------------------------------------------------------------------------------------------------------------------------------------------------------------------------------------------------------------------------------------------------------------------------------------------------------------------------------------------------------------------------------------------------------------------------------------------------------------------------------------------------------------------------------------------------------------------------------------|---------|
| 139 | (English adj (population or hospital\$1 or citizen\$)).ti,ab.                                                                                                                                                                                                                                                                                                                                                                                                                                                                                                                                                                                                                                                                                                        | 700     |
| 140 | "National Institute for Health and Care Excellence".ti,ab.                                                                                                                                                                                                                                                                                                                                                                                                                                                                                                                                                                                                                                                                                                           | 1956    |
| 141 | (National Health Service\$ or nhs\$).ti,ab.                                                                                                                                                                                                                                                                                                                                                                                                                                                                                                                                                                                                                                                                                                                          | 43472   |
| 142 | ((Albania\$ or Andorra\$ or Armenia\$ or Austria\$ or Azerbaijan\$ or Belarus\$ or Belgium or Belgian\$ or Bosnia\$ and Herzegovin\$) or Bulgaria\$ or Croatia\$ or Cyprus or Cyprian\$ or Czechia\$ or Denmark or Danish or Estonia\$ or Finland or Finnish or Georgia\$ or Greece or Greek\$ or Hungary or Hungarian\$ or Iceland\$ or Ireland or Irish or Kosovo\$ or Latvia\$ or Liechtenstein or Lithuania\$ or Luxembourg\$ or Malta or Moldova\$ or Monaco or Montenegro or Netherlands or Dutch\$ or North Macedonia\$ or Norway or Norwegian\$ or Poland or Polish or Portugal or Portuguese or Romania\$ or San Marino or Serbia\$ or Slovakia\$ or Slovenia\$ or Sweden or Swedish or Switzerland or Swiss or Turkey or Turkish or Ukrain\$).ti,ab,kf,jw. | 627187  |
| 143 | (euro or euros or EUR).ti,ab.                                                                                                                                                                                                                                                                                                                                                                                                                                                                                                                                                                                                                                                                                                                                        | 18001   |
| 144 | or/124-143                                                                                                                                                                                                                                                                                                                                                                                                                                                                                                                                                                                                                                                                                                                                                           | 3274631 |
| 145 | exp South America/                                                                                                                                                                                                                                                                                                                                                                                                                                                                                                                                                                                                                                                                                                                                                   | 164209  |
| 146 | exp Central America/                                                                                                                                                                                                                                                                                                                                                                                                                                                                                                                                                                                                                                                                                                                                                 | 15845   |
| 147 | Caribbean Region/ or West Indies/ or Dominican Republic/                                                                                                                                                                                                                                                                                                                                                                                                                                                                                                                                                                                                                                                                                                             | 5086    |
| 148 | Latin America/                                                                                                                                                                                                                                                                                                                                                                                                                                                                                                                                                                                                                                                                                                                                                       | 11260   |
| 149 | (Latin? America\$ or Latinoamerica\$ or South America\$ or Central America\$ or Caribbean\$).ti,bt,ab,kw,jw.                                                                                                                                                                                                                                                                                                                                                                                                                                                                                                                                                                                                                                                         | 75679   |
| 150 | (Argentina or Argentinian\$ or Bolivia\$ or Brazil\$ or Brasil\$ or Chile or Chilean\$ or Colombia\$ or Ecuador or Ecuadorian\$ or Paraguay\$ or Peru or Peruvian\$ or Uruguay\$ or Venezuela\$ or Costa Rica\$ or El Salvador or Salvadorian\$ or Guatemala\$ or Guatemaltec\$ or Honduras\$ or Mexico or Mexican\$ or Nicaragua\$ or Panama\$ or Dominican Republic or Dominican\$).ti,bt,ab,kw,jw.                                                                                                                                                                                                                                                                                                                                                                | 405238  |

|     |                                                                                                                                                                                                                                               |         |
|-----|-----------------------------------------------------------------------------------------------------------------------------------------------------------------------------------------------------------------------------------------------|---------|
| 151 | (Buenos Aires or La Paz or Sucre or Rio de Janeiro or Sao Paulo or Santiago or Valparaiso or Concepcion or Bogota or Quito or Asuncion or Lima or Montevideo or Caracas or San Salvador or Tegucigalpa or Managua or Santo Domingo).ti,bt,ab. | 38093   |
| 152 | or/145-151                                                                                                                                                                                                                                    | 499746  |
| 153 | (Global\$2 or worldwide or world wide).ti,ab,bt,kf.                                                                                                                                                                                           | 643122  |
| 154 | International.ti,bt.                                                                                                                                                                                                                          | 74849   |
| 155 | or/153-154                                                                                                                                                                                                                                    | 711714  |
| 156 | 106 or 123 or 144 or 152 or 155                                                                                                                                                                                                               | 7131150 |
| 157 | 74 or 85                                                                                                                                                                                                                                      | 5641997 |
| 158 | 156 and 157                                                                                                                                                                                                                                   | 2153283 |
| 159 | 99 or 158                                                                                                                                                                                                                                     | 2488216 |
| 160 | 10 and 35                                                                                                                                                                                                                                     | 12232   |
| 161 | 159 and 160                                                                                                                                                                                                                                   | 1956    |
| 162 | limit 161 to yr="2000 -Current"                                                                                                                                                                                                               | 1537    |
| 163 | limit 162 to English language                                                                                                                                                                                                                 | 1445    |

5 **Supplemental Table 2. Initial search strategy for Embase**

|                             |                                                                                                     |
|-----------------------------|-----------------------------------------------------------------------------------------------------|
|                             | Embase                                                                                              |
| <b>Search Platform:</b>     | Ovid                                                                                                |
| <b>Date of Search:</b>      | October 27, 2020<br><br>[Last Database Update: October 26, 2020]                                    |
| <b>Date Range Searched:</b> | 1974 to current, restricted to 2000 to current                                                      |
| <b>Search Filters:</b>      | In development of the search strategies the following search filters were used and partly modified: |

|  |                                                                                                                                                                                                                                                                                                                                                                                                                                                                                                                                                                                                                                                                                                                                                                                                                                                                                                                                                                                                                                                                                                                                                                                                                                                                                                                                                                                                                                                                                                                                                                                                                                                              |
|--|--------------------------------------------------------------------------------------------------------------------------------------------------------------------------------------------------------------------------------------------------------------------------------------------------------------------------------------------------------------------------------------------------------------------------------------------------------------------------------------------------------------------------------------------------------------------------------------------------------------------------------------------------------------------------------------------------------------------------------------------------------------------------------------------------------------------------------------------------------------------------------------------------------------------------------------------------------------------------------------------------------------------------------------------------------------------------------------------------------------------------------------------------------------------------------------------------------------------------------------------------------------------------------------------------------------------------------------------------------------------------------------------------------------------------------------------------------------------------------------------------------------------------------------------------------------------------------------------------------------------------------------------------------------|
|  | <p>Systematic Reviews</p> <ul style="list-style-type: none"> <li>- SIGN Search Strategy Systematic Reviews, OVID format. Scottish Intermediate Guidelines Network (SIGN), Filter Systematic Reviews, Available from: <a href="http://sign.ac.uk/search-filters.html">http://sign.ac.uk/search-filters.html</a> (Word document last modified April 25, 2017; cited May 13, 2020) [slightly modified, supplemented with additional search terms]</li> </ul> <p>Country restrictions:</p> <ul style="list-style-type: none"> <li>- Campbell, Sandy. Filter to Retrieve Studies Related to Canada, Canadian Provinces, and the One Hundred Largest Canadian Centres from the OVID MEDLINE Database. John W. Scott Health Sciences Library, University of Alberta. Rev. March 06, 2020. Available from: <a href="http://guides.library.ualberta.ca/health-sciences-search-filters/geographic-filters">http://guides.library.ualberta.ca/health-sciences-search-filters/geographic-filters</a> [used, partly modified/adapted]</li> <li>- UAB Libraries. PubMed via LHL: Hedges: Search filter United States (work in progress!) [Internet], Cited: October 19, 2020. Available from: <a href="https://guides.library.uab.edu/pubmed/hedges">https://guides.library.uab.edu/pubmed/hedges</a> [used, partly modified/adapted]</li> <li>- Ayiku L, Levay P, Hudson T, Craven J, Barrett E, Finnegan A and Adams R. The MEDLINE UK filter: development and validation of a geographic search filter to retrieve research about the UK from OVID MEDLINE. Health Information and Libraries Journal, 2017 34 (3): 200-216. [consulted, partly used/adapted]</li> </ul> |
|--|--------------------------------------------------------------------------------------------------------------------------------------------------------------------------------------------------------------------------------------------------------------------------------------------------------------------------------------------------------------------------------------------------------------------------------------------------------------------------------------------------------------------------------------------------------------------------------------------------------------------------------------------------------------------------------------------------------------------------------------------------------------------------------------------------------------------------------------------------------------------------------------------------------------------------------------------------------------------------------------------------------------------------------------------------------------------------------------------------------------------------------------------------------------------------------------------------------------------------------------------------------------------------------------------------------------------------------------------------------------------------------------------------------------------------------------------------------------------------------------------------------------------------------------------------------------------------------------------------------------------------------------------------------------|

| # | Search Terms                    | Hits  |
|---|---------------------------------|-------|
| 1 | *Cytomegalovirus/               | 12257 |
| 2 | exp *Human Cytomegalovirus/     | 4110  |
| 3 | exp *Cytomegalovirus Infection/ | 15640 |
| 4 | *Cytomegalovirus antibody/      | 592   |

|    |                                                                                                                                                                                                                                                                                                                 |       |
|----|-----------------------------------------------------------------------------------------------------------------------------------------------------------------------------------------------------------------------------------------------------------------------------------------------------------------|-------|
| 5  | *congenital cytomegalovirus infection/                                                                                                                                                                                                                                                                          | 80    |
| 6  | Cytomegalovirus/ and (Cytomegalovir\$ or cmv or hcmv or ccmv or human herpesvirus 5 or human herpes virus 5 or human herpesvirus type 5 or human herpes virus type 5 or human betaherpesvirus 5 or human beta-herpesvirus 5 or HHV 5 or HHV5 or salivary gland virus\$ or cytomegalic).ab.                      | 23862 |
| 7  | exp Human Cytomegalovirus/ and (Cytomegalovir\$ or cmv or hcmv or ccmv or human herpesvirus 5 or human herpes virus 5 or human herpesvirus type 5 or human herpes virus type 5 or human betaherpesvirus 5 or human beta-herpesvirus 5 or HHV 5 or HHV5 or salivary gland virus\$ or cytomegalic).ab.            | 6173  |
| 8  | exp Cytomegalovirus Infections/ and (Cytomegalovir\$ or cmv or hcmv or ccmv or human herpesvirus 5 or human herpes virus 5 or human herpesvirus type 5 or human herpes virus type 5 or human betaherpesvirus 5 or human beta-herpesvirus 5 or HHV 5 or HHV5 or salivary gland virus\$ or cytomegalic).ab.       | 22383 |
| 9  | Cytomegalovirus antibody/ and (Cytomegalovir\$ or cmv or hcmv or ccmv or human herpesvirus 5 or human herpes virus 5 or human herpesvirus type 5 or human herpes virus type 5 or human betaherpesvirus 5 or human beta-herpesvirus 5 or HHV 5 or HHV5 or salivary gland virus\$ or cytomegalic).ab.             | 1490  |
| 10 | congenital cytomegalovirus infection/ and (Cytomegalovir\$ or cmv or hcmv or ccmv or human herpesvirus 5 or human herpes virus 5 or human herpesvirus type 5 or human herpes virus type 5 or human betaherpesvirus 5 or human beta-herpesvirus 5 or HHV 5 or HHV5 or salivary gland virus\$ or cytomegalic).ab. | 75    |
| 11 | (Cytomegalovir\$ or cmv or hcmv or ccmv or human herpesvirus 5 or human herpes virus 5 or human herpesvirus type 5 or human herpes virus type 5 or human betaherpesvirus 5 or human beta-herpesvirus 5 or HHV 5 or HHV5 or salivary gland virus\$).ti.                                                          | 32775 |
| 12 | Cytomegalovir\$.ab. /freq=2                                                                                                                                                                                                                                                                                     | 5799  |
| 13 | Cytomegalovir\$.af. and (cmv or hcmv or ccmv or hhv 5 or hhv5).ab. /freq=2                                                                                                                                                                                                                                      | 28246 |

|    |                                                                                                                                                                                                                                                                                                                          |         |
|----|--------------------------------------------------------------------------------------------------------------------------------------------------------------------------------------------------------------------------------------------------------------------------------------------------------------------------|---------|
| 14 | (Cytomegalovirus\$ or cmv or hcmv or ccmv or human herpesvirus 5 or human herpes virus 5 or human herpesvirus type 5 or human herpes virus type 5 or human betaherpesvirus 5 or human beta-herpesvirus 5 or HHV 5 or HHV5 or salivary gland virus\$).ab. and (article-in-press or conference abstract or in-process).st. | 19306   |
| 15 | or/1-14                                                                                                                                                                                                                                                                                                                  | 63922   |
| 16 | Cytomegalovirus infection/ep                                                                                                                                                                                                                                                                                             | 1257    |
| 17 | congenital cytomegalovirus infection/ep                                                                                                                                                                                                                                                                                  | 12      |
| 18 | Seroepidemiology/                                                                                                                                                                                                                                                                                                        | 4236    |
| 19 | Congenital infection/ep                                                                                                                                                                                                                                                                                                  | 194     |
| 20 | Congenital disorder/ep                                                                                                                                                                                                                                                                                                   | 575     |
| 21 | Intrauterine infection/ep                                                                                                                                                                                                                                                                                                | 167     |
| 22 | Seroprevalence/                                                                                                                                                                                                                                                                                                          | 22356   |
| 23 | Prevalence/ or Incidence/                                                                                                                                                                                                                                                                                                | 1109154 |
| 24 | mortality/ or childhood mortality/ or embryo mortality/ or fetus mortality/ or hospital mortality/ or infant mortality/ or mortality rate/ or perinatal mortality/ or premature mortality/ or prenatal mortality/ or standardized mortality ratio/                                                                       | 892003  |
| 25 | Cytomegalovirus seropositivity/                                                                                                                                                                                                                                                                                          | 1       |
| 26 | Infection rate/                                                                                                                                                                                                                                                                                                          | 31638   |
| 27 | Newborn Screening/ or Prenatal Screening/                                                                                                                                                                                                                                                                                | 27856   |
| 28 | dried blood spot testing/                                                                                                                                                                                                                                                                                                | 4053    |
| 29 | Virus Shedding/                                                                                                                                                                                                                                                                                                          | 6939    |
| 30 | (prevalence\$ or prevalent or incidence\$ or incident or mortalit\$ or epidemiolog\$ or morbidity or seroepidemiolog\$ or seroprevalen\$ or seroinciden\$ or serosurvey\$ or sero survey or serosurveillance or sero surveillance).ti,ab,kw.                                                                             | 3578999 |



|    |                                                                                                                                                                       |         |
|----|-----------------------------------------------------------------------------------------------------------------------------------------------------------------------|---------|
| 31 | (cases adj4 (birth\$ or year\$ or positive or symptomatic or asymptomatic)).ti,ab.                                                                                    | 148133  |
| 32 | (CMV cases or HCMV cases or CCMV cases).ti,ab.                                                                                                                        | 86      |
| 33 | ((transmission or diagnosis) adj4 rate\$).ti,ab.                                                                                                                      | 24584   |
| 34 | (transmission adj3 risk).mp.                                                                                                                                          | 16413   |
| 35 | (infection rate\$ or disease rate\$).ti,ab,kw.                                                                                                                        | 35995   |
| 36 | Frequency.ti,ab.                                                                                                                                                      | 1084455 |
| 37 | ((neonat\$ or newborn\$ or prenatal or maternal) adj2 screening).ti,ab.                                                                                               | 23620   |
| 38 | Shedding.ti,ab,kw.                                                                                                                                                    | 30885   |
| 39 | or/16-38                                                                                                                                                              | 5041452 |
| 40 | cohort analysis/                                                                                                                                                      | 631612  |
| 41 | exp longitudinal study/                                                                                                                                               | 147096  |
| 42 | observational study/                                                                                                                                                  | 211927  |
| 43 | retrospective study/                                                                                                                                                  | 984448  |
| 44 | exp "medical record review"/                                                                                                                                          | 131597  |
| 45 | prospective study/                                                                                                                                                    | 638840  |
| 46 | cross-sectional study/                                                                                                                                                | 375902  |
| 47 | exp case control study/                                                                                                                                               | 181147  |
| 48 | Factual database/                                                                                                                                                     | 24636   |
| 49 | Major clinical study/                                                                                                                                                 | 3917630 |
| 50 | Controlled study/                                                                                                                                                     | 7775184 |
| 51 | (Long-term or observational or cohort? or longitudinal or prospective or retrospective or comparative or case-control or cross-sectional or followup or survey\$).ti. | 1202651 |

|    |                                                                                                                                                                                                                                                                                                                                                                                                                                                                                                                               |          |
|----|-------------------------------------------------------------------------------------------------------------------------------------------------------------------------------------------------------------------------------------------------------------------------------------------------------------------------------------------------------------------------------------------------------------------------------------------------------------------------------------------------------------------------------|----------|
| 52 | (real-world or real life).ti.                                                                                                                                                                                                                                                                                                                                                                                                                                                                                                 | 30845    |
| 53 | (cohort analys\$ or cohort stud\$ or longitudinal stud\$ or chart review\$ or medical record review\$ or observational stud\$ or retrospective analys\$ or retrospective chart review? or retrospective clinical stud\$ or retrospective cohort\$ or retrospective stud\$ or retrospective database\$ or retrospective observational\$ or cross-sectional stud\$ or cross-sectional setting\$ or case control stud\$ or case control setting or nested case control stud\$ or matched case-control stud\$ or case series).kw. | 48595    |
| 54 | (cohort adj (study or studies or analys\$)).ti,ab.                                                                                                                                                                                                                                                                                                                                                                                                                                                                            | 327648   |
| 55 | (cohort\$ adj2 (birth\$ or newborn\$)).ti,ab,kw.                                                                                                                                                                                                                                                                                                                                                                                                                                                                              | 23932    |
| 56 | ((longitudinal or cross sectional or case-control or pragmatic or large scale) adj (study or studies)).ti,ab.                                                                                                                                                                                                                                                                                                                                                                                                                 | 471566   |
| 57 | ((observational or retrospective or prospective) adj3 (study or studies or cohort\$1 or data\$ or analys#s)).ti,ab.                                                                                                                                                                                                                                                                                                                                                                                                           | 1373187  |
| 58 | ((real world or real life) adj3 (data\$ or setting or cohort\$ or stud\$ or experience\$ or result\$)).ti,ab.                                                                                                                                                                                                                                                                                                                                                                                                                 | 45411    |
| 59 | (data adj (report\$ or data system\$1)).ti,ab.                                                                                                                                                                                                                                                                                                                                                                                                                                                                                | 16089    |
| 60 | Electronic Medical Record/                                                                                                                                                                                                                                                                                                                                                                                                                                                                                                    | 57246    |
| 61 | (chart review or medical record review or (review adj5 patient records) or case series or consecutive patients or nonconsecutive patients).ti,ab,kw.                                                                                                                                                                                                                                                                                                                                                                          | 441587   |
| 62 | ((Population-based or nationwide or community based or national or hospital based) adj3 (stud\$3 or cohort\$ or data\$ or register\$ or database\$ or sample\$)).ti,ab.                                                                                                                                                                                                                                                                                                                                                       | 321346   |
| 63 | (Database analys#s or database stud\$ or claims data\$).ti,ab.                                                                                                                                                                                                                                                                                                                                                                                                                                                                | 34416    |
| 64 | (single center or single centre or single institution or hospital\$).ti.                                                                                                                                                                                                                                                                                                                                                                                                                                                      | 452825   |
| 65 | or/40-64                                                                                                                                                                                                                                                                                                                                                                                                                                                                                                                      | 11926188 |

|    |                                                                                                                                                                                                                                                |          |
|----|------------------------------------------------------------------------------------------------------------------------------------------------------------------------------------------------------------------------------------------------|----------|
| 66 | Disease registry/                                                                                                                                                                                                                              | 15169    |
| 67 | register/                                                                                                                                                                                                                                      | 114486   |
| 68 | (registries or registry or disease regist\$3 or register\$1 or national regist\$).ti,ab,kw.                                                                                                                                                    | 312980   |
| 69 | or/66-68                                                                                                                                                                                                                                       | 331704   |
| 70 | exp Health survey/                                                                                                                                                                                                                             | 226423   |
| 71 | exp disease surveillance/                                                                                                                                                                                                                      | 30534    |
| 72 | Population research/                                                                                                                                                                                                                           | 110304   |
| 73 | Newborn screening/                                                                                                                                                                                                                             | 19436    |
| 74 | dried blood spot testing/                                                                                                                                                                                                                      | 4053     |
| 75 | (health survey\$1 or survey\$1 or surveillance).ti,ab,hw.                                                                                                                                                                                      | 1695350  |
| 76 | Mass screening/ or Screening/                                                                                                                                                                                                                  | 234002   |
| 77 | Newborn screening/                                                                                                                                                                                                                             | 19436    |
| 78 | Prenatal screening/                                                                                                                                                                                                                            | 8662     |
| 79 | ((neonat\$ or newborn\$ or prenatal or maternal) adj3 screen\$).ti,ab.                                                                                                                                                                         | 27075    |
| 80 | ((CMV or HCMV or CCMV or cytomegalovirus) adj3 screen\$).ti,ab.                                                                                                                                                                                | 913      |
| 81 | Seroepidemiology/                                                                                                                                                                                                                              | 4236     |
| 82 | or/70-81                                                                                                                                                                                                                                       | 2056353  |
| 83 | 65 or 69 or 82                                                                                                                                                                                                                                 | 13205442 |
| 84 | (exp Animal/ or animal experiment/ or nonhuman/) not (exp Human/ or Human experiment/)                                                                                                                                                         | 6586246  |
| 85 | animal experiment/ and (mouse or mice or murine or rat or rats or rabbit or rabbits or cat or cats<br>or dog or dogs or swine or porcine or pig or pigs or piglet or piglets or lamb or lambs or cattle or<br>bovine or monkey or monkeys).ti. | 1089113  |

|    |                                                                                                                                                                                                                                                                                                                                                                                          |          |
|----|------------------------------------------------------------------------------------------------------------------------------------------------------------------------------------------------------------------------------------------------------------------------------------------------------------------------------------------------------------------------------------------|----------|
| 86 | or/84-85                                                                                                                                                                                                                                                                                                                                                                                 | 6638120  |
| 87 | 83 not 86                                                                                                                                                                                                                                                                                                                                                                                | 10453145 |
| 88 | exp Mathematical model/                                                                                                                                                                                                                                                                                                                                                                  | 412331   |
| 89 | Simulation/                                                                                                                                                                                                                                                                                                                                                                              | 186324   |
| 90 | model\$.kw.                                                                                                                                                                                                                                                                                                                                                                              | 283884   |
| 91 | (model or models or modelling or modeling).ti. not (((mouse or mice or murine or rat or rats or rabbit or rabbits or cat or cats or dog or dogs or swine or porcine or pig or pigs or piglet or piglets or lamb or lambs or cattle or bovine or monkey or monkeys or rhesus or macaque\$ or nonhuman or "in vitro" or animal\$ or organism\$) adj3 model\$).ti,kw. or exp Animal Model/) | 466020   |
| 92 | ((mathematic\$ or statistic\$ or transmission\$ or epidemiolog\$ or epidemic\$ or vaccination\$ or immuni\$ or theoretical\$) adj3 model\$).ti,ab,kw.                                                                                                                                                                                                                                    | 151635   |
| 93 | ((linear or nonlinear or static\$ or dynamic\$ or explicit or implicit or discrete\$ or continuous\$ or deterministic\$ or probabilistic\$ or stochastic\$ or deductive or inductive or floating or strateg\$ or nonstrateg\$ or conceptual\$ or quantitative\$ or qualitative\$ or individual\$ or structured or catalytic) adj3 model\$).ti,ab,kw.                                     | 259436   |
| 94 | or/88-93                                                                                                                                                                                                                                                                                                                                                                                 | 1323804  |
| 95 | 94 not ((exp Animal/ or animal experiment/ or nonhuman/) not (exp Human/ or Human experiment/))                                                                                                                                                                                                                                                                                          | 1098291  |
| 96 | 95 not (animal experiment/ and (mouse or mice or murine or rat or rats or rabbit or rabbits or cat or cats or dog or dogs or swine or porcine or pig or pigs or piglet or piglets or lamb or lambs or cattle or bovine or monkey or monkeys).ti.)                                                                                                                                        | 1094967  |
| 97 | 87 or 96                                                                                                                                                                                                                                                                                                                                                                                 | 11084755 |
| 98 | Systematic Review/                                                                                                                                                                                                                                                                                                                                                                       | 268566   |
| 99 | exp Meta Analysis/                                                                                                                                                                                                                                                                                                                                                                       | 200567   |

|     |                                                                                                                                                                                                                                          |         |
|-----|------------------------------------------------------------------------------------------------------------------------------------------------------------------------------------------------------------------------------------------|---------|
| 100 | biomedical technology assessment/                                                                                                                                                                                                        | 14706   |
| 101 | ((meta adj analy\$) or metaanalys\$).tw.                                                                                                                                                                                                 | 242391  |
| 102 | (systematic adj2 (review\$1 or overview\$1)).tw.                                                                                                                                                                                         | 241163  |
| 103 | (cochrane or embase or psychlit or psyclit or psychinfo or psycinfo or cinahl or cinhal or science citation index or bids or cancerlit or biosis or lilacs or web of science or scopus).ab.                                              | 215318  |
| 104 | (reference lists or bibliograph\$ or hand search\$ or manual search\$ or relevant journals).ab.                                                                                                                                          | 53452   |
| 105 | (selection criteria or eligibility criteria or data extraction).ab. and review.pt.                                                                                                                                                       | 34229   |
| 106 | ((systematic\$ or methodologic or quantitative or integrative or collaborative) adj5 (review or overview)) or technology assessment or bibliographic study).ti.                                                                          | 174285  |
| 107 | or/98-106                                                                                                                                                                                                                                | 559338  |
| 108 | (letter or editorial).pt.                                                                                                                                                                                                                | 1819537 |
| 109 | (exp Animal/ or animal experiment/ or nonhuman/) not (exp Human/ or Human experiment/)                                                                                                                                                   | 6586246 |
| 110 | animal experiment/ and (mouse or mice or murine or rat or rats or rabbit or rabbits or cat or cats or dog or dogs or swine or porcine or pig or pigs or piglet or piglets or lamb or lambs or cattle or bovine or monkey or monkeys).ti. | 1089113 |
| 111 | or/108-110                                                                                                                                                                                                                               | 8391193 |
| 112 | 107 not 111                                                                                                                                                                                                                              | 537607  |
| 113 | exp Australia/ or Australian/                                                                                                                                                                                                            | 177626  |
| 114 | Australia\$.ti,ab,kw,jw.                                                                                                                                                                                                                 | 303508  |
| 115 | exp Japan/                                                                                                                                                                                                                               | 173060  |
| 116 | "japanese (people)"/ or "Japanese (people)"/                                                                                                                                                                                             | 29532   |
| 117 | Japan\$.ti,ab,kw,jw.                                                                                                                                                                                                                     | 666680  |
| 118 | Israel/ or Israeli/                                                                                                                                                                                                                      | 32101   |

|     |                                                                                                                                                                                                                                                                                                                                                                                                                                                                                                                                                                                                                                                                                                                                                                                                                                                                                                                                                                                                                                                                                                                                                                                                                                                                                                                                                                                                                                                                                                                                 |         |
|-----|---------------------------------------------------------------------------------------------------------------------------------------------------------------------------------------------------------------------------------------------------------------------------------------------------------------------------------------------------------------------------------------------------------------------------------------------------------------------------------------------------------------------------------------------------------------------------------------------------------------------------------------------------------------------------------------------------------------------------------------------------------------------------------------------------------------------------------------------------------------------------------------------------------------------------------------------------------------------------------------------------------------------------------------------------------------------------------------------------------------------------------------------------------------------------------------------------------------------------------------------------------------------------------------------------------------------------------------------------------------------------------------------------------------------------------------------------------------------------------------------------------------------------------|---------|
| 119 | Israel\$.ti,ab,kw,jw.                                                                                                                                                                                                                                                                                                                                                                                                                                                                                                                                                                                                                                                                                                                                                                                                                                                                                                                                                                                                                                                                                                                                                                                                                                                                                                                                                                                                                                                                                                           | 48717   |
| 120 | or/113-119                                                                                                                                                                                                                                                                                                                                                                                                                                                                                                                                                                                                                                                                                                                                                                                                                                                                                                                                                                                                                                                                                                                                                                                                                                                                                                                                                                                                                                                                                                                      | 1096406 |
| 121 | exp Canada/                                                                                                                                                                                                                                                                                                                                                                                                                                                                                                                                                                                                                                                                                                                                                                                                                                                                                                                                                                                                                                                                                                                                                                                                                                                                                                                                                                                                                                                                                                                     | 185135  |
| 122 | Canada.ti,ab,kw.                                                                                                                                                                                                                                                                                                                                                                                                                                                                                                                                                                                                                                                                                                                                                                                                                                                                                                                                                                                                                                                                                                                                                                                                                                                                                                                                                                                                                                                                                                                | 115238  |
| 123 | Canadian\$.ti,ab,jw.                                                                                                                                                                                                                                                                                                                                                                                                                                                                                                                                                                                                                                                                                                                                                                                                                                                                                                                                                                                                                                                                                                                                                                                                                                                                                                                                                                                                                                                                                                            | 240802  |
| 124 | (CADTH or pCODR or INESSS).ti,ab.                                                                                                                                                                                                                                                                                                                                                                                                                                                                                                                                                                                                                                                                                                                                                                                                                                                                                                                                                                                                                                                                                                                                                                                                                                                                                                                                                                                                                                                                                               | 435     |
| 125 | (british columbia or alberta\$ or saskatchewan or manitoba\$ or ontario or quebec or new brunswick or nouveau brunswick or nova scotia or nouvelle ecosse or prince edward island or newfoundland or labrador or nunavut or nwt or northwest territories or yukon or nunavik or inuvialuit).ti,ab,kw,jw.                                                                                                                                                                                                                                                                                                                                                                                                                                                                                                                                                                                                                                                                                                                                                                                                                                                                                                                                                                                                                                                                                                                                                                                                                        | 96552   |
| 126 | (Abbotsford or Airdrie or Ajax or Aurora or Barrie or Belleville or Blainville or Brampton or Brantford or Brossard or Burlington or Burnaby or Caledon or Calgary or Cape Breton or Chatham Kent or Chilliwack or Clarington or Coquitlam or Drummondville or Edmonton or Fredericton or Fort McMurray or Gatineau or Granby or Grande Prairie or Sudbury or Guelph or Halton Hills or Iqaluit or Inuvik or Kamloops or Kawartha Lakes or Kelowna or Kingston or Kitchener or Langley or Laval or Lethbridge or Levis or Longueuil or Maple Ridge or Markham or Medicine Hat or Milton or Mirabel or Mississauga or Moncton or Montreal or Nanaimo or New Westminster or Newmarket or Niagara Falls or Norfolk County or North Bay or North Vancouver or North Vancouver or Oakville or Oshawa or Ottawa or Peterborough or Pickering or Port Coquitlam or Prince George or Quebec City or Red Deer or Regina or Repentigny or Richmond or Richmond Hill or Saanich or Saguenay or Saint John or Saint-Hyacinthe or Saint-Jean-sur-Richelieu or Saint-Jerome or Sarnia or Saskatoon or Sault Ste Marie or Sherbrooke or St Albert or St Catharines or St John's or Strathcona County or Surrey or Terrebonne or Thunder Bay or Toronto or Trois-Rivieres or Vancouver or Vaughan or ((Cambridge or (Halifax or Hamilton or London or Victoria or Waterloo or Welland or Whitby or Windsor)) not (UK or Britain or United Kingdom or England or Australia)) or Whitehorse or Winnipeg or Wood Buffalo or Yellowknife).ti,ab,kw. | 174701  |

|     |                                                                                                                                                                                                                                                                                                                                                                                                                                                                                                                                                                                                                                                                                                                                                                                                                                                                                                                                                                                                                                                                                                                                                                                                                                                                                                                                                              |         |
|-----|--------------------------------------------------------------------------------------------------------------------------------------------------------------------------------------------------------------------------------------------------------------------------------------------------------------------------------------------------------------------------------------------------------------------------------------------------------------------------------------------------------------------------------------------------------------------------------------------------------------------------------------------------------------------------------------------------------------------------------------------------------------------------------------------------------------------------------------------------------------------------------------------------------------------------------------------------------------------------------------------------------------------------------------------------------------------------------------------------------------------------------------------------------------------------------------------------------------------------------------------------------------------------------------------------------------------------------------------------------------|---------|
| 127 | exp United States/                                                                                                                                                                                                                                                                                                                                                                                                                                                                                                                                                                                                                                                                                                                                                                                                                                                                                                                                                                                                                                                                                                                                                                                                                                                                                                                                           | 1233547 |
| 128 | (united states or usa or us national or us census or us state\$ or US cohort\$ or US population or US adult\$ or US children).ti,ab,kw.                                                                                                                                                                                                                                                                                                                                                                                                                                                                                                                                                                                                                                                                                                                                                                                                                                                                                                                                                                                                                                                                                                                                                                                                                      | 548740  |
| 129 | (US or (U adj S)).ti.                                                                                                                                                                                                                                                                                                                                                                                                                                                                                                                                                                                                                                                                                                                                                                                                                                                                                                                                                                                                                                                                                                                                                                                                                                                                                                                                        | 85366   |
| 130 | (America\$ not (Central America\$ or South America\$ or Latin America\$)).ti.                                                                                                                                                                                                                                                                                                                                                                                                                                                                                                                                                                                                                                                                                                                                                                                                                                                                                                                                                                                                                                                                                                                                                                                                                                                                                | 125454  |
| 131 | ((midatlantic or mid-atlantic or middle-atlantic or Midwest\$3 or northeast\$3 or northwest\$3 or southeast\$3 or southern or southwest\$3) adj (state\$1 or region\$ or us or usa)).ti,ab,kw.                                                                                                                                                                                                                                                                                                                                                                                                                                                                                                                                                                                                                                                                                                                                                                                                                                                                                                                                                                                                                                                                                                                                                               | 19746   |
| 132 | (Appalachia\$ or great lakes or great plains or heartland or new England or pacific northwest or deep south or black belt or rust belt or district of Columbia or Washington DC or Alabama or Alaska or Arizona or Arkansas or little rock or California or san Francisco or San Diego or Los Angeles or Colorado or Connecticut or Florida or Hawaii or Honolulu or Idaho or Gainesville or Jacksonville or Tampa or Tallahassee or Georgia or Atlanta or Illinois or Chicago or Indiana or Indianapolis or West Lafayette or iowa or Kansas or Wichita or Kentucky or Louisiana or new Orleans or baton rouge or Shreveport or Maine or Orono or Johns Hopkins or Massachusetts or Boston or Harvard or Michigan or Detroit or Ann Arbor or East Lansing or Minnesota or Minneapolis or Rochester or Montana or Mississippi or Missouri or Missoula or Nebraska or Nevada or Las Vegas or New Hampshire or New Jersey or New Mexico or New York or North Carolina or North Dakota or Ohio or Cincinnati or Oklahoma or Oregon or Illinois or Chicago or Maryland or Pennsylvania or Philadelphia or South Carolina or South Dakota or Tennessee or Nashville or Memphis or Texas or Houston or Utah or Vermont or Virginia or Rhode Island or Washington or Seattle or West Virginia or Wisconsin or Wyoming or Delaware or Mayo Clinic or AHRQ).ti,ab,kw. | 686699  |
| 133 | ((Birmingham or Montgomery) adj al) or Huntsville or anchorage or fairbanks or Phoenix or Tuscon or Flagstaff or Berkeley or Stanford or Vail or Denver or Farmington or New Haven or Hartford or Wilmington or Newark or Miami or ((Athens or Augusta) adj ga) or Boise or Urbana or Evanston or Lexington or Louisville or Bardstown or (Scarborough adj me) or Bethesda or Baltimore or Rockville or (Worcester adj ma) or Burlington or St Paul or Saint Paul or (Jackson adj                                                                                                                                                                                                                                                                                                                                                                                                                                                                                                                                                                                                                                                                                                                                                                                                                                                                            | 122149  |

|     |                                                                                                                                                            |         |
|-----|------------------------------------------------------------------------------------------------------------------------------------------------------------|---------|
|     | ms) or (Columbia adj mo) or Bozeman or Omaha or Lincoln or Columbus or Cleveland or Portland or Hershey or providence or Richmond or Washington).ti,ab,kw. |         |
| 134 | Dollar\$.ti,ab.                                                                                                                                            | 23287   |
| 135 | (medicare or medicaid).ti,ab.                                                                                                                              | 85169   |
| 136 | North America/                                                                                                                                             | 35604   |
| 137 | North America\$.ti,ab,kw.                                                                                                                                  | 73512   |
| 138 | exp North American/                                                                                                                                        | 167865  |
| 139 | or/121-138                                                                                                                                                 | 2765646 |
| 140 | exp Europe/                                                                                                                                                | 1589093 |
| 141 | exp European/ or exp EU Citizen/                                                                                                                           | 180912  |
| 142 | (Europe\$3 or EU5).ti,ab,kw,jw.                                                                                                                            | 1402876 |
| 143 | exp France/ or Frenchman/                                                                                                                                  | 123535  |
| 144 | France.ti,ab,kw.                                                                                                                                           | 95119   |
| 145 | french.ti,ab,jw.                                                                                                                                           | 94639   |
| 146 | exp Germany/ or "german (citizen)"/                                                                                                                        | 187869  |
| 147 | German\$1.ti,ab,kw,jw.                                                                                                                                     | 248085  |
| 148 | exp Italy/ or "italian (citizen)"/                                                                                                                         | 118621  |
| 149 | (Italy or Italian\$).ti,ab,kw,jw.                                                                                                                          | 234377  |
| 150 | exp Spain/ or Spaniard/                                                                                                                                    | 99716   |
| 151 | (Spain or Spanish or Spaniard\$).ti,bt,ab,kw,jw.                                                                                                           | 139042  |
| 152 | exp United Kingdom/ or exp British Citizen/                                                                                                                | 423515  |
| 153 | (UK or U K).ti.                                                                                                                                            | 45264   |



|     |                                                                                                                                                                                                                                                                                                                                                                                                                                                                                                                                                                                                                                                                                                                                                                                                          |         |
|-----|----------------------------------------------------------------------------------------------------------------------------------------------------------------------------------------------------------------------------------------------------------------------------------------------------------------------------------------------------------------------------------------------------------------------------------------------------------------------------------------------------------------------------------------------------------------------------------------------------------------------------------------------------------------------------------------------------------------------------------------------------------------------------------------------------------|---------|
| 154 | (britain\$ or (british\$ not "british columbia") or united kingdom\$ or (england\$ not "new england") or northern ireland\$ or northern irish\$ or scotland\$ or scottish\$ or ((wales or "south wales") not "new south wales") or welsh\$).ti,ab,kw,jw.                                                                                                                                                                                                                                                                                                                                                                                                                                                                                                                                                 | 773210  |
| 155 | (English adj3 (Society or Association or patients)).ti,ab.                                                                                                                                                                                                                                                                                                                                                                                                                                                                                                                                                                                                                                                                                                                                               | 3233    |
| 156 | (English adj (population or hospital\$1 or citizen\$)).ti,ab.                                                                                                                                                                                                                                                                                                                                                                                                                                                                                                                                                                                                                                                                                                                                            | 928     |
| 157 | "National Institute for Health and Care Excellence".ti,ab.                                                                                                                                                                                                                                                                                                                                                                                                                                                                                                                                                                                                                                                                                                                                               | 3435    |
| 158 | ((Albania\$ or Andorra\$ or Armenia\$ or Austria\$ or Azerbaijan\$ or Belarus\$ or Belgium or Belgian\$ or Bosnia\$ and Herzegovin\$) or Bulgaria\$ or Croatia\$ or Cyprus or Cyprian\$ or Czechia\$ or Denmark or Danish or Estonia\$ or Finland or Finnish or Georgia\$ or Greece or Greek\$ or Hungary or Hungarian\$ or Iceland\$ or Ireland or Irish or Kosovo\$ or Latvia\$ or Liechtenstein or Lithuania\$ or Luxembourg\$ or Malta or Moldova\$ or Monaco or Montenegro or Netherlands or Dutch\$ or North Macedonia\$ or Norway or Norwegian\$ or Poland or Polish or Portugal or Portuguese or Romania\$ or San Marino or Scandinavia\$ or Serbia\$ or Slovakia\$ or Slovak Republic or Slovenia\$ or Sweden or Swedish or Switzerland or Swiss or Turkey or Turkish or Ukrain\$).ti,ab,kw,jw. | 1160585 |
| 159 | (euro or euros or EUR).ti,ab.                                                                                                                                                                                                                                                                                                                                                                                                                                                                                                                                                                                                                                                                                                                                                                            | 25923   |
| 160 | or/140-159                                                                                                                                                                                                                                                                                                                                                                                                                                                                                                                                                                                                                                                                                                                                                                                               | 4458308 |
| 161 | exp "South and Central America"/                                                                                                                                                                                                                                                                                                                                                                                                                                                                                                                                                                                                                                                                                                                                                                         | 239029  |
| 162 | exp South American/ or exp Central American/                                                                                                                                                                                                                                                                                                                                                                                                                                                                                                                                                                                                                                                                                                                                                             | 16648   |
| 163 | (Latin? America\$ or Latinoamerica\$ or South America\$ or Central America\$ or Caribbean\$).ti,ab,od,kw,jw.                                                                                                                                                                                                                                                                                                                                                                                                                                                                                                                                                                                                                                                                                             | 102333  |
| 164 | (Argentina or Argentinian\$ or Bolivia\$ or Brazil\$ or Brasil\$ or Chile or Chilean\$ or Colombia\$ or Ecuador or Ecuadorian\$ or Paraguay\$ or Peru or Peruvian\$ or Uruguay\$ or Venezuela\$ or Costa Rica\$ or El Salvador or Salvadorian\$ or Guatemala\$ or Guatemalteco\$ or Honduras\$ or Mexico or Mexican\$ or Nicaragua\$ or Panama\$5 or Dominican Republic or Dominican\$).ti,ab,od,kw,jw.                                                                                                                                                                                                                                                                                                                                                                                                  | 493744  |

|     |                                                                                                                                                                                                                                               |         |
|-----|-----------------------------------------------------------------------------------------------------------------------------------------------------------------------------------------------------------------------------------------------|---------|
| 165 | (Buenos Aires or La Paz or Sucre or Rio de Janeiro or Sao Paulo or Santiago or Valparaiso or Concepcion or Bogota or Quito or Asuncion or Lima or Montevideo or Caracas or San Salvador or Tegucigalpa or Managua or Santo Domingo).ti,ab,jw. | 61183   |
| 166 | or/161-165                                                                                                                                                                                                                                    | 581245  |
| 167 | (Global\$2 or worldwide or world wide).ti,ab,hw.                                                                                                                                                                                              | 866042  |
| 168 | International.ti.                                                                                                                                                                                                                             | 97848   |
| 169 | or/167-168                                                                                                                                                                                                                                    | 955232  |
| 170 | 120 or 139 or 160 or 166 or 169                                                                                                                                                                                                               | 8943734 |
| 171 | 97 and 170                                                                                                                                                                                                                                    | 3588594 |
| 172 | 112 or 171                                                                                                                                                                                                                                    | 4037733 |
| 173 | 15 and 39                                                                                                                                                                                                                                     | 21231   |
| 174 | 172 and 173                                                                                                                                                                                                                                   | 4334    |
| 175 | limit 174 to yr="2000 -Current"                                                                                                                                                                                                               | 3839    |
| 176 | 175 and conference abstract.pt,st.                                                                                                                                                                                                            | 1800    |
| 177 | limit 176 to yr="2000 - 2016"                                                                                                                                                                                                                 | 1150    |
| 178 | 175 not 177                                                                                                                                                                                                                                   | 2689    |
| 179 | limit 178 to English language                                                                                                                                                                                                                 | 2571    |

6

7

8 **Supplemental Table 3. Initial search strategy for LILACS**

|                             | LILACS (Latin American and Caribbean Health Sciences Literature)<br><br>(Medline not included)                                                                                                                                                                                                                                                                                                                                                                                                                                                                                                                                                                                                                                                                                                                                                                                                                                                                                                                                                                                                                                                                                                                                                                                                                                                                                                                                                                                                                                                                                                        |      |
|-----------------------------|-------------------------------------------------------------------------------------------------------------------------------------------------------------------------------------------------------------------------------------------------------------------------------------------------------------------------------------------------------------------------------------------------------------------------------------------------------------------------------------------------------------------------------------------------------------------------------------------------------------------------------------------------------------------------------------------------------------------------------------------------------------------------------------------------------------------------------------------------------------------------------------------------------------------------------------------------------------------------------------------------------------------------------------------------------------------------------------------------------------------------------------------------------------------------------------------------------------------------------------------------------------------------------------------------------------------------------------------------------------------------------------------------------------------------------------------------------------------------------------------------------------------------------------------------------------------------------------------------------|------|
| <b>Search Platform:</b>     | VHL – Virtual Library<br><br><a href="https://lilacs.bvsalud.org/en/">https://lilacs.bvsalud.org/en/</a>                                                                                                                                                                                                                                                                                                                                                                                                                                                                                                                                                                                                                                                                                                                                                                                                                                                                                                                                                                                                                                                                                                                                                                                                                                                                                                                                                                                                                                                                                              |      |
| <b>Date of Search:</b>      | October 27, 2020                                                                                                                                                                                                                                                                                                                                                                                                                                                                                                                                                                                                                                                                                                                                                                                                                                                                                                                                                                                                                                                                                                                                                                                                                                                                                                                                                                                                                                                                                                                                                                                      |      |
| <b>Date Range Searched:</b> | 2000-2020                                                                                                                                                                                                                                                                                                                                                                                                                                                                                                                                                                                                                                                                                                                                                                                                                                                                                                                                                                                                                                                                                                                                                                                                                                                                                                                                                                                                                                                                                                                                                                                             |      |
| #                           | Search Terms                                                                                                                                                                                                                                                                                                                                                                                                                                                                                                                                                                                                                                                                                                                                                                                                                                                                                                                                                                                                                                                                                                                                                                                                                                                                                                                                                                                                                                                                                                                                                                                          | Hits |
| 1                           | (mh:("Cytomegalovirus") OR mh:("Cytomegalovirus Infections") OR tw:("Cytomegalovirus") OR tw:("cmv") OR tw:("hcmv") OR tw:("ccmv") OR tw:("citomegalovirus") OR tw:("human herpesvirus 5") OR tw:("human herpes virus 5") OR tw:("human herpesvirus type 5") OR tw:("human herpes virus type 5") OR tw:("HHV 5") OR tw:("HHV5") OR tw:("salivary gland virus")) AND (mh:("Cytomegalovirus Infections/EP") OR mh:("Cytomegalovirus Infections/MO") OR mh:("Virus Diseases/EP") OR mh:("Virus Diseases/MO") OR mh:("Infant, Newborn, Diseases/EP") OR mh:("Infant, Newborn, Diseases/MO") OR mh:("Infant, Premature, Diseases/EP") OR mh:("Infant, Premature, Diseases/MO") OR mh:("Disease Transmission, Infectious/SN") OR mh:("Infectious Disease Transmission, Vertical/SN") OR mh:("Virus Shedding") OR mh:("Prevalence") OR mh:("Incidence") OR mh:("mortality") OR mh:("Seroepidemiologic Studies") OR mh:("Neonatal Screening") OR tw:(prevalenc*) OR tw:(prevalent) OR tw:(incidenc*) OR tw:(incident) OR tw:(mortalit*) OR tw:(epidemiolog*) OR tw:(seroepidemiolog*) OR tw:(seroprevalen*) OR tw:(seroinciden*) OR tw:(serosurvey*) OR tw:(sero-survey) OR tw:(serosurveillance) OR tw:(sero surveillance) OR tw:(seropositiv*) OR tw:(CMV cases) OR tw:(HCMV cases) OR tw:(CCMV cases) OR tw:(transmission rate*) OR tw:(infection rate*) OR tw:(disease rate*) OR tw:(frequency) OR tw:(neonatal screening) OR tw:(newborn screening) OR tw:(shedding) OR tw:(prenatal screening) OR tw:(maternal screening) OR tw:(dried blood spot testing)) AND ( db:("LILACS" OR "SES-SP" OR "BRISA")) | 522  |

|   |                                                                                                                                                                                                                                                                                                                                                                                                                                                                                                                                                                                                                                                                                                                                                                                                                                                                                                                                                                                                                                                                                                                                                                                                                                                                                                                                                                                                                                                                                                                                                                                                                                                |     |
|---|------------------------------------------------------------------------------------------------------------------------------------------------------------------------------------------------------------------------------------------------------------------------------------------------------------------------------------------------------------------------------------------------------------------------------------------------------------------------------------------------------------------------------------------------------------------------------------------------------------------------------------------------------------------------------------------------------------------------------------------------------------------------------------------------------------------------------------------------------------------------------------------------------------------------------------------------------------------------------------------------------------------------------------------------------------------------------------------------------------------------------------------------------------------------------------------------------------------------------------------------------------------------------------------------------------------------------------------------------------------------------------------------------------------------------------------------------------------------------------------------------------------------------------------------------------------------------------------------------------------------------------------------|-----|
| 2 | <p>(mh:("Cytomegalovirus") OR mh:("Cytomegalovirus Infections") OR tw:("Cytomegalovirus") OR tw:("cmv") OR tw:("hcmv") OR tw:("ccmv") OR tw:("citomegalovirus") OR tw:("human herpesvirus 5") OR tw:("human herpes virus 5") OR tw:("human herpesvirus type 5") OR tw:("human herpes virus type 5") OR tw:("HHV 5") OR tw:("HHV5") OR tw:("salivary gland virus")) AND (mh:("Cytomegalovirus Infections/EP") OR mh:("Cytomegalovirus Infections/MO") OR mh:("Virus Diseases/EP") OR mh:("Virus Diseases/MO") OR mh:("Infant, Newborn, Diseases/EP") OR mh:("Infant, Newborn, Diseases/MO") OR mh:("Infant, Premature, Diseases/EP") OR mh:("Infant, Premature, Diseases/MO") OR mh:("Disease Transmission, Infectious/SN") OR mh:("Infectious Disease Transmission, Vertical/SN") OR mh:("Virus Shedding") OR mh:("Prevalence") OR mh:("Incidence") OR mh:("mortality") OR mh:("Seroepidemiologic Studies") OR mh:("Neonatal Screening") OR tw:(prevalenc*) OR tw:(prevalent) OR tw:(incidenc*) OR tw:(incident) OR tw:(mortalit*) OR tw:(epidemiolog*) OR tw:(seroepidemiolog*) OR tw:(seroprevalen*) OR tw:(seroinciden*) OR tw:(serosurvey*) OR tw:(sero-survey) OR tw:(serosurveillance) OR tw:(sero surveillance) OR tw:(seropositiv*) OR tw:(CMV cases) OR tw:(HCMV cases) OR tw:(CCMV cases) OR tw:(transmission rate*) OR tw:(infection rate*) OR tw:(disease rate*) OR tw:(frequency) OR tw:(neonatal screening) OR tw:(newborn screening) OR tw:(shedding) OR tw:(prenatal screening) OR tw:(maternal screening) OR tw:(dried blood spot testing)) AND ( db:("LILACS" OR "SES-SP" OR "BRISA")) AND (year_cluster:[2000 TO 2020])</p> | 356 |
| 3 | <p>(mh:("Cytomegalovirus") OR mh:("Cytomegalovirus Infections") OR tw:("Cytomegalovirus") OR tw:("cmv") OR tw:("hcmv") OR tw:("ccmv") OR tw:("citomegalovirus") OR tw:("human herpesvirus 5") OR tw:("human herpes virus 5") OR tw:("human herpesvirus type 5") OR tw:("human herpes virus type 5") OR tw:("HHV 5") OR tw:("HHV5") OR tw:("salivary gland virus")) AND (mh:("Cytomegalovirus Infections/EP") OR mh:("Cytomegalovirus Infections/MO") OR mh:("Virus Diseases/EP") OR mh:("Virus Diseases/MO") OR mh:("Infant, Newborn, Diseases/EP") OR mh:("Infant, Newborn, Diseases/MO") OR mh:("Infant, Premature, Diseases/EP") OR mh:("Infant, Premature, Diseases/MO") OR mh:("Disease Transmission, Infectious/SN") OR mh:("Infectious Disease Transmission, Vertical/SN") OR mh:("Virus Shedding") OR mh:("Prevalence") OR mh:("Incidence") OR mh:("mortality") OR mh:("Seroepidemiologic</p>                                                                                                                                                                                                                                                                                                                                                                                                                                                                                                                                                                                                                                                                                                                                          | 108 |

|  |                                                                                                                                                                                                                                                                                                                                                                                                                                                                                                                                                                                                                                                                                                                                                                                             |  |
|--|---------------------------------------------------------------------------------------------------------------------------------------------------------------------------------------------------------------------------------------------------------------------------------------------------------------------------------------------------------------------------------------------------------------------------------------------------------------------------------------------------------------------------------------------------------------------------------------------------------------------------------------------------------------------------------------------------------------------------------------------------------------------------------------------|--|
|  | <p>Studies") OR mh:("Neonatal Screening") OR tw:(prevalenc*) OR tw:("prevalent") OR tw:(incidenc*) OR tw:("incident") OR tw:(mortalit*) OR tw:(epidemiolog*) OR tw:(seroepidemiolog*) OR tw:(seroprevalen*) OR tw:(seroinciden*) OR tw:(serosurvey*) OR tw:("sero-survey") OR tw:("serosurveillance") OR tw:("sero surveillance") OR tw:(seropositiv*) OR tw:("CMV cases") OR tw:("HCMV cases") OR tw:("CCMV cases") OR tw:(transmission rate*) OR tw:(infection rate*) OR tw:(disease rate*) OR tw:("frequency") OR tw:("neonatal screening") OR tw:("newborn screening") OR tw:("shedding") OR tw:("prenatal screening") OR tw:("maternal screening") OR tw:("dried blood spot testing")) AND ( db:("LILACS" OR "BRISA" OR "SES-SP") AND la:("en")) AND (year_cluster:[2000 TO 2020])</p> |  |
|--|---------------------------------------------------------------------------------------------------------------------------------------------------------------------------------------------------------------------------------------------------------------------------------------------------------------------------------------------------------------------------------------------------------------------------------------------------------------------------------------------------------------------------------------------------------------------------------------------------------------------------------------------------------------------------------------------------------------------------------------------------------------------------------------------|--|

9

10

11

12 **Widened search strategies**

13 **Supplemental Table 4. Widened search strategy for Medline (includes Medline in Process, Pubmed Not**  
 14 **Medline, In Data Review, Publisher)**

|                             |                                                                                                                                                                                                                                                                                                                                                                                                                                                                 |
|-----------------------------|-----------------------------------------------------------------------------------------------------------------------------------------------------------------------------------------------------------------------------------------------------------------------------------------------------------------------------------------------------------------------------------------------------------------------------------------------------------------|
|                             | Ovid MEDLINE®                                                                                                                                                                                                                                                                                                                                                                                                                                                   |
| <b>Search Platform:</b>     | Ovid                                                                                                                                                                                                                                                                                                                                                                                                                                                            |
| <b>Date of Search:</b>      | December 14, 2020<br><br>[Last Database Update: December 11, 2020]                                                                                                                                                                                                                                                                                                                                                                                              |
| <b>Date Range Searched:</b> | 1946 to current, restricted to 2000-2020                                                                                                                                                                                                                                                                                                                                                                                                                        |
| <b>Search Filters:</b>      | <p>In development of the search strategies the following search filters were used and partly modified:</p> <p>Systematic Reviews</p> <ul style="list-style-type: none"> <li>- SIGN Search Strategy Systematic Reviews, OVID format. Scottish Intermediate Guidelines Network (SIGN), Filter Systematic Reviews.</li> </ul> <p>Available from: <a href="http://sign.ac.uk/search-filters.html">http://sign.ac.uk/search-filters.html</a> (Word document last</p> |

|  |                                                                                                                                                                                                                                                                                                                                                                                                                                                                                                                                                                                                                                                                                                                                                                                                                                                                                                                                                                                                                                                                                                                                                                                                                                                                                         |
|--|-----------------------------------------------------------------------------------------------------------------------------------------------------------------------------------------------------------------------------------------------------------------------------------------------------------------------------------------------------------------------------------------------------------------------------------------------------------------------------------------------------------------------------------------------------------------------------------------------------------------------------------------------------------------------------------------------------------------------------------------------------------------------------------------------------------------------------------------------------------------------------------------------------------------------------------------------------------------------------------------------------------------------------------------------------------------------------------------------------------------------------------------------------------------------------------------------------------------------------------------------------------------------------------------|
|  | <p>modified April 25, 2017; cited May 13, 2020) [supplemented by additional search terms]</p> <p>Country restrictions:</p> <ul style="list-style-type: none"> <li>- Campbell, Sandy. Filter to Retrieve Studies Related to Canada, Canadian Provinces, and the One Hundred Largest Canadian Centres from the OVID MEDLINE Database. John W. Scott Health Sciences Library, University of Alberta. Rev. March 06, 2020. Available from:<br/><a href="http://guides.library.ualberta.ca/health-sciences-search-filters/geographic-filters">http://guides.library.ualberta.ca/health-sciences-search-filters/geographic-filters</a> [used, partly modified]</li> <li>- UAB Libraries. PubMed via LHL: Hedges: Search filter United States (work in progress!)[Internet], Cited: October 19, 2020. Available from:<br/><a href="https://guides.library.uab.edu/pubmed/hedges">https://guides.library.uab.edu/pubmed/hedges</a> [used, partly modified]</li> <li>- Ayiku L, Levay P, Hudson T, Craven J, Barrett E, Finnegan A and Adams R. The MEDLINE UK filter: development and validation of a geographic search filter to retrieve research about the UK from OVID MEDLINE. Health Information and Libraries Journal, 2017 34 (3): 200-216. [consulted, partly used/adapted]</li> </ul> |
|--|-----------------------------------------------------------------------------------------------------------------------------------------------------------------------------------------------------------------------------------------------------------------------------------------------------------------------------------------------------------------------------------------------------------------------------------------------------------------------------------------------------------------------------------------------------------------------------------------------------------------------------------------------------------------------------------------------------------------------------------------------------------------------------------------------------------------------------------------------------------------------------------------------------------------------------------------------------------------------------------------------------------------------------------------------------------------------------------------------------------------------------------------------------------------------------------------------------------------------------------------------------------------------------------------|

| # | Search Terms                                                                                                                                                                                                                                                                               | Hits  |
|---|--------------------------------------------------------------------------------------------------------------------------------------------------------------------------------------------------------------------------------------------------------------------------------------------|-------|
| 1 | *Cytomegalovirus/                                                                                                                                                                                                                                                                          | 12980 |
| 2 | exp *Cytomegalovirus Infections/                                                                                                                                                                                                                                                           | 19943 |
| 3 | Cytomegalovir\$.kf.                                                                                                                                                                                                                                                                        | 3743  |
| 4 | Cytomegalovirus/ and (Cytomegalovir\$ or cmv or hcmv or ccmv or human herpesvirus 5 or human herpes virus 5 or human herpesvirus type 5 or human herpes virus type 5 or human betaherpesvirus 5 or human beta-herpesvirus 5 or HHV 5 or HHV5 or salivary gland virus\$ or cytomegalic).ab. | 16642 |
| 5 | exp Cytomegalovirus Infections/ and (Cytomegalovir\$ or cmv or hcmv or ccmv or human herpesvirus 5 or human herpes virus 5 or human herpesvirus type 5 or human herpes virus type 5                                                                                                        | 17708 |

|    |                                                                                                                                                                                                                                                                                                                                      |        |
|----|--------------------------------------------------------------------------------------------------------------------------------------------------------------------------------------------------------------------------------------------------------------------------------------------------------------------------------------|--------|
|    | or human betaherpesvirus 5 or human beta-herpesvirus 5 or HHV 5 or HHV5 or salivary gland virus\$ or cytomegalic).ab.                                                                                                                                                                                                                |        |
| 6  | (Cytomegalovir\$ or cmv or hcmv or ccmv or human herpesvirus 5 or human herpes virus 5 or human herpesvirus type 5 or human herpes virus type 5 or human betaherpesvirus 5 or human beta-herpesvirus 5 or HHV 5 or HHV5 or salivary gland virus\$).ti,kf.                                                                            | 27977  |
| 7  | Cytomegalovir\$.ab. /freq=2                                                                                                                                                                                                                                                                                                          | 4996   |
| 8  | Cytomegalovir\$.af. and (cmv or hcmv or ccmv or hhv 5 or hhv5).ab. /freq=2                                                                                                                                                                                                                                                           | 20895  |
| 9  | (Cytomegalovir\$ or cmv or hcmv or ccmv or human herpesvirus 5 or human herpes virus 5 or human herpesvirus type 5 or human herpes virus type 5 or human betaherpesvirus 5 or human beta-herpesvirus 5 or HHV 5 or HHV5 or salivary gland virus\$).ab. and ("in data review" or in process or publisher or "pubmed not medline").st. | 3956   |
| 10 | or/1-9                                                                                                                                                                                                                                                                                                                               | 39889  |
| 11 | exp Cytomegalovirus Infections/ep, mo                                                                                                                                                                                                                                                                                                | 3375   |
| 12 | Virus Diseases/ep, mo                                                                                                                                                                                                                                                                                                                | 4534   |
| 13 | Infant, Newborn, Diseases/ep, mo                                                                                                                                                                                                                                                                                                     | 4540   |
| 14 | Infant, Premature, Diseases/ep, mo                                                                                                                                                                                                                                                                                                   | 3666   |
| 15 | Pregnancy Complications, Infectious/ep, mo, sn                                                                                                                                                                                                                                                                                       | 7956   |
| 16 | Infectious Disease Transmission, Vertical/sn                                                                                                                                                                                                                                                                                         | 1159   |
| 17 | Disease Transmission, Infectious/sn                                                                                                                                                                                                                                                                                                  | 778    |
| 18 | exp prenatal diagnosis/sn                                                                                                                                                                                                                                                                                                            | 2039   |
| 19 | Prevalence/                                                                                                                                                                                                                                                                                                                          | 298610 |
| 20 | Incidence/                                                                                                                                                                                                                                                                                                                           | 267969 |
| 21 | Mortality/ or Child Mortality/ or Fetal Mortality/ or Hospital Mortality.mp. or exp Infant Mortality/ or mortality, premature/ [mp=title, abstract, original title, name of substance word,                                                                                                                                          | 135092 |

|    |                                                                                                                                                                                                                                                                       |         |
|----|-----------------------------------------------------------------------------------------------------------------------------------------------------------------------------------------------------------------------------------------------------------------------|---------|
|    | subject heading word, floating sub-heading word, keyword heading word, organism<br>supplementary concept word, protocol supplementary concept word, rare disease<br>supplementary concept word, unique identifier, synonyms]                                          |         |
| 22 | Seroepidemiologic Studies/                                                                                                                                                                                                                                            | 20911   |
| 23 | Neonatal Screening/                                                                                                                                                                                                                                                   | 10350   |
| 24 | dried blood spot testing/                                                                                                                                                                                                                                             | 1540    |
| 25 | Virus shedding/                                                                                                                                                                                                                                                       | 3504    |
| 26 | (prevalence\$ or prevalent or incidence\$ or incident or mortalit\$ or epidemiolog\$ or<br>seroepidemiolog\$ or seroprevalen\$ or seroinciden\$ or serosurvey\$ or sero-survey\$ or<br>serosurveillance or sero surveillance or morbidity or seropositiv\$).ti,ab,kf. | 2613697 |
| 27 | (cases adj4 (birth\$ or year\$ or positive or symptomatic or asymptomatic)).ti,ab.                                                                                                                                                                                    | 94560   |
| 28 | (CMV cases or HCMV cases or CCMV cases).ti,ab.                                                                                                                                                                                                                        | 51      |
| 29 | ((transmission or diagnosis) adj4 rate\$).ti,ab.                                                                                                                                                                                                                      | 17458   |
| 30 | (transmission adj3 risk).mp.                                                                                                                                                                                                                                          | 13192   |
| 31 | (infection rate\$ or disease rate\$).ti,ab,kf.                                                                                                                                                                                                                        | 27333   |
| 32 | Frequency.ti,ab.                                                                                                                                                                                                                                                      | 844420  |
| 33 | ((neonat\$ or newborn\$ or prenatal or maternal) adj2 screening).ti,ab.                                                                                                                                                                                               | 16150   |
| 34 | Shedding.ti,ab,kf.                                                                                                                                                                                                                                                    | 26482   |
| 35 | or/11-34                                                                                                                                                                                                                                                              | 3591794 |
| 36 | Epidemiologic studies/                                                                                                                                                                                                                                                | 8484    |
| 37 | exp case control studies/                                                                                                                                                                                                                                             | 1123668 |
| 38 | exp cohort studies/                                                                                                                                                                                                                                                   | 2061902 |
| 39 | Retrospective Studies/                                                                                                                                                                                                                                                | 855466  |



|    |                                                                                                                                                                                                                                                                                                                                                                                                                                                                                                                |        |
|----|----------------------------------------------------------------------------------------------------------------------------------------------------------------------------------------------------------------------------------------------------------------------------------------------------------------------------------------------------------------------------------------------------------------------------------------------------------------------------------------------------------------|--------|
| 40 | Cross-sectional studies/                                                                                                                                                                                                                                                                                                                                                                                                                                                                                       | 345417 |
| 41 | observational studies as topic/ or observational study/                                                                                                                                                                                                                                                                                                                                                                                                                                                        | 94584  |
| 42 | evaluation studies/                                                                                                                                                                                                                                                                                                                                                                                                                                                                                            | 255132 |
| 43 | Databases, Factual/ or Data Collection/                                                                                                                                                                                                                                                                                                                                                                                                                                                                        | 172209 |
| 44 | (Long-term or observational or cohort? or longitudinal or prospective or retrospective or comparative or case-control or cross-sectional or survey\$).ti.                                                                                                                                                                                                                                                                                                                                                      | 949679 |
| 45 | (real-world or real life).ti.                                                                                                                                                                                                                                                                                                                                                                                                                                                                                  | 14811  |
| 46 | (cohort analys\$ or cohort stud\$ or longitudinal stud\$ or chart review\$ or medical record review\$ or observational stud\$ or retrospective analys\$ or retrospective chart review? or retrospective clinical stud\$ or retrospective cohort\$ or retrospective stud\$ or retrospective database\$ or retrospective observational\$ or cross-sectional stud\$ or cross-sectional setting\$ or case control stud\$ or case control setting or nested case control stud\$ or matched case-control stud\$).kf. | 25801  |
| 47 | (cohort adj (study or studies or analy\$)).ti,ab.                                                                                                                                                                                                                                                                                                                                                                                                                                                              | 228073 |
| 48 | (cohort\$ adj2 (birth\$ or newborn\$)).ti,ab,kw.                                                                                                                                                                                                                                                                                                                                                                                                                                                               | 18883  |
| 49 | ((longitudinal or cross sectional or case-control or pragmatic or large scale) adj (study or studies)).ti,ab.                                                                                                                                                                                                                                                                                                                                                                                                  | 363700 |
| 50 | ((observational or retrospective or prospective) adj3 (study or studies or cohort\$1 or data\$ or analys#s)).ti,ab.                                                                                                                                                                                                                                                                                                                                                                                            | 885570 |
| 51 | ((real world or real life) adj3 (data\$ or setting or cohort\$ or stud\$ or experience\$ or result\$)).ti,ab.                                                                                                                                                                                                                                                                                                                                                                                                  | 22053  |
| 52 | (data adj (report\$ or data system\$1)).ti,ab.                                                                                                                                                                                                                                                                                                                                                                                                                                                                 | 11651  |
| 53 | Electronic health records/                                                                                                                                                                                                                                                                                                                                                                                                                                                                                     | 20670  |
| 54 | (chart review or medical record review or (review adj5 patient records) or case series or consecutive patients or nonconsecutive patients).ti,ab.                                                                                                                                                                                                                                                                                                                                                              | 277731 |

|    |                                                                                                                                                                       |         |
|----|-----------------------------------------------------------------------------------------------------------------------------------------------------------------------|---------|
| 55 | ((Population-based or nationwide or community based or national or hospital based) adj3 (stud\$3 or cohort\$ or data or register\$ or database\$ or sample\$)).ti,ab. | 230038  |
| 56 | (Database analys#s or database stud\$ or claims data\$).ti,ab.                                                                                                        | 19291   |
| 57 | (single center or single centre or single institution or hospital\$).ti.                                                                                              | 356867  |
| 58 | or/36-57                                                                                                                                                              | 4204061 |
| 59 | exp registries/                                                                                                                                                       | 99324   |
| 60 | (registries or registry or disease registr\$3 or register\$1).ti,ab,kf.                                                                                               | 204624  |
| 61 | or/59-60                                                                                                                                                              | 240800  |
| 62 | Health Surveys/                                                                                                                                                       | 63381   |
| 63 | exp population surveillance/                                                                                                                                          | 70355   |
| 64 | exp "Surveys and Questionnaires"/                                                                                                                                     | 1057916 |
| 65 | (health survey\$1 or survey\$1 or surveillance).ti,ab,kf.                                                                                                             | 799674  |
| 66 | exp Seroepidemiologic Studies/                                                                                                                                        | 23865   |
| 67 | Neonatal Screening/                                                                                                                                                   | 10350   |
| 68 | Mass screening/                                                                                                                                                       | 105122  |
| 69 | dried blood spot testing/                                                                                                                                             | 1540    |
| 70 | ((neonat\$ or newborn\$ or prenatal or maternal) adj3 screen\$).ti,ab.                                                                                                | 18499   |
| 71 | ((CMV or HCMV or CCMV or cytomegalovirus) adj3 screen\$).ti,ab.                                                                                                       | 617     |
| 72 | or/62-71                                                                                                                                                              | 1628559 |
| 73 | 58 or 61 or 72                                                                                                                                                        | 5173205 |
| 74 | 73 not (exp animals/ not humans/)                                                                                                                                     | 4981629 |
| 75 | Mathematical Concepts/                                                                                                                                                | 4104    |

|    |                                                                                                                                                                                                                                                                                                                                                                                                    |         |
|----|----------------------------------------------------------------------------------------------------------------------------------------------------------------------------------------------------------------------------------------------------------------------------------------------------------------------------------------------------------------------------------------------------|---------|
| 76 | Models, Theoretical/                                                                                                                                                                                                                                                                                                                                                                               | 152959  |
| 77 | exp Models, Statistical/                                                                                                                                                                                                                                                                                                                                                                           | 415883  |
| 78 | Computer Simulation/                                                                                                                                                                                                                                                                                                                                                                               | 190572  |
| 79 | model\$.kw.                                                                                                                                                                                                                                                                                                                                                                                        | 19445   |
| 80 | (model or models or modelling or modeling).ti. not (((mouse or mice or murine or rat or rats or rabbit or rabbits or cat or cats or dog or dogs or swine or porcine or pig or pigs or piglet or piglets or lamb or lambs or cattle or bovine or monkey or monkeys or rhesus or macaque\$ or nonhuman or "in vitro" or animal\$ or organism\$) adj3 model\$).ti,kf. or exp Disease Models, Animal/) | 425294  |
| 81 | ((mathematic\$ or statistic\$ or transmission\$ or epidemiolog\$ or epidemic\$ or vaccination\$ or immuni\$ or theoretical\$) adj3 model\$).ti,ab,kf.                                                                                                                                                                                                                                              | 131135  |
| 82 | ((linear or nonlinear or static\$ or dynamic\$ or explicit or implicit or discrete\$ or continuous\$ or deterministic\$ or probabilistic\$ or stochastic\$ or deductive or inductive or floating or strateg\$ or nonstrateg\$ or conceptual\$ or quantitative\$ or qualitative\$ or individual\$ or structured or catalytic) adj3 model\$).ti,ab,kf.                                               | 208783  |
| 83 | or/75-82                                                                                                                                                                                                                                                                                                                                                                                           | 1225858 |
| 84 | 83 not (exp animals/ not humans/)                                                                                                                                                                                                                                                                                                                                                                  | 1099786 |
| 85 | 84 not (animals/ and (mouse or mice or murine or rat or rats or rabbit or rabbits or cat or cats or dog or dogs or swine or porcine or pig or pigs or piglet or piglets or lamb or lambs or cattle or bovine or monkey or monkeys or rhesus or macaque\$ or nonhuman or "in vitro" or animal\$ or organism\$ or "in vivo").ti.)                                                                    | 1093007 |
| 86 | Meta-Analysis as Topic/                                                                                                                                                                                                                                                                                                                                                                            | 18668   |
| 87 | Systematic Review/                                                                                                                                                                                                                                                                                                                                                                                 | 140336  |
| 88 | Meta-Analysis/                                                                                                                                                                                                                                                                                                                                                                                     | 123148  |
| 89 | exp Technology Assessment, Biomedical/                                                                                                                                                                                                                                                                                                                                                             | 11228   |

|     |                                                                                                                                                                                             |        |
|-----|---------------------------------------------------------------------------------------------------------------------------------------------------------------------------------------------|--------|
| 90  | (meta analy\$ or metaanaly\$).tw.                                                                                                                                                           | 188708 |
| 91  | (systematic adj2 (review\$1 or overview\$1)).tw.                                                                                                                                            | 197318 |
| 92  | exp Review Literature as Topic/                                                                                                                                                             | 14904  |
| 93  | (cochrane or embase or psychlit or psyclit or psychinfo or psycinfo or cinahl or cinhal or science citation index or bids or cancerlit or biosis or lilacs or web of science or scopus).ab. | 182044 |
| 94  | (reference list\$ or bibliograph\$ or hand-search\$ or relevant journals or manual search\$).ab.                                                                                            | 45378  |
| 95  | (selection criteria or eligibility criteria or data extraction).ab. and review/                                                                                                             | 33837  |
| 96  | ((systematic\$ or methodologic or quantitative or integrative or collaborative) adj5 (review or overview)) or technology assessment or bibliographic study).ti.                             | 148538 |
| 97  | or/86-96                                                                                                                                                                                    | 418639 |
| 98  | 97 not (comment/ or letter/ or editorial/)                                                                                                                                                  | 402200 |
| 99  | 98 not (exp animals/ not humans.sh.)                                                                                                                                                        | 397530 |
| 100 | exp Australia/                                                                                                                                                                              | 147128 |
| 101 | Australia\$.ti,bt,ab,kw,jw.                                                                                                                                                                 | 246696 |
| 102 | exp Japan/                                                                                                                                                                                  | 137158 |
| 103 | Japan\$.ti,bt,ab,kw,jw.                                                                                                                                                                     | 518057 |
| 104 | Israel/                                                                                                                                                                                     | 29593  |
| 105 | Israel\$.ti,bt,ab,kw,jw.                                                                                                                                                                    | 44300  |
| 106 | or/100-105                                                                                                                                                                                  | 882734 |
| 107 | exp Canada/                                                                                                                                                                                 | 161041 |
| 108 | Canada.ti,bt,ab,kw.                                                                                                                                                                         | 88995  |
| 109 | Canadian\$1.ti,bt,ab,jw,kf.                                                                                                                                                                 | 261725 |

|     |                                                                                                                                                                                                                                                                                                                                                                                                                                                                                                                                                                                                                                                                                                                                                                                                                                                                                                                                                                                                                                                                                                                                                                                                                                                                                                                                                                                                                                                                                                                                 |        |
|-----|---------------------------------------------------------------------------------------------------------------------------------------------------------------------------------------------------------------------------------------------------------------------------------------------------------------------------------------------------------------------------------------------------------------------------------------------------------------------------------------------------------------------------------------------------------------------------------------------------------------------------------------------------------------------------------------------------------------------------------------------------------------------------------------------------------------------------------------------------------------------------------------------------------------------------------------------------------------------------------------------------------------------------------------------------------------------------------------------------------------------------------------------------------------------------------------------------------------------------------------------------------------------------------------------------------------------------------------------------------------------------------------------------------------------------------------------------------------------------------------------------------------------------------|--------|
| 110 | (british columbia or alberta\$ or saskatchewan or manitoba\$ or ontario or quebec or new brunswick or nouveau brunswick or nova scotia or nouvelle ecosse or prince edward island or newfoundland or labrador or nunavut or nwt or northwest territories or yukon or nunavik or inuvialuit).ti,ab,kw,jw.                                                                                                                                                                                                                                                                                                                                                                                                                                                                                                                                                                                                                                                                                                                                                                                                                                                                                                                                                                                                                                                                                                                                                                                                                        | 79587  |
| 111 | (Abbotsford or Airdrie or Ajax or Aurora or Barrie or Belleville or Blainville or Brampton or Brantford or Brossard or Burlington or Burnaby or Caledon or Calgary or Cape Breton or Chatham Kent or Chilliwack or Clarington or Coquitlam or Drummondville or Edmonton or Fredericton or Fort McMurray or Gatineau or Granby or Grande Prairie or Sudbury or Guelph or Halton Hills or Iqaluit or Inuvik or Kamloops or Kawartha Lakes or Kelowna or Kingston or Kitchener or Langley or Laval or Lethbridge or Levis or Longueuil or Maple Ridge or Markham or Medicine Hat or Milton or Mirabel or Mississauga or Moncton or Montreal or Nanaimo or New Westminster or Newmarket or Niagara Falls or Norfolk County or North Bay or North Vancouver or North Vancouver or Oakville or Oshawa or Ottawa or Peterborough or Pickering or Port Coquitlam or Prince George or Quebec City or Red Deer or Regina or Repentigny or Richmond or Richmond Hill or Saanich or Saguenay or Saint John or Saint-Hyacinthe or Saint-Jean-sur-Richelieu or Saint-Jerome or Sarnia or Saskatoon or Sault Ste Marie or Sherbrooke or St Albert or St Catharines or St John's or Strathcona County or Surrey or Terrebonne or Thunder Bay or Toronto or Trois-Rivieres or Vancouver or Vaughan or ((Cambridge or (Halifax or Hamilton or London or Victoria or Waterloo or Welland or Whitby or Windsor)) not (UK or Britain or United Kingdom or England or Australia)) or Whitehorse or Winnipeg or Wood Buffalo or Yellowknife).ti,ab,kw. | 115323 |
| 112 | (Abbotsford or Airdrie or Ajax or Aurora or Barrie or Belleville or Blainville or Brampton or Brantford or Brossard or Burlington or Burnaby or Caledon or Calgary or Cape Breton or Chatham Kent or Chilliwack or Clarington or Coquitlam or Drummondville or Edmonton or Fredericton or Fort McMurray or Gatineau or Granby or Grande Prairie or Sudbury or Guelph or Halton Hills or Iqaluit or Inuvik or Kamloops or Kawartha Lakes or Kelowna or Kingston or Kitchener or Langley or Laval or Lethbridge or Levis or Longueuil or Maple Ridge or Markham or Medicine Hat or Milton or Mirabel or Mississauga or Moncton or Montreal or Nanaimo or New Westminster or Newmarket or Niagara Falls or Norfolk County or North Bay or North Vancouver or North                                                                                                                                                                                                                                                                                                                                                                                                                                                                                                                                                                                                                                                                                                                                                                 | 115323 |

|     |                                                                                                                                                                                                                                                                                                                                                                                                                                                                                                                                                                                                                                                                                                                                                                                                                                                                                                                                                                                                                                                                                                                                                      |         |
|-----|------------------------------------------------------------------------------------------------------------------------------------------------------------------------------------------------------------------------------------------------------------------------------------------------------------------------------------------------------------------------------------------------------------------------------------------------------------------------------------------------------------------------------------------------------------------------------------------------------------------------------------------------------------------------------------------------------------------------------------------------------------------------------------------------------------------------------------------------------------------------------------------------------------------------------------------------------------------------------------------------------------------------------------------------------------------------------------------------------------------------------------------------------|---------|
|     | Vancouver or Oakville or Oshawa or Ottawa or Peterborough or Pickering or Port Coquitlam or Prince George or Quebec City or Red Deer or Regina or Repentigny or Richmond or Richmond Hill or Saanich or Saguenay or Saint John or Saint-Hyacinthe or Saint-Jean-sur-Richelieu or Saint-Jerome or Sarnia or Saskatoon or Sault Ste Marie or Sherbrooke or St Albert or St Catharines or St John's or Strathcona County or Surrey or Terrebonne or Thunder Bay or Toronto or Trois-Rivieres or Vancouver or Vaughan or ((Cambridge or (Halifax or Hamilton or London or Victoria or Waterloo or Welland or Whitby or Windsor)) not (UK or Britain or United Kingdom or England or Australia)) or Whitehorse or Winnipeg or Wood Buffalo or Yellowknife).ti,ab,kw.                                                                                                                                                                                                                                                                                                                                                                                      |         |
| 113 | exp United States/                                                                                                                                                                                                                                                                                                                                                                                                                                                                                                                                                                                                                                                                                                                                                                                                                                                                                                                                                                                                                                                                                                                                   | 1363122 |
| 114 | (united states or usa or us national or us census or us state\$ or US cohort\$ or US population or US adult\$ or US children).ti,ab,kw.                                                                                                                                                                                                                                                                                                                                                                                                                                                                                                                                                                                                                                                                                                                                                                                                                                                                                                                                                                                                              | 386833  |
| 115 | (US or (U adj S)).ti.                                                                                                                                                                                                                                                                                                                                                                                                                                                                                                                                                                                                                                                                                                                                                                                                                                                                                                                                                                                                                                                                                                                                | 69485   |
| 116 | (America\$ not (Central America\$ or South America\$ or Latin America\$)).ti.                                                                                                                                                                                                                                                                                                                                                                                                                                                                                                                                                                                                                                                                                                                                                                                                                                                                                                                                                                                                                                                                        | 110613  |
| 117 | ((midatlantic or mid-atlantic or middle-atlantic or Midwest\$3 or northeast\$3 or northwest\$3 or southeast\$3 or southern or southwest\$3) adj (state\$1 or region\$ or us or usa)).ti,ab,kw.                                                                                                                                                                                                                                                                                                                                                                                                                                                                                                                                                                                                                                                                                                                                                                                                                                                                                                                                                       | 16121   |
| 118 | (Appalachia\$ or great lakes or great plains or heartland or new England or pacific northwest or deep south or black belt or rust belt or district of Columbia or Washington DC or Alabama or Alaska or Arizona or Arkansas or little rock or California or san Francisco or San Diego or Los Angeles or Colorado or Connecticut or Florida or Hawaii or Honolulu or Idaho or Gainesville or Jacksonville or Tampa or Tallahassee or Georgia or Atlanta or Illinois or Chicago or Indiana or Indianapolis or West Lafayette or iowa or Kansas or Wichita or Kentucky or Louisiana or new Orleans or baton rouge or Shreveport or Maine or Orono or Johns Hopkins or Massachusetts or Boston or Harvard or Michigan or Detroit or Ann Arbor or East Lansing or Minnesota or Minneapolis or Rochester or Montana or Mississippi or Missouri or Missoula or Nebraska or Nevada or Las Vegas or New Hampshire or New Jersey or New Mexico or New York or North Carolina or North Dakota or Ohio or Cincinnati or Oklahoma or Oregon or Illinois or Chicago or Maryland or Pennsylvania or Philadelphia or South Carolina or South Dakota or Tennessee or | 512919  |

|     |                                                                                                                                                                                                                                                                                                                                                                                                                                                                                                                                                                                                                                              |         |
|-----|----------------------------------------------------------------------------------------------------------------------------------------------------------------------------------------------------------------------------------------------------------------------------------------------------------------------------------------------------------------------------------------------------------------------------------------------------------------------------------------------------------------------------------------------------------------------------------------------------------------------------------------------|---------|
|     | Nashville or Memphis or Texas or Houston or Utah or Vermont or Virginia or Rhode Island or Washington or Seattle or West Virginia or Wisconsin or Wyoming or Delaware or Mayo Clinic or AHRQ).ti,ab,kw.                                                                                                                                                                                                                                                                                                                                                                                                                                      |         |
| 119 | ((Birmingham or Montgomery) adj al) or Huntsville or anchorage or fairbanks or Phoenix or Tuscon or Flagstaff or Berkeley or Stanford or Vail or Denver or Farmington or New Haven or Hartford or Wilmington or Newark or Miami or ((Athens or Augusta) adj ga) or Boise or Urbana or Evanston or Lexington or Louisville or Bardstown or (Scarborough adj me) or Bethesda or Baltimore or Rockville or (Worcester adj ma) or Burlington or St Paul or Saint Paul or (Jackson adj ms) or (Columbia adj mo) or Bozeman or Omaha or Lincoln or Columbus or Cleveland or Portland or Hershey or providence or Richmond or Washington).ti,ab,kw. | 92457   |
| 120 | Dollar\$.ti,ab.                                                                                                                                                                                                                                                                                                                                                                                                                                                                                                                                                                                                                              | 20506   |
| 121 | (medicare or medicaid).ti,ab.                                                                                                                                                                                                                                                                                                                                                                                                                                                                                                                                                                                                                | 61209   |
| 122 | North America/                                                                                                                                                                                                                                                                                                                                                                                                                                                                                                                                                                                                                               | 20545   |
| 123 | or/107-122                                                                                                                                                                                                                                                                                                                                                                                                                                                                                                                                                                                                                                   | 2397111 |
| 124 | exp Europe/                                                                                                                                                                                                                                                                                                                                                                                                                                                                                                                                                                                                                                  | 1434994 |
| 125 | European Union/                                                                                                                                                                                                                                                                                                                                                                                                                                                                                                                                                                                                                              | 16351   |
| 126 | (Europe\$3 or EU5).ti,ab,bt,kf,jw.                                                                                                                                                                                                                                                                                                                                                                                                                                                                                                                                                                                                           | 859470  |
| 127 | exp France/                                                                                                                                                                                                                                                                                                                                                                                                                                                                                                                                                                                                                                  | 101999  |
| 128 | (France or french).ti,bt,ab,kw,jw.                                                                                                                                                                                                                                                                                                                                                                                                                                                                                                                                                                                                           | 142955  |
| 129 | exp Germany/                                                                                                                                                                                                                                                                                                                                                                                                                                                                                                                                                                                                                                 | 120308  |
| 130 | German\$1.ti,bt,ab,kf,jw.                                                                                                                                                                                                                                                                                                                                                                                                                                                                                                                                                                                                                    | 143978  |
| 131 | exp Italy/                                                                                                                                                                                                                                                                                                                                                                                                                                                                                                                                                                                                                                   | 97856   |
| 132 | (Italy or Italian\$).ti,bt,ab,kf,jw.                                                                                                                                                                                                                                                                                                                                                                                                                                                                                                                                                                                                         | 183823  |
| 133 | exp Spain/                                                                                                                                                                                                                                                                                                                                                                                                                                                                                                                                                                                                                                   | 78284   |

|     |                                                                                                                                                                                                                                                                                                                                                                                                                                                                                                                                                                                                                                                                                                                                                                         |         |
|-----|-------------------------------------------------------------------------------------------------------------------------------------------------------------------------------------------------------------------------------------------------------------------------------------------------------------------------------------------------------------------------------------------------------------------------------------------------------------------------------------------------------------------------------------------------------------------------------------------------------------------------------------------------------------------------------------------------------------------------------------------------------------------------|---------|
| 134 | (Spain or Spanish or Spaniards).ti,bt,ab,kw,jw.                                                                                                                                                                                                                                                                                                                                                                                                                                                                                                                                                                                                                                                                                                                         | 109307  |
| 135 | exp United Kingdom/                                                                                                                                                                                                                                                                                                                                                                                                                                                                                                                                                                                                                                                                                                                                                     | 368611  |
| 136 | (UK or U K).ti.                                                                                                                                                                                                                                                                                                                                                                                                                                                                                                                                                                                                                                                                                                                                                         | 30880   |
| 137 | (Britain\$ or (British\$ not "British Columbia") or United Kingdom\$ or (England\$ not "New England") or Northern Ireland\$ or Northern Irish\$ or Scotland\$ or Scottish\$ or ((Wales or "South Wales") not "New South Wales") or Welsh\$).ti,ab,kw,jw.                                                                                                                                                                                                                                                                                                                                                                                                                                                                                                                | 684812  |
| 138 | (English adj3 (Society or Association or patients)).ti,ab.                                                                                                                                                                                                                                                                                                                                                                                                                                                                                                                                                                                                                                                                                                              | 2532    |
| 139 | (English adj (population or hospital\$1 or citizen\$)).ti,ab.                                                                                                                                                                                                                                                                                                                                                                                                                                                                                                                                                                                                                                                                                                           | 713     |
| 140 | "National Institute for Health and Care Excellence".ti,ab.                                                                                                                                                                                                                                                                                                                                                                                                                                                                                                                                                                                                                                                                                                              | 2004    |
| 141 | (National Health Service\$ or nhs\$).ti,ab.                                                                                                                                                                                                                                                                                                                                                                                                                                                                                                                                                                                                                                                                                                                             | 43958   |
| 142 | ((((Albania\$ or Andorra\$ or Armenia\$ or Austria\$ or Azerbaijan\$ or Belarus\$ or Belgium or Belgian\$ or Bosnia\$) and Herzegovin\$) or Bulgaria\$ or Croatia\$ or Cyprus or Cyprian\$ or Czechia\$ or Denmark or Danish or Estonia\$ or Finland or Finnish or Georgia\$ or Greece or Greek\$ or Hungary or Hungarian\$ or Iceland\$ or Ireland or Irish or Kosovo\$ or Latvia\$ or Liechtenstein or Lithuania\$ or Luxembourg\$ or Malta or Moldova\$ or Monaco or Montenegro or Netherlands or Dutch\$ or North Macedonia\$ or Norway or Norwegian\$ or Poland or Polish or Portugal or Portuguese or Romania\$ or San Marino or Serbia\$ or Slovakia\$ or Slovenia\$ or Sweden or Swedish or Switzerland or Swiss or Turkey or Turkish or Ukrain\$).ti,ab,kf,jw. | 633755  |
| 143 | (euro or euros or EUR).ti,ab.                                                                                                                                                                                                                                                                                                                                                                                                                                                                                                                                                                                                                                                                                                                                           | 18177   |
| 144 | or/124-143                                                                                                                                                                                                                                                                                                                                                                                                                                                                                                                                                                                                                                                                                                                                                              | 3298564 |
| 145 | exp South America/                                                                                                                                                                                                                                                                                                                                                                                                                                                                                                                                                                                                                                                                                                                                                      | 165578  |
| 146 | exp Central America/                                                                                                                                                                                                                                                                                                                                                                                                                                                                                                                                                                                                                                                                                                                                                    | 15908   |
| 147 | Caribbean Region/ or West Indies/ or Dominican Republic/                                                                                                                                                                                                                                                                                                                                                                                                                                                                                                                                                                                                                                                                                                                | 5119    |
| 148 | Latin America/                                                                                                                                                                                                                                                                                                                                                                                                                                                                                                                                                                                                                                                                                                                                                          | 11334   |



|     |                                                                                                                                                                                                                                                                                                                                                                                                       |         |
|-----|-------------------------------------------------------------------------------------------------------------------------------------------------------------------------------------------------------------------------------------------------------------------------------------------------------------------------------------------------------------------------------------------------------|---------|
| 149 | (Latin? America\$ or Latinoamerica\$ or South America\$ or Central America\$ or Caribbean\$).ti,bt,ab,kw,jw.                                                                                                                                                                                                                                                                                          | 76482   |
| 150 | (Argentina or Argentinian\$ or Bolivia\$ or Brazil\$ or Brasil\$ or Chile or Chilean\$ or Colombia\$ or Ecuador or Ecuadorian\$ or Paraguay\$ or Peru or Peruvian\$ or Uruguay\$ or Venezuela\$ or Costa Rica\$ or El Salvador or Salvadorian\$ or Guatemala\$ or Guatemaltec\$ or Honduras\$ or Mexico or Mexican\$ or Nicaragua\$ or Panama\$ or Dominican Republic or Dominican\$).ti,bt,ab,kw,jw. | 410136  |
| 151 | (Buenos Aires or La Paz or Sucre or Rio de Janeiro or Sao Paulo or Santiago or Valparaiso or Concepcion or Bogota or Quito or Asuncion or Lima or Montevideo or Caracas or San Salvador or Tegucigalpa or Managua or Santo Domingo).ti,bt,ab.                                                                                                                                                         | 38618   |
| 152 | or/145-151                                                                                                                                                                                                                                                                                                                                                                                            | 505355  |
| 153 | (Global\$2 or worldwide or world wide).ti,ab,bt,kf.                                                                                                                                                                                                                                                                                                                                                   | 657621  |
| 154 | International.ti,bt.                                                                                                                                                                                                                                                                                                                                                                                  | 75585   |
| 155 | or/153-154                                                                                                                                                                                                                                                                                                                                                                                            | 726832  |
| 156 | 106 or 123 or 144 or 152 or 155                                                                                                                                                                                                                                                                                                                                                                       | 7189688 |
| 157 | 74 or 85                                                                                                                                                                                                                                                                                                                                                                                              | 5705803 |
| 158 | 156 and 157                                                                                                                                                                                                                                                                                                                                                                                           | 2177379 |
| 159 | 99 or 158                                                                                                                                                                                                                                                                                                                                                                                             | 2519970 |
| 160 | 10 and 35                                                                                                                                                                                                                                                                                                                                                                                             | 12353   |
| 161 | 159 and 160                                                                                                                                                                                                                                                                                                                                                                                           | 1975    |
| 162 | limit 161 to yr="2000 -Current"                                                                                                                                                                                                                                                                                                                                                                       | 1556    |
| 163 | limit 162 to English language                                                                                                                                                                                                                                                                                                                                                                         | 1463    |
| 164 | ((neonat\$ or newborn\$ or prenatal or antenatal or postnatal or maternal) adj3 screen\$).ti,ab.                                                                                                                                                                                                                                                                                                      | 20484   |
| 165 | (reactivat\$ or re-activat\$).ti,ab,kf.                                                                                                                                                                                                                                                                                                                                                               | 44290   |

|     |                                                                                                                                                                                                                                                                                                                                                                                                                                                                                                                                                                                                                                                                                                                                                                                                                                    |         |
|-----|------------------------------------------------------------------------------------------------------------------------------------------------------------------------------------------------------------------------------------------------------------------------------------------------------------------------------------------------------------------------------------------------------------------------------------------------------------------------------------------------------------------------------------------------------------------------------------------------------------------------------------------------------------------------------------------------------------------------------------------------------------------------------------------------------------------------------------|---------|
| 166 | Force of infection\$.ti,ab,kf.                                                                                                                                                                                                                                                                                                                                                                                                                                                                                                                                                                                                                                                                                                                                                                                                     | 531     |
| 167 | (Pregnancy loss\$ or miscarriage\$ or abortion\$ or fetal death\$).ti,ab,kf.                                                                                                                                                                                                                                                                                                                                                                                                                                                                                                                                                                                                                                                                                                                                                       | 87259   |
| 168 | ((targeted or universal or routine) adj2 screen\$).ti,ab.                                                                                                                                                                                                                                                                                                                                                                                                                                                                                                                                                                                                                                                                                                                                                                          | 18325   |
| 169 | (sequelae or long term effects).ti,ab,kf.                                                                                                                                                                                                                                                                                                                                                                                                                                                                                                                                                                                                                                                                                                                                                                                          | 95069   |
| 170 | ((emotional\$ or psycholog\$ or psychosocial\$ or social or psychometric or neuropsycholog\$ or neurodevelopment\$ or development\$ or neurocognit\$ or cognit\$ or mental or language or auditory or audiolog\$ or hearing) adj3 (outcome\$ or function\$ or performance or skills)).ti,ab.                                                                                                                                                                                                                                                                                                                                                                                                                                                                                                                                       | 276811  |
| 171 | (cognitive abilit\$ or cognitive disabilit\$ or cognitive delay\$ or mental development or developmental disabilit\$ or developmental abnormalit\$ or audiologic?? outcome\$ or hearing deficits or hearing impairment or hearing loss or hearing abilit\$ or phonologic?? outcome\$ or auditory perception or speech recognition or word recognition or speech discrimination or language production or language delay or speech perception or language perception or language development or (language adj2 processing) or speech Intelligibility or speech development or verbal ability or (child adj2 development) or emotional problems or peer problems or executive function\$ or working memory or cognitive flexibility or flexible thinking or psychological development or mental health or school performance).ti,ab. | 323738  |
| 172 | (Polymerase Chain Reaction/ or Real-Time Polymerase Chain Reaction/ or (Polymerase Chain Reaction or PCR or test\$ or screen\$).ti,ab,kf.) and (urin\$ or saliva\$ or oral swab\$ or blood spot\$).ti,ab.                                                                                                                                                                                                                                                                                                                                                                                                                                                                                                                                                                                                                          | 131399  |
| 173 | Alethia\$.ti,ab,kf.                                                                                                                                                                                                                                                                                                                                                                                                                                                                                                                                                                                                                                                                                                                                                                                                                | 4       |
| 174 | or/164-173                                                                                                                                                                                                                                                                                                                                                                                                                                                                                                                                                                                                                                                                                                                                                                                                                         | 920624  |
| 175 | 35 or 174                                                                                                                                                                                                                                                                                                                                                                                                                                                                                                                                                                                                                                                                                                                                                                                                                          | 4302503 |
| 176 | (Polymerase Chain Reaction/ or Real-Time Polymerase Chain Reaction/ or (Polymerase Chain Reaction or PCR or test\$ or screen\$).ti,ab,kf.) and (urin\$ or saliva\$ or oral swab\$ or blood spot\$).ti,ab.                                                                                                                                                                                                                                                                                                                                                                                                                                                                                                                                                                                                                          | 131399  |

|     |                                                                                                  |         |
|-----|--------------------------------------------------------------------------------------------------|---------|
| 177 | Alethia\$.ti,ab,kf.                                                                              | 4       |
| 178 | ((neonat\$ or newborn\$ or prenatal or antenatal or postnatal or maternal) adj3 screen\$).ti,ab. | 20484   |
| 179 | ((targeted or universal or routine) adj2 screen\$).ti,ab.                                        | 18325   |
| 180 | or/176-179                                                                                       | 165409  |
| 181 | 58 or 61 or 72 or 85 or 180                                                                      | 5989412 |
| 182 | 181 not (exp animals/ not humans.sh.)                                                            | 5782405 |
| 183 | 156 and 182                                                                                      | 2194090 |
| 184 | 99 or 183                                                                                        | 2536297 |
| 185 | 10 and 175                                                                                       | 15004   |
| 186 | 184 and 185                                                                                      | 2244    |
| 187 | limit 186 to yr="2000 -Current"                                                                  | 1762    |
| 188 | limit 187 to English language                                                                    | 1654    |

15

16

17 **Supplemental Table 5. Widened search strategy for Embase**

|                             |                                                                                                                                                                                                                                                                                                                                                                                                                                                                                                                                                                                                                                                                                                                                                                                                                                                                                                                                                                                                                                                                                                                                                                                                                                                                                                                                                                                                                                                                                                                                                                                                            |
|-----------------------------|------------------------------------------------------------------------------------------------------------------------------------------------------------------------------------------------------------------------------------------------------------------------------------------------------------------------------------------------------------------------------------------------------------------------------------------------------------------------------------------------------------------------------------------------------------------------------------------------------------------------------------------------------------------------------------------------------------------------------------------------------------------------------------------------------------------------------------------------------------------------------------------------------------------------------------------------------------------------------------------------------------------------------------------------------------------------------------------------------------------------------------------------------------------------------------------------------------------------------------------------------------------------------------------------------------------------------------------------------------------------------------------------------------------------------------------------------------------------------------------------------------------------------------------------------------------------------------------------------------|
|                             | Embase                                                                                                                                                                                                                                                                                                                                                                                                                                                                                                                                                                                                                                                                                                                                                                                                                                                                                                                                                                                                                                                                                                                                                                                                                                                                                                                                                                                                                                                                                                                                                                                                     |
| <b>Search Platform:</b>     | Ovid                                                                                                                                                                                                                                                                                                                                                                                                                                                                                                                                                                                                                                                                                                                                                                                                                                                                                                                                                                                                                                                                                                                                                                                                                                                                                                                                                                                                                                                                                                                                                                                                       |
| <b>Date of Search:</b>      | December 14, 2020<br><br>[Last Database Update: December 11, 2020]                                                                                                                                                                                                                                                                                                                                                                                                                                                                                                                                                                                                                                                                                                                                                                                                                                                                                                                                                                                                                                                                                                                                                                                                                                                                                                                                                                                                                                                                                                                                         |
| <b>Date Range Searched:</b> | 1974 to current, restricted to 2000 to current                                                                                                                                                                                                                                                                                                                                                                                                                                                                                                                                                                                                                                                                                                                                                                                                                                                                                                                                                                                                                                                                                                                                                                                                                                                                                                                                                                                                                                                                                                                                                             |
| <b>Search Filters:</b>      | <p>In development of the search strategies the following search filters were used and partly modified:</p> <p>Systematic Reviews</p> <ul style="list-style-type: none"> <li>- SIGN Search Strategy Systematic Reviews, OVID format. Scottish Intermediate Guidelines Network (SIGN), Filter Systematic Reviews. Available from: <a href="http://sign.ac.uk/search-filters.html">http://sign.ac.uk/search-filters.html</a> [Word document last modified April 25, 2017; cited May 13, 2020] [slightly modified, supplemented with additional search terms]</li> </ul> <p>Country restrictions:</p> <ul style="list-style-type: none"> <li>- Campbell, Sandy. Filter to Retrieve Studies Related to Canada, Canadian Provinces, and the One Hundred Largest Canadian Centres from the OVID MEDLINE Database. John W. Scott Health Sciences Library, University of Alberta. Rev. March 06, 2020. Available from: <a href="http://guides.library.ualberta.ca/health-sciences-search-filters/geographic-filters">http://guides.library.ualberta.ca/health-sciences-search-filters/geographic-filters</a> [used, partly modified/adapted]</li> <li>- UAB Libraries. PubMed via LHL: Hedges: Search filter United States (work in progress!) [Internet], Cited: October 19, 2020. Available from: <a href="https://guides.library.uab.edu/pubmed/hedges">https://guides.library.uab.edu/pubmed/hedges</a> [used, partly modified/adapted]</li> <li>- Ayiku L, Levay P, Hudson T, Craven J, Barrett E, Finnegan A and Adams R. The MEDLINE UK filter: development and validation of a geographic search</li> </ul> |

|   | filter to retrieve research about the UK from OVID MEDLINE. Health Information and Libraries Journal, 2017 34 (3): 200-216. [consulted, partly used/adapted]                                                                                                                                              |       |
|---|-----------------------------------------------------------------------------------------------------------------------------------------------------------------------------------------------------------------------------------------------------------------------------------------------------------|-------|
| # | Search Terms                                                                                                                                                                                                                                                                                              | Hits  |
| 1 | *Cytomegalovirus/                                                                                                                                                                                                                                                                                         | 12403 |
| 2 | exp *Human Cytomegalovirus/                                                                                                                                                                                                                                                                               | 4129  |
| 3 | exp *Cytomegalovirus Infection/                                                                                                                                                                                                                                                                           | 15669 |
| 4 | *Cytomegalovirus antibody/                                                                                                                                                                                                                                                                                | 595   |
| 5 | *congenital cytomegalovirus infection/                                                                                                                                                                                                                                                                    | 82    |
| 6 | Cytomegalovirus/ and (Cytomegalovir\$ or cmv or hcmv or ccmv or human herpesvirus 5 or human herpes virus 5 or human herpesvirus type 5 or human herpes virus type 5 or human betaherpesvirus 5 or human beta-herpesvirus 5 or HHV 5 or HHV5 or salivary gland virus\$ or cytomegalic).ab.                | 24047 |
| 7 | exp Human Cytomegalovirus/ and (Cytomegalovir\$ or cmv or hcmv or ccmv or human herpesvirus 5 or human herpes virus 5 or human herpesvirus type 5 or human herpes virus type 5 or human betaherpesvirus 5 or human beta-herpesvirus 5 or HHV 5 or HHV5 or salivary gland virus\$ or cytomegalic).ab.      | 6201  |
| 8 | exp Cytomegalovirus Infections/ and (Cytomegalovir\$ or cmv or hcmv or ccmv or human herpesvirus 5 or human herpes virus 5 or human herpesvirus type 5 or human herpes virus type 5 or human betaherpesvirus 5 or human beta-herpesvirus 5 or HHV 5 or HHV5 or salivary gland virus\$ or cytomegalic).ab. | 22497 |
| 9 | Cytomegalovirus antibody/ and (Cytomegalovir\$ or cmv or hcmv or ccmv or human herpesvirus 5 or human herpes virus 5 or human herpesvirus type 5 or human herpes virus type 5 or human betaherpesvirus 5 or human beta-herpesvirus 5 or HHV 5 or HHV5 or salivary gland virus\$ or cytomegalic).ab.       | 1500  |

|    |                                                                                                                                                                                                                                                                                                                        |         |
|----|------------------------------------------------------------------------------------------------------------------------------------------------------------------------------------------------------------------------------------------------------------------------------------------------------------------------|---------|
| 10 | congenital cytomegalovirus infection/ and (Cytomegalovir\$ or cmv or hcmv or ccmv or human herpesvirus 5 or human herpes virus 5 or human herpesvirus type 5 or human herpes virus type 5 or human betaherpesvirus 5 or human beta-herpesvirus 5 or HHV 5 or HHV5 or salivary gland virus\$ or cytomegalic).ab.        | 77      |
| 11 | (Cytomegalovir\$ or cmv or hcmv or ccmv or human herpesvirus 5 or human herpes virus 5 or human herpesvirus type 5 or human herpes virus type 5 or human betaherpesvirus 5 or human beta-herpesvirus 5 or HHV 5 or HHV5 or salivary gland virus\$).ti.                                                                 | 32943   |
| 12 | Cytomegalovir\$.ab. /freq=2                                                                                                                                                                                                                                                                                            | 5840    |
| 13 | Cytomegalovir\$.af. and (cmv or hcmv or ccmv or hhv 5 or hhv5).ab. /freq=2                                                                                                                                                                                                                                             | 28410   |
| 14 | (Cytomegalovir\$ or cmv or hcmv or ccmv or human herpesvirus 5 or human herpes virus 5 or human herpesvirus type 5 or human herpes virus type 5 or human betaherpesvirus 5 or human beta-herpesvirus 5 or HHV 5 or HHV5 or salivary gland virus\$).ab. and (article-in-press or conference abstract or in-process).st. | 19525   |
| 15 | or/1-14                                                                                                                                                                                                                                                                                                                | 64306   |
| 16 | Cytomegalovirus infection/ep                                                                                                                                                                                                                                                                                           | 1263    |
| 17 | congenital cytomegalovirus infection/ep                                                                                                                                                                                                                                                                                | 13      |
| 18 | Seroepidemiology/                                                                                                                                                                                                                                                                                                      | 4292    |
| 19 | Congenital infection/ep                                                                                                                                                                                                                                                                                                | 195     |
| 20 | Congenital disorder/ep                                                                                                                                                                                                                                                                                                 | 577     |
| 21 | Intrauterine infection/ep                                                                                                                                                                                                                                                                                              | 168     |
| 22 | Seroprevalence/                                                                                                                                                                                                                                                                                                        | 22659   |
| 23 | Prevalence/ or Incidence/                                                                                                                                                                                                                                                                                              | 1121561 |

|    |                                                                                                                                                                                                                                                    |         |
|----|----------------------------------------------------------------------------------------------------------------------------------------------------------------------------------------------------------------------------------------------------|---------|
| 24 | mortality/ or childhood mortality/ or embryo mortality/ or fetus mortality/ or hospital mortality/ or infant mortality/ or mortality rate/ or perinatal mortality/ or premature mortality/ or prenatal mortality/ or standardized mortality ratio/ | 899892  |
| 25 | Cytomegalovirus seropositivity/                                                                                                                                                                                                                    | 1       |
| 26 | Infection rate/                                                                                                                                                                                                                                    | 31994   |
| 27 | Newborn Screening/ or Prenatal Screening/                                                                                                                                                                                                          | 27988   |
| 28 | dried blood spot testing/                                                                                                                                                                                                                          | 4132    |
| 29 | Virus Shedding/                                                                                                                                                                                                                                    | 7138    |
| 30 | (prevalence\$ or prevalent or incidence\$ or incident or mortalit\$ or epidemiolog\$ or morbidity or seroepidemiolog\$ or seroprevalen\$ or seroinciden\$ or serosurvey\$ or sero survey or serosurveillance or sero surveillance).ti,ab,kw.       | 3610756 |
| 31 | (cases adj4 (birth\$ or year\$ or positive or symptomatic or asymptomatic)).ti,ab.                                                                                                                                                                 | 149280  |
| 32 | (CMV cases or HCMV cases or CCMV cases).ti,ab.                                                                                                                                                                                                     | 86      |
| 33 | ((transmission or diagnosis) adj4 rate\$).ti,ab.                                                                                                                                                                                                   | 24869   |
| 34 | (transmission adj3 risk).mp.                                                                                                                                                                                                                       | 16642   |
| 35 | (infection rate\$ or disease rate\$).ti,ab,kw.                                                                                                                                                                                                     | 36351   |
| 36 | Frequency.ti,ab.                                                                                                                                                                                                                                   | 1090458 |
| 37 | ((neonat\$ or newborn\$ or prenatal or maternal) adj2 screening).ti,ab.                                                                                                                                                                            | 23777   |
| 38 | Shedding.ti,ab,kw.                                                                                                                                                                                                                                 | 31222   |
| 39 | or/16-38                                                                                                                                                                                                                                           | 5082459 |
| 40 | cohort analysis/                                                                                                                                                                                                                                   | 644864  |
| 41 | exp longitudinal study/                                                                                                                                                                                                                            | 148767  |
| 42 | observational study/                                                                                                                                                                                                                               | 215825  |

|    |                                                                                                                                                                                                                                                                                                                                                                                                                                                                                                                               |         |
|----|-------------------------------------------------------------------------------------------------------------------------------------------------------------------------------------------------------------------------------------------------------------------------------------------------------------------------------------------------------------------------------------------------------------------------------------------------------------------------------------------------------------------------------|---------|
| 43 | retrospective study/                                                                                                                                                                                                                                                                                                                                                                                                                                                                                                          | 1001216 |
| 44 | exp "medical record review"/                                                                                                                                                                                                                                                                                                                                                                                                                                                                                                  | 132556  |
| 45 | prospective study/                                                                                                                                                                                                                                                                                                                                                                                                                                                                                                            | 646852  |
| 46 | cross-sectional study/                                                                                                                                                                                                                                                                                                                                                                                                                                                                                                        | 383354  |
| 47 | exp case control study/                                                                                                                                                                                                                                                                                                                                                                                                                                                                                                       | 183174  |
| 48 | Factual database/                                                                                                                                                                                                                                                                                                                                                                                                                                                                                                             | 24898   |
| 49 | Major clinical study/                                                                                                                                                                                                                                                                                                                                                                                                                                                                                                         | 3956032 |
| 50 | Controlled study/                                                                                                                                                                                                                                                                                                                                                                                                                                                                                                             | 7834149 |
| 51 | (Long-term or observational or cohort? or longitudinal or prospective or retrospective or comparative or case-control or cross-sectional or followup or survey\$.ti.                                                                                                                                                                                                                                                                                                                                                          | 1215504 |
| 52 | (real-world or real life).ti.                                                                                                                                                                                                                                                                                                                                                                                                                                                                                                 | 31742   |
| 53 | (cohort analys\$ or cohort stud\$ or longitudinal stud\$ or chart review\$ or medical record review\$ or observational stud\$ or retrospective analys\$ or retrospective chart review? or retrospective clinical stud\$ or retrospective cohort\$ or retrospective stud\$ or retrospective database\$ or retrospective observational\$ or cross-sectional stud\$ or cross-sectional setting\$ or case control stud\$ or case control setting or nested case control stud\$ or matched case-control stud\$ or case series).kw. | 49207   |
| 54 | (cohort adj (study or studies or analy\$)).ti,ab.                                                                                                                                                                                                                                                                                                                                                                                                                                                                             | 332858  |
| 55 | (cohort\$ adj2 (birth\$ or newborn\$)).ti,ab,kw.                                                                                                                                                                                                                                                                                                                                                                                                                                                                              | 24174   |
| 56 | ((longitudinal or cross sectional or case-control or pragmatic or large scale) adj (study or studies)).ti,ab.                                                                                                                                                                                                                                                                                                                                                                                                                 | 477968  |
| 57 | ((observational or retrospective or prospective) adj3 (study or studies or cohort\$1 or data\$ or analys#s)).ti,ab.                                                                                                                                                                                                                                                                                                                                                                                                           | 1389623 |



|    |                                                                                                                                                                         |          |
|----|-------------------------------------------------------------------------------------------------------------------------------------------------------------------------|----------|
| 58 | ((real world or real life) adj3 (data\$ or setting or cohort\$ or stud\$ or experience\$ or result\$)).ti,ab.                                                           | 46654    |
| 59 | (data adj (report\$ or data system\$1)).ti,ab.                                                                                                                          | 16238    |
| 60 | Electronic Medical Record/                                                                                                                                              | 57789    |
| 61 | (chart review or medical record review or (review adj5 patient records) or case series or consecutive patients or nonconsecutive patients).ti,ab,kw.                    | 445053   |
| 62 | ((Population-based or nationwide or community based or national or hospital based) adj3 (stud\$3 or cohort\$ or data\$ or register\$ or database\$ or sample\$)).ti,ab. | 324732   |
| 63 | (Database analys#s or database stud\$ or claims data\$).ti,ab.                                                                                                          | 34877    |
| 64 | (single center or single centre or single institution or hospital\$).ti.                                                                                                | 457582   |
| 65 | or/40-64                                                                                                                                                                | 12016316 |
| 66 | Disease registry/                                                                                                                                                       | 15355    |
| 67 | register/                                                                                                                                                               | 114821   |
| 68 | (registries or registry or disease regist\$3 or register\$1 or national regist\$).ti,ab,kw.                                                                             | 316380   |
| 69 | or/66-68                                                                                                                                                                | 335238   |
| 70 | exp Health survey/                                                                                                                                                      | 227776   |
| 71 | exp disease surveillance/                                                                                                                                               | 30986    |
| 72 | Population research/                                                                                                                                                    | 110899   |
| 73 | Newborn screening/                                                                                                                                                      | 19532    |
| 74 | dried blood spot testing/                                                                                                                                               | 4132     |
| 75 | (health survey\$1 or survey\$1 or surveillance).ti,ab,hw.                                                                                                               | 1708256  |
| 76 | Mass screening/ or Screening/                                                                                                                                           | 234734   |
| 77 | Newborn screening/                                                                                                                                                      | 19532    |

|    |                                                                                                                                                                                                                                                                                                                                                                                          |          |
|----|------------------------------------------------------------------------------------------------------------------------------------------------------------------------------------------------------------------------------------------------------------------------------------------------------------------------------------------------------------------------------------------|----------|
| 78 | Prenatal screening/                                                                                                                                                                                                                                                                                                                                                                      | 8700     |
| 79 | ((neonat\$ or newborn\$ or prenatal or maternal) adj3 screen\$).ti,ab.                                                                                                                                                                                                                                                                                                                   | 27260    |
| 80 | ((CMV or HCMV or CCMV or cytomegalovirus) adj3 screen\$).ti,ab.                                                                                                                                                                                                                                                                                                                          | 923      |
| 81 | Seroepidemiology/                                                                                                                                                                                                                                                                                                                                                                        | 4292     |
| 82 | or/70-81                                                                                                                                                                                                                                                                                                                                                                                 | 2071381  |
| 83 | 65 or 69 or 82                                                                                                                                                                                                                                                                                                                                                                           | 13301913 |
| 84 | (exp Animal/ or animal experiment/ or nonhuman/) not (exp Human/ or Human experiment/)                                                                                                                                                                                                                                                                                                   | 6611415  |
| 85 | animal experiment/ and (mouse or mice or murine or rat or rats or rabbit or rabbits or cat or cats or dog or dogs or swine or porcine or pig or pigs or piglet or piglets or lamb or lambs or cattle or bovine or monkey or monkeys).ti.                                                                                                                                                 | 1093694  |
| 86 | or/84-85                                                                                                                                                                                                                                                                                                                                                                                 | 6663980  |
| 87 | 83 not 86                                                                                                                                                                                                                                                                                                                                                                                | 10542195 |
| 88 | exp Mathematical model/                                                                                                                                                                                                                                                                                                                                                                  | 413479   |
| 89 | Simulation/                                                                                                                                                                                                                                                                                                                                                                              | 186072   |
| 90 | model\$.kw.                                                                                                                                                                                                                                                                                                                                                                              | 285315   |
| 91 | (model or models or modelling or modeling).ti. not (((mouse or mice or murine or rat or rats or rabbit or rabbits or cat or cats or dog or dogs or swine or porcine or pig or pigs or piglet or piglets or lamb or lambs or cattle or bovine or monkey or monkeys or rhesus or macaque\$ or nonhuman or "in vitro" or animal\$ or organism\$) adj3 model\$).ti,kw. or exp Animal Model/) | 468758   |
| 92 | ((mathematic\$ or statistic\$ or transmission\$ or epidemiolog\$ or epidemic\$ or vaccination\$ or immuni\$ or theoretical\$) adj3 model\$).ti,ab,kw.                                                                                                                                                                                                                                    | 152547   |
| 93 | ((linear or nonlinear or static\$ or dynamic\$ or explicit or implicit or discrete\$ or continuous\$ or deterministic\$ or probabilistic\$ or stochastic\$ or deductive or inductive or floating or strateg\$ or                                                                                                                                                                         | 261987   |

|     |                                                                                                                                                                                                                                                   |          |
|-----|---------------------------------------------------------------------------------------------------------------------------------------------------------------------------------------------------------------------------------------------------|----------|
|     | nonstrateg\$ or conceptual\$ or quantitative\$ or qualitative\$ or individual\$ or structured or catalytic) adj3 model\$).ti,ab,kw.                                                                                                               |          |
| 94  | or/88-93                                                                                                                                                                                                                                          | 1331021  |
| 95  | 94 not ((exp Animal/ or animal experiment/ or nonhuman/) not (exp Human/ or Human experiment/))                                                                                                                                                   | 1104765  |
| 96  | 95 not (animal experiment/ and (mouse or mice or murine or rat or rats or rabbit or rabbits or cat or cats or dog or dogs or swine or porcine or pig or pigs or piglet or piglets or lamb or lambs or cattle or bovine or monkey or monkeys).ti.) | 1101397  |
| 97  | 87 or 96                                                                                                                                                                                                                                          | 11175572 |
| 98  | Systematic Review/                                                                                                                                                                                                                                | 273959   |
| 99  | exp Meta Analysis/                                                                                                                                                                                                                                | 203612   |
| 100 | biomedical technology assessment/                                                                                                                                                                                                                 | 14745    |
| 101 | ((meta adj analys\$) or metaanalys\$).tw.                                                                                                                                                                                                         | 246352   |
| 102 | (systematic adj2 (review\$1 or overview\$1)).tw.                                                                                                                                                                                                  | 246106   |
| 103 | (cochrane or embase or psychlit or psyclit or psychinfo or psycinfo or cinahl or cinhal or science citation index or bids or cancerlit or biosis or lilacs or web of science or scopus).ab.                                                       | 219883   |
| 104 | (reference lists or bibliograph\$ or hand search\$ or manual search\$ or relevant journals).ab.                                                                                                                                                   | 53874    |
| 105 | (selection criteria or eligibility criteria or data extraction).ab. and review.pt.                                                                                                                                                                | 34580    |
| 106 | ((systematic\$ or methodologic or quantitative or integrative or collaborative) adj5 (review or overview)) or technology assessment or bibliographic study).ti.                                                                                   | 178339   |
| 107 | or/98-106                                                                                                                                                                                                                                         | 567984   |
| 108 | (letter or editorial).pt.                                                                                                                                                                                                                         | 1832830  |
| 109 | (exp Animal/ or animal experiment/ or nonhuman/) not (exp Human/ or Human experiment/)                                                                                                                                                            | 6611415  |

|     |                                                                                                                                                                                                                                                                                                          |         |
|-----|----------------------------------------------------------------------------------------------------------------------------------------------------------------------------------------------------------------------------------------------------------------------------------------------------------|---------|
| 110 | animal experiment/ and (mouse or mice or murine or rat or rats or rabbit or rabbits or cat or cats or dog or dogs or swine or porcine or pig or pigs or piglet or piglets or lamb or lambs or cattle or bovine or monkey or monkeys).ti.                                                                 | 1093694 |
| 111 | or/108-110                                                                                                                                                                                                                                                                                               | 8430366 |
| 112 | 107 not 111                                                                                                                                                                                                                                                                                              | 545967  |
| 113 | exp Australia/ or Australian/                                                                                                                                                                                                                                                                            | 178801  |
| 114 | Australia\$.ti,ab,kw,jw.                                                                                                                                                                                                                                                                                 | 306040  |
| 115 | exp Japan/                                                                                                                                                                                                                                                                                               | 174135  |
| 116 | "japanese (people)"/ or "Japanese (people)"/                                                                                                                                                                                                                                                             | 29902   |
| 117 | Japan\$.ti,ab,kw,jw.                                                                                                                                                                                                                                                                                     | 668925  |
| 118 | Israel/ or Israeli/                                                                                                                                                                                                                                                                                      | 32304   |
| 119 | Israel\$.ti,ab,kw,jw.                                                                                                                                                                                                                                                                                    | 49037   |
| 120 | or/113-119                                                                                                                                                                                                                                                                                               | 1101760 |
| 121 | exp Canada/                                                                                                                                                                                                                                                                                              | 186242  |
| 122 | Canada.ti,ab,kw.                                                                                                                                                                                                                                                                                         | 116235  |
| 123 | Canadian\$.ti,ab,jw.                                                                                                                                                                                                                                                                                     | 242240  |
| 124 | (CADTH or pCODR or INESSS).ti,ab.                                                                                                                                                                                                                                                                        | 438     |
| 125 | (british columbia or alberta\$ or saskatchewan or manitoba\$ or ontario or quebec or new brunswick or nouveau brunswick or nova scotia or nouvelle ecosse or prince edward island or newfoundland or labrador or nunavut or nwt or northwest territories or yukon or nunavik or inuvialuit).ti,ab,kw,jw. | 97346   |
| 126 | (Abbotsford or Airdrie or Ajax or Aurora or Barrie or Belleville or Blainville or Brampton or Brantford or Brossard or Burlington or Burnaby or Caledon or Calgary or Cape Breton or Chatham Kent or Chilliwack or Clarington or Coquitlam or Drummondville or Edmonton or Fredericton or                | 175870  |

|     |                                                                                                                                                                                                                                                                                                                                                                                                                                                                                                                                                                                                                                                                                                                                                                                                                                                                                                                                                                                                                                                                                                                                                                                                                                       |         |
|-----|---------------------------------------------------------------------------------------------------------------------------------------------------------------------------------------------------------------------------------------------------------------------------------------------------------------------------------------------------------------------------------------------------------------------------------------------------------------------------------------------------------------------------------------------------------------------------------------------------------------------------------------------------------------------------------------------------------------------------------------------------------------------------------------------------------------------------------------------------------------------------------------------------------------------------------------------------------------------------------------------------------------------------------------------------------------------------------------------------------------------------------------------------------------------------------------------------------------------------------------|---------|
|     | Fort McMurray or Gatineau or Granby or Grande Prairie or Sudbury or Guelph or Halton Hills or Iqaluit or Inuvik or Kamloops or Kawartha Lakes or Kelowna or Kingston or Kitchener or Langley or Laval or Lethbridge or Levis or Longueuil or Maple Ridge or Markham or Medicine Hat or Milton or Mirabel or Mississauga or Moncton or Montreal or Nanaimo or New Westminster or Newmarket or Niagara Falls or Norfolk County or North Bay or North Vancouver or North Vancouver or Oakville or Oshawa or Ottawa or Peterborough or Pickering or Port Coquitlam or Prince George or Quebec City or Red Deer or Regina or Repentigny or Richmond or Richmond Hill or Saanich or Saguenay or Saint John or Saint-Hyacinthe or Saint-Jean-sur-Richelieu or Saint-Jerome or Sarnia or Saskatoon or Sault Ste Marie or Sherbrooke or St Albert or St Catharines or St John's or Strathcona County or Surrey or Terrebonne or Thunder Bay or Toronto or Trois-Rivieres or Vancouver or Vaughan or ((Cambridge or (Halifax or Hamilton or London or Victoria or Waterloo or Welland or Whitby or Windsor)) not (UK or Britain or United Kingdom or England or Australia)) or Whitehorse or Winnipeg or Wood Buffalo or Yellowknife).ti,ab,kw. |         |
| 127 | exp United States/                                                                                                                                                                                                                                                                                                                                                                                                                                                                                                                                                                                                                                                                                                                                                                                                                                                                                                                                                                                                                                                                                                                                                                                                                    | 1239022 |
| 128 | (united states or usa or us national or us census or us state\$ or US cohort\$ or US population or US adult\$ or US children).ti,ab,kw.                                                                                                                                                                                                                                                                                                                                                                                                                                                                                                                                                                                                                                                                                                                                                                                                                                                                                                                                                                                                                                                                                               | 553121  |
| 129 | (US or (U adj S)).ti.                                                                                                                                                                                                                                                                                                                                                                                                                                                                                                                                                                                                                                                                                                                                                                                                                                                                                                                                                                                                                                                                                                                                                                                                                 | 86245   |
| 130 | (America\$ not (Central America\$ or South America\$ or Latin America\$)).ti.                                                                                                                                                                                                                                                                                                                                                                                                                                                                                                                                                                                                                                                                                                                                                                                                                                                                                                                                                                                                                                                                                                                                                         | 126225  |
| 131 | ((midatlantic or mid-atlantic or middle-atlantic or Midwest\$3 or northeast\$3 or northwest\$3 or southeast\$3 or southern or southwest\$3) adj (state\$1 or region\$ or us or usa)).ti,ab,kw.                                                                                                                                                                                                                                                                                                                                                                                                                                                                                                                                                                                                                                                                                                                                                                                                                                                                                                                                                                                                                                        | 19980   |
| 132 | (Appalachia\$ or great lakes or great plains or heartland or new England or pacific northwest or deep south or black belt or rust belt or district of Columbia or Washington DC or Alabama or Alaska or Arizona or Arkansas or little rock or California or san Francisco or San Diego or Los Angeles or Colorado or Connecticut or Florida or Hawaii or Honolulu or Idaho or Gainesville or Jacksonville or Tampa or Tallahassee or Georgia or Atlanta or Illinois or Chicago or Indiana or Indianapolis or West Lafayette or iowa or Kansas or Wichita or Kentucky or Louisiana or new Orleans or baton rouge or Shreveport or Maine or Orono or Johns Hopkins or Massachusetts or                                                                                                                                                                                                                                                                                                                                                                                                                                                                                                                                                  | 690765  |

|     |                                                                                                                                                                                                                                                                                                                                                                                                                                                                                                                                                                                                                                                                         |         |
|-----|-------------------------------------------------------------------------------------------------------------------------------------------------------------------------------------------------------------------------------------------------------------------------------------------------------------------------------------------------------------------------------------------------------------------------------------------------------------------------------------------------------------------------------------------------------------------------------------------------------------------------------------------------------------------------|---------|
|     | Boston or Harvard or Michigan or Detroit or Ann Arbor or East Lansing or Minnesota or Minneapolis or Rochester or Montana or Mississippi or Missouri or Missoula or Nebraska or Nevada or Las Vegas or New Hampshire or New Jersey or New Mexico or New York or North Carolina or North Dakota or Ohio or Cincinnati or Oklahoma or Oregon or Illinois or Chicago or Maryland or Pennsylvania or Philadelphia or South Carolina or South Dakota or Tennessee or Nashville or Memphis or Texas or Houston or Utah or Vermont or Virginia or Rhode Island or Washington or Seattle or West Virginia or Wisconsin or Wyoming or Delaware or Mayo Clinic or AHRQ).ti,ab,kw. |         |
| 133 | ((Birmingham or Montgomery) adj al) or Huntsville or anchorage or fairbanks or Phoenix or Tuscon or Flagstaff or Berkeley or Stanford or Vail or Denver or Farmington or New Haven or Hartford or Wilmington or Newark or Miami or ((Athens or Augusta) adj ga) or Boise or Urbana or Evanston or Lexington or Louisville or Bardstown or (Scarborough adj me) or Bethesda or Baltimore or Rockville or (Worcester adj ma) or Burlington or St Paul or Saint Paul or (Jackson adj ms) or (Columbia adj mo) or Bozeman or Omaha or Lincoln or Columbus or Cleveland or Portland or Hershey or providence or Richmond or Washington).ti,ab,kw.                            | 122899  |
| 134 | Dollar\$.ti,ab.                                                                                                                                                                                                                                                                                                                                                                                                                                                                                                                                                                                                                                                         | 23472   |
| 135 | (medicare or medicaid).ti,ab.                                                                                                                                                                                                                                                                                                                                                                                                                                                                                                                                                                                                                                           | 85900   |
| 136 | North America/                                                                                                                                                                                                                                                                                                                                                                                                                                                                                                                                                                                                                                                          | 35750   |
| 137 | North America\$.ti,ab,kw.                                                                                                                                                                                                                                                                                                                                                                                                                                                                                                                                                                                                                                               | 73994   |
| 138 | exp North American/                                                                                                                                                                                                                                                                                                                                                                                                                                                                                                                                                                                                                                                     | 168144  |
| 139 | or/121-138                                                                                                                                                                                                                                                                                                                                                                                                                                                                                                                                                                                                                                                              | 2780357 |
| 140 | exp Europe/                                                                                                                                                                                                                                                                                                                                                                                                                                                                                                                                                                                                                                                             | 1597527 |
| 141 | exp European/ or exp EU Citizen/                                                                                                                                                                                                                                                                                                                                                                                                                                                                                                                                                                                                                                        | 181825  |
| 142 | (Europe\$3 or EU5).ti,ab,kw,jw.                                                                                                                                                                                                                                                                                                                                                                                                                                                                                                                                                                                                                                         | 1411562 |
| 143 | exp France/ or Frenchman/                                                                                                                                                                                                                                                                                                                                                                                                                                                                                                                                                                                                                                               | 124269  |

|     |                                                                                                                                                                                                                                                                                                                                                                                                                                                                                                                                                                                                                                                                                       |         |
|-----|---------------------------------------------------------------------------------------------------------------------------------------------------------------------------------------------------------------------------------------------------------------------------------------------------------------------------------------------------------------------------------------------------------------------------------------------------------------------------------------------------------------------------------------------------------------------------------------------------------------------------------------------------------------------------------------|---------|
| 144 | France.ti,ab,kw.                                                                                                                                                                                                                                                                                                                                                                                                                                                                                                                                                                                                                                                                      | 95784   |
| 145 | french.ti,ab,jw.                                                                                                                                                                                                                                                                                                                                                                                                                                                                                                                                                                                                                                                                      | 95290   |
| 146 | exp Germany/ or "german (citizen)"/                                                                                                                                                                                                                                                                                                                                                                                                                                                                                                                                                                                                                                                   | 188816  |
| 147 | German\$1.ti,ab,kw,jw.                                                                                                                                                                                                                                                                                                                                                                                                                                                                                                                                                                                                                                                                | 250159  |
| 148 | exp Italy/ or "italian (citizen)"/                                                                                                                                                                                                                                                                                                                                                                                                                                                                                                                                                                                                                                                    | 119522  |
| 149 | (Italy or Italian\$).ti,ab,kw,jw.                                                                                                                                                                                                                                                                                                                                                                                                                                                                                                                                                                                                                                                     | 235845  |
| 150 | exp Spain/ or Spaniard/                                                                                                                                                                                                                                                                                                                                                                                                                                                                                                                                                                                                                                                               | 100619  |
| 151 | (Spain or Spanish or Spaniard\$).ti,bt,ab,kw,jw.                                                                                                                                                                                                                                                                                                                                                                                                                                                                                                                                                                                                                                      | 140461  |
| 152 | exp United Kingdom/ or exp British Citizen/                                                                                                                                                                                                                                                                                                                                                                                                                                                                                                                                                                                                                                           | 425149  |
| 153 | (UK or U K).ti.                                                                                                                                                                                                                                                                                                                                                                                                                                                                                                                                                                                                                                                                       | 45801   |
| 154 | (britain\$ or (british\$ not "british columbia") or united kingdom\$ or (england\$ not "new england") or northern ireland\$ or northern irish\$ or scotland\$ or scottish\$ or ((wales or "south wales") not "new south wales") or welsh\$).ti,ab,kw,jw.                                                                                                                                                                                                                                                                                                                                                                                                                              | 778592  |
| 155 | (English adj3 (Society or Association or patients)).ti,ab.                                                                                                                                                                                                                                                                                                                                                                                                                                                                                                                                                                                                                            | 3269    |
| 156 | (English adj (population or hospital\$1 or citizen\$)).ti,ab.                                                                                                                                                                                                                                                                                                                                                                                                                                                                                                                                                                                                                         | 937     |
| 157 | "National Institute for Health and Care Excellence".ti,ab.                                                                                                                                                                                                                                                                                                                                                                                                                                                                                                                                                                                                                            | 3497    |
| 158 | ((Albania\$ or Andorra\$ or Armenia\$ or Austria\$ or Azerbaijan\$ or Belarus\$ or Belgium or Belgian\$ or Bosnia\$ and Herzegovin\$) or Bulgaria\$ or Croatia\$ or Cyprus or Cyprian\$ or Czechia\$ or Denmark or Danish or Estonia\$ or Finland or Finnish or Georgia\$ or Greece or Greek\$ or Hungary or Hungarian\$ or Iceland\$ or Ireland or Irish or Kosovo\$ or Latvia\$ or Liechtenstein or Lithuania\$ or Luxembourg\$ or Malta or Moldova\$ or Monaco or Montenegro or Netherlands or Dutch\$ or North Macedonia\$ or Norway or Norwegian\$ or Poland or Polish or Portugal or Portuguese or Romania\$ or San Marino or Scandinavia\$ or Serbia\$ or Slovakia\$ or Slovak | 1167978 |

|     |                                                                                                                                                                                                                                                                                                                                                                                                       |         |
|-----|-------------------------------------------------------------------------------------------------------------------------------------------------------------------------------------------------------------------------------------------------------------------------------------------------------------------------------------------------------------------------------------------------------|---------|
|     | Republic or Slovenia\$ or Sweden or Swedish or Switzerland or Swiss or Turkey or Turkish or Ukrain\$).ti,ab,kw,jw.                                                                                                                                                                                                                                                                                    |         |
| 159 | (euro or euros or EUR).ti,ab.                                                                                                                                                                                                                                                                                                                                                                         | 26098   |
| 160 | or/140-159                                                                                                                                                                                                                                                                                                                                                                                            | 4485402 |
| 161 | exp "South and Central America"/                                                                                                                                                                                                                                                                                                                                                                      | 241347  |
| 162 | exp South American/ or exp Central American/                                                                                                                                                                                                                                                                                                                                                          | 16973   |
| 163 | (Latin? America\$ or Latinoamerica\$ or South America\$ or Central America\$ or Caribbean\$).ti,ab,od,kw,jw.                                                                                                                                                                                                                                                                                          | 102565  |
| 164 | (Argentina or Argentinian\$ or Bolivia\$ or Brazil\$ or Brasil\$ or Chile or Chilean\$ or Colombia\$ or Ecuador or Ecuadorian\$ or Paraguay\$ or Peru or Peruvian\$ or Uruguay\$ or Venezuela\$ or Costa Rica\$ or El Salvador or Salvadorian\$ or Guatemala\$ or Guatemaltec\$ or Hondura\$ or Mexico or Mexican\$ or Nicaragua\$ or Panama\$5 or Dominican Republic or Dominican\$).ti,ab,od,kw,jw. | 498238  |
| 165 | (Buenos Aires or La Paz or Sucre or Rio de Janeiro or Sao Paulo or Santiago or Valparaiso or Concepcion or Bogota or Quito or Asuncion or Lima or Montevideo or Caracas or San Salvador or Tegucigalpa or Managua or Santo Domingo).ti,ab,jw.                                                                                                                                                         | 61799   |
| 166 | or/161-165                                                                                                                                                                                                                                                                                                                                                                                            | 586107  |
| 167 | (Global\$2 or worldwide or world wide).ti,ab,hw.                                                                                                                                                                                                                                                                                                                                                      | 878268  |
| 168 | International.ti.                                                                                                                                                                                                                                                                                                                                                                                     | 98547   |
| 169 | or/167-168                                                                                                                                                                                                                                                                                                                                                                                            | 968039  |
| 170 | 120 or 139 or 160 or 166 or 169                                                                                                                                                                                                                                                                                                                                                                       | 9001213 |
| 171 | 97 and 170                                                                                                                                                                                                                                                                                                                                                                                            | 3620536 |
| 172 | 112 or 171                                                                                                                                                                                                                                                                                                                                                                                            | 4076674 |
| 173 | 15 and 39                                                                                                                                                                                                                                                                                                                                                                                             | 21369   |
| 174 | 172 and 173                                                                                                                                                                                                                                                                                                                                                                                           | 4354    |



|     |                                                                                                                                                                                                                                                                                                                                                                                                                                                                                                                                                                                                                                                                                                                                                                                                                                       |        |
|-----|---------------------------------------------------------------------------------------------------------------------------------------------------------------------------------------------------------------------------------------------------------------------------------------------------------------------------------------------------------------------------------------------------------------------------------------------------------------------------------------------------------------------------------------------------------------------------------------------------------------------------------------------------------------------------------------------------------------------------------------------------------------------------------------------------------------------------------------|--------|
| 175 | limit 174 to yr="2000 -Current"                                                                                                                                                                                                                                                                                                                                                                                                                                                                                                                                                                                                                                                                                                                                                                                                       | 3856   |
| 176 | 175 and conference abstract.pt,st.                                                                                                                                                                                                                                                                                                                                                                                                                                                                                                                                                                                                                                                                                                                                                                                                    | 1810   |
| 177 | limit 176 to yr="2000 - 2016"                                                                                                                                                                                                                                                                                                                                                                                                                                                                                                                                                                                                                                                                                                                                                                                                         | 1150   |
| 178 | 175 not 177                                                                                                                                                                                                                                                                                                                                                                                                                                                                                                                                                                                                                                                                                                                                                                                                                           | 2706   |
| 179 | limit 178 to English language                                                                                                                                                                                                                                                                                                                                                                                                                                                                                                                                                                                                                                                                                                                                                                                                         | 2587   |
| 180 | ((neonat\$ or newborn\$ or prenatal or antenatal or postnatal or maternal) adj3 screen\$).ti,ab.                                                                                                                                                                                                                                                                                                                                                                                                                                                                                                                                                                                                                                                                                                                                      | 30089  |
| 181 | (reactivat\$ or re-activat\$).ti,ab,kw.                                                                                                                                                                                                                                                                                                                                                                                                                                                                                                                                                                                                                                                                                                                                                                                               | 60009  |
| 182 | Force of infection\$.ti,ab,kw.                                                                                                                                                                                                                                                                                                                                                                                                                                                                                                                                                                                                                                                                                                                                                                                                        | 627    |
| 183 | (Pregnancy loss\$ or miscarriage\$ or abortion\$ or fetal death\$).ti,ab,kw.                                                                                                                                                                                                                                                                                                                                                                                                                                                                                                                                                                                                                                                                                                                                                          | 102095 |
| 184 | ((targeted or universal or routine) adj2 screen\$).ti,ab.                                                                                                                                                                                                                                                                                                                                                                                                                                                                                                                                                                                                                                                                                                                                                                             | 27346  |
| 185 | (sequelae or long term effects).ti,ab,kw.                                                                                                                                                                                                                                                                                                                                                                                                                                                                                                                                                                                                                                                                                                                                                                                             | 119946 |
| 186 | ((emotional\$ or psycholog\$ or psychosocial\$ or social or psychometric or neuropsycholog\$ or neurodevelopment\$ or development\$ or neurocognit\$ or cognit\$ or mental or language or auditory or audiolog\$ or hearing) adj3 (outcome\$ or function\$ or performance or skills)).ti,ab.                                                                                                                                                                                                                                                                                                                                                                                                                                                                                                                                          | 375977 |
| 187 | (cognitive abilit\$ or cognitive disabilit\$ or cognitive delay\$ or mental development or developmental disabilit\$ or developmental abnormalit\$ or audiologic?? outcome\$ or hearing deficits or hearing impairment or hearing loss or hearing abilit\$ or phonologic?? outcome\$ or auditory perception or speech recognition or word recognition or speech discrimination or language production or language delay or speech perception or language perception or language development or (language adj2 processing) or speech Intelligibility or speech development or verbal ability or (child adj2 development) or emotional problems or peer problems or executive function\$ or working memory or cognitive flexibility or flexible thinking or psychological development or mental health or school performance).ti,ab,kw. | 431617 |

|     |                                                                                                                                                                                                           |          |
|-----|-----------------------------------------------------------------------------------------------------------------------------------------------------------------------------------------------------------|----------|
| 188 | (Polymerase Chain Reaction/ or Real-Time Polymerase Chain Reaction/ or (Polymerase Chain Reaction or PCR or test\$ or screen\$).ti,ab,kw.) and (urin\$ or saliva\$ or oral swab\$ or blood spot\$).ti,ab. | 202074   |
| 189 | Alethia\$.ti,ab,kw.                                                                                                                                                                                       | 5        |
| 190 | or/180-189                                                                                                                                                                                                | 1236930  |
| 191 | 39 or 190                                                                                                                                                                                                 | 6007986  |
| 192 | (Polymerase Chain Reaction/ or Real-Time Polymerase Chain Reaction/ or (Polymerase Chain Reaction or PCR or test\$ or screen\$).ti,ab,kw.) and (urin\$ or saliva\$ or oral swab\$ or blood spot\$).ti,ab. | 202074   |
| 193 | Alethia\$.ti,ab,kw.                                                                                                                                                                                       | 5        |
| 194 | ((neonat\$ or newborn\$ or prenatal or antenatal or postnatal or maternal) adj3 screen\$).ti,ab.                                                                                                          | 30089    |
| 195 | ((targeted or universal or routine) adj2 screen\$).ti,ab.                                                                                                                                                 | 27346    |
| 196 | or/192-195                                                                                                                                                                                                | 251933   |
| 197 | 65 or 69 or 82 or 94 or 196                                                                                                                                                                               | 14150449 |
| 198 | 197 not 86                                                                                                                                                                                                | 11248765 |
| 199 | 170 and 198                                                                                                                                                                                               | 3641527  |
| 200 | 112 or 199                                                                                                                                                                                                | 4097103  |
| 201 | 15 and 191                                                                                                                                                                                                | 26763    |
| 202 | 200 and 201                                                                                                                                                                                               | 5185     |
| 203 | limit 202 to yr="2000 -Current"                                                                                                                                                                           | 4607     |
| 204 | limit 203 to yr="2000 - 2016"                                                                                                                                                                             | 3097     |
| 205 | 204 and conference abstract.pt,st.                                                                                                                                                                        | 1453     |
| 206 | 203 not 205                                                                                                                                                                                               | 3154     |

|     |                               |      |
|-----|-------------------------------|------|
| 207 | limit 206 to English language | 3006 |
|-----|-------------------------------|------|

18

19

20 **Supplemental Table 6. Widened search strategy for LILACS**

|                             | LILACS (Latin American and Caribbean Health Sciences Literature)<br><br>(Medline not included)                                                                                                                                                                                                                                                                                                                                                                                                                                                                                                                                                                                                                                                                                                                                                                                                                                                                                                                                                                                                                                                                                                                                                                                                                                                                                                                                                                                                                                                                                                                                                                                                                                                                                                      |      |
|-----------------------------|-----------------------------------------------------------------------------------------------------------------------------------------------------------------------------------------------------------------------------------------------------------------------------------------------------------------------------------------------------------------------------------------------------------------------------------------------------------------------------------------------------------------------------------------------------------------------------------------------------------------------------------------------------------------------------------------------------------------------------------------------------------------------------------------------------------------------------------------------------------------------------------------------------------------------------------------------------------------------------------------------------------------------------------------------------------------------------------------------------------------------------------------------------------------------------------------------------------------------------------------------------------------------------------------------------------------------------------------------------------------------------------------------------------------------------------------------------------------------------------------------------------------------------------------------------------------------------------------------------------------------------------------------------------------------------------------------------------------------------------------------------------------------------------------------------|------|
| <b>Search Platform:</b>     | VHL – Virtual Library<br><br><a href="https://lilacs.bvsalud.org/en/">https://lilacs.bvsalud.org/en/</a>                                                                                                                                                                                                                                                                                                                                                                                                                                                                                                                                                                                                                                                                                                                                                                                                                                                                                                                                                                                                                                                                                                                                                                                                                                                                                                                                                                                                                                                                                                                                                                                                                                                                                            |      |
| <b>Date of Search:</b>      | December 14, 2020                                                                                                                                                                                                                                                                                                                                                                                                                                                                                                                                                                                                                                                                                                                                                                                                                                                                                                                                                                                                                                                                                                                                                                                                                                                                                                                                                                                                                                                                                                                                                                                                                                                                                                                                                                                   |      |
| <b>Date Range Searched:</b> | 2000-2020                                                                                                                                                                                                                                                                                                                                                                                                                                                                                                                                                                                                                                                                                                                                                                                                                                                                                                                                                                                                                                                                                                                                                                                                                                                                                                                                                                                                                                                                                                                                                                                                                                                                                                                                                                                           |      |
| #                           | Search Terms                                                                                                                                                                                                                                                                                                                                                                                                                                                                                                                                                                                                                                                                                                                                                                                                                                                                                                                                                                                                                                                                                                                                                                                                                                                                                                                                                                                                                                                                                                                                                                                                                                                                                                                                                                                        | Hits |
| 1                           | ((mh:("Cytomegalovirus") OR mh:("Cytomegalovirus Infections") OR tw:("Cytomegalovirus") OR tw:("cmv") OR tw:("hcmv") OR tw:("ccmv") OR tw:("citomegalovirus") OR tw:("human herpesvirus 5") OR tw:("human herpes virus 5") OR tw:("human herpesvirus type 5") OR tw:("human herpes virus type 5") OR tw:("HHV 5") OR tw:("HHV5") OR tw:("salivary gland virus")) AND (mh:("Cytomegalovirus Infections/EP") OR mh:("Cytomegalovirus Infections/MO") OR mh:("Virus Diseases/EP") OR mh:("Virus Diseases/MO") OR mh:("Infant, Newborn, Diseases/EP") OR mh:("Infant, Newborn, Diseases/MO") OR mh:("Infant, Premature, Diseases/EP") OR mh:("Infant, Premature, Diseases/MO") OR mh:("Disease Transmission, Infectious/SN") OR mh:("Infectious Disease Transmission, Vertical/SN") OR mh:("Virus Shedding") OR mh:("Prevalence") OR mh:("Incidence") OR mh:("mortality") OR mh:("Seroepidemiologic Studies") OR mh:("Neonatal Screening") OR tw:(prevalenc*) OR tw:("prevalent") OR tw:(incidenc*) OR tw:("incident") OR tw:(mortalit*) OR tw:(epidemiolog*) OR tw:(seroepidemiolog*) OR tw:(seroprevalen*) OR tw:(seroinciden*) OR tw:(serosurvey*) OR tw:("sero-survey") OR tw:("serosurveillance") OR tw:("sero surveillance") OR tw:(seropositiv*) OR tw:("CMV cases") OR tw:("HCMV cases") OR tw:("CCMV cases") OR tw:(transmission rate*) OR tw:(infection rate*) OR tw:(disease rate*) OR tw:("frequency") OR tw:("neonatal screening") OR tw:("newborn screening") OR tw:("shedding") OR tw:("prenatal screening") OR tw:("maternal screening") OR tw:("dried blood spot testing") OR tw:("targeted screening") OR tw:("universal screening") OR tw:("routine screening") OR tw:(reactivat*) OR tw:("re-activation") OR tw:("force of infection") OR tw:(pregnancy loss*) OR tw:(abortion*) OR | 1266 |

|                                                                                                                                                                                                                                                                                                                                                                                                                                                                                                                                                                                                                                                                                                                                                                                                                                                                                                                                                                                                                                                                                                                                                                                                                                                                                                                                                                                                                                                                                                                                                                                                                                                                                                                                                                                                                                                                                                                                                                                                                                                                                                                                                                                                                                                                                                                                                                                                                                                                                                                                                                                                                                                                                                                                                                                                                                                                         |
|-------------------------------------------------------------------------------------------------------------------------------------------------------------------------------------------------------------------------------------------------------------------------------------------------------------------------------------------------------------------------------------------------------------------------------------------------------------------------------------------------------------------------------------------------------------------------------------------------------------------------------------------------------------------------------------------------------------------------------------------------------------------------------------------------------------------------------------------------------------------------------------------------------------------------------------------------------------------------------------------------------------------------------------------------------------------------------------------------------------------------------------------------------------------------------------------------------------------------------------------------------------------------------------------------------------------------------------------------------------------------------------------------------------------------------------------------------------------------------------------------------------------------------------------------------------------------------------------------------------------------------------------------------------------------------------------------------------------------------------------------------------------------------------------------------------------------------------------------------------------------------------------------------------------------------------------------------------------------------------------------------------------------------------------------------------------------------------------------------------------------------------------------------------------------------------------------------------------------------------------------------------------------------------------------------------------------------------------------------------------------------------------------------------------------------------------------------------------------------------------------------------------------------------------------------------------------------------------------------------------------------------------------------------------------------------------------------------------------------------------------------------------------------------------------------------------------------------------------------------------------|
| <p>tw:(miscarriage*) OR tw:(fetal death*) OR tw:(foetal death*) OR tw:(\"sequelae\") OR tw:(\"long term effects\") OR tw:(emotional outcome*) OR tw:(psychological outcome*) OR tw:(social outcome*) OR tw:(neuropsychological outcome*) OR tw:(neurodevelopmental outcome*) OR tw:(developmental outcome*) OR tw:(neurocognitive outcome*) OR tw:(cognitive outcome*) OR tw:(mental outcome*) OR tw:(language outcome*) OR tw:(auditory outcome*) OR tw:(audiological outcome*) OR tw:(hearing outcome*) OR tw:(emotional function*) OR tw:(psychological function*) OR tw:(social function*) OR tw:(neuropsychological function*) OR tw:(neurodevelopmental function*) OR tw:(developmental function*) OR tw:(neurocognitive function*) OR tw:(cognitive function*) OR tw:(mental function*) OR tw:(language function*) OR tw:(auditory function*) OR tw:(audiological function*) OR tw:(hearing function*) OR tw:(emotional performance) OR tw:(psychological performance) OR tw:(social performance) OR tw:(neuropsychological performance) OR tw:(neurodevelopmental performance) OR tw:(developmental performance) OR tw:(neurocognitive performance) OR tw:(cognitive performance) OR tw:(mental performance) OR tw:(language performance) OR tw:(auditory performance) OR tw:(audiological performance) OR tw:(hearing performance) OR tw:(emotional skills) OR tw:(psychological skills) OR tw:(social skills) OR tw:(neuropsychological skills) OR tw:(neurodevelopmental skills) OR tw:(developmental skills) OR tw:(neurocognitive skills) OR tw:(cognitive skills) OR tw:(mental skills) OR tw:(language skills) OR tw:(auditory skills) OR tw:(audiological skills) OR tw:(hearing skills) OR tw:(cognitive abilit*) OR tw:(cognitive disabilit*) OR tw:(cognitive delay*) OR tw:(\"mental development\") OR tw:(developmental disabilit*) OR tw:(developmental abnormalit*) OR tw:(\"hearing deficits\") OR tw:(\"hearing impairment\") OR tw:(\"hearing loss\") OR tw:(hearing abilit*) OR tw:(phonological outcome*) OR tw:(\"auditory perception\") OR tw:(\"speech recognition\") OR tw:(\"word recognition\") OR tw:(\"speech discrimination\") OR tw:(\"language production\") OR tw:(language delay*) OR tw:(\"speech perception\") OR tw:(\"language perception\") OR tw:(\"language development\") OR tw:(\"language processing\") OR tw:(\"speech Intelligibility\") OR tw:(\"speech development\") OR tw:(verbal abilit*) OR tw:(\"child development\") OR tw:(\"emotional problems\") OR tw:(\"peer problems\") OR tw:(executive function*) OR tw:(\"working memory\") OR tw:(\"cognitive flexibility\") OR tw:(\"flexible thinking\") OR tw:(\"psychological development\") OR tw:(\"mental health\") OR tw:(\"school performance\") OR tw:(mh:(\"polymerase chain reaction\") OR tw:(\"polymerase chain reaction\") OR tw:(\"PCR\") OR</p> |
|-------------------------------------------------------------------------------------------------------------------------------------------------------------------------------------------------------------------------------------------------------------------------------------------------------------------------------------------------------------------------------------------------------------------------------------------------------------------------------------------------------------------------------------------------------------------------------------------------------------------------------------------------------------------------------------------------------------------------------------------------------------------------------------------------------------------------------------------------------------------------------------------------------------------------------------------------------------------------------------------------------------------------------------------------------------------------------------------------------------------------------------------------------------------------------------------------------------------------------------------------------------------------------------------------------------------------------------------------------------------------------------------------------------------------------------------------------------------------------------------------------------------------------------------------------------------------------------------------------------------------------------------------------------------------------------------------------------------------------------------------------------------------------------------------------------------------------------------------------------------------------------------------------------------------------------------------------------------------------------------------------------------------------------------------------------------------------------------------------------------------------------------------------------------------------------------------------------------------------------------------------------------------------------------------------------------------------------------------------------------------------------------------------------------------------------------------------------------------------------------------------------------------------------------------------------------------------------------------------------------------------------------------------------------------------------------------------------------------------------------------------------------------------------------------------------------------------------------------------------------------|

|   |                                                                                                                                                                                                                                                                                                                                                                                                                                                                                                                                                                                                                                                                                                                                                                                                                                                                                                                                                                                                                                                                                                                                                                                                                                                                                                                                                                                                                                                                                                                                                                                                                                                                                                                                                                                                                                                                                                                                                                                                                                                                                                                                                                                                                                                                                                                                                                                                                                                                                  |     |
|---|----------------------------------------------------------------------------------------------------------------------------------------------------------------------------------------------------------------------------------------------------------------------------------------------------------------------------------------------------------------------------------------------------------------------------------------------------------------------------------------------------------------------------------------------------------------------------------------------------------------------------------------------------------------------------------------------------------------------------------------------------------------------------------------------------------------------------------------------------------------------------------------------------------------------------------------------------------------------------------------------------------------------------------------------------------------------------------------------------------------------------------------------------------------------------------------------------------------------------------------------------------------------------------------------------------------------------------------------------------------------------------------------------------------------------------------------------------------------------------------------------------------------------------------------------------------------------------------------------------------------------------------------------------------------------------------------------------------------------------------------------------------------------------------------------------------------------------------------------------------------------------------------------------------------------------------------------------------------------------------------------------------------------------------------------------------------------------------------------------------------------------------------------------------------------------------------------------------------------------------------------------------------------------------------------------------------------------------------------------------------------------------------------------------------------------------------------------------------------------|-----|
|   | <p>tw:(test*) OR tw:(screen*) AND (tw:(urin*) OR tw:(saliva*) OR tw:(oral swab*) OR tw:(blood spot*)) OR tw:(alethia*)) AND ( db:("LILACS" OR "IBECs" OR "BINACIS" OR "CUMED" OR "SES-SP" OR "LIPECS" OR "BBO" OR "MedCarib" OR "BRISA" OR "coleccionaSUS" OR "BDENF" OR "ARGMSAL"))</p>                                                                                                                                                                                                                                                                                                                                                                                                                                                                                                                                                                                                                                                                                                                                                                                                                                                                                                                                                                                                                                                                                                                                                                                                                                                                                                                                                                                                                                                                                                                                                                                                                                                                                                                                                                                                                                                                                                                                                                                                                                                                                                                                                                                         |     |
| 2 | <p>((mh:("Cytomegalovirus") OR mh:("Cytomegalovirus Infections") OR tw:("Cytomegalovirus") OR tw:("cmv") OR tw:("hcmv") OR tw:("ccmv") OR tw:("citomegalovirus") OR tw:("human herpesvirus 5") OR tw:("human herpes virus 5") OR tw:("human herpesvirus type 5") OR tw:("human herpes virus type 5") OR tw:("HHV 5") OR tw:("HHV5") OR tw:("salivary gland virus"))) AND (mh:("Cytomegalovirus Infections/EP") OR mh:("Cytomegalovirus Infections/MO") OR mh:("Virus Diseases/EP") OR mh:("Virus Diseases/MO") OR mh:("Infant, Newborn, Diseases/EP") OR mh:("Infant, Newborn, Diseases/MO") OR mh:("Infant, Premature, Diseases/EP") OR mh:("Infant, Premature, Diseases/MO") OR mh:("Disease Transmission, Infectious/SN") OR mh:("Infectious Disease Transmission, Vertical/SN") OR mh:("Virus Shedding") OR mh:("Prevalence") OR mh:("Incidence") OR mh:("mortality") OR mh:("Seroepidemiologic Studies") OR mh:("Neonatal Screening") OR tw:(prevalenc*) OR tw:("prevalent") OR tw:(incidenc*) OR tw:("incident") OR tw:(mortalit*) OR tw:(epidemiolog*) OR tw:(seroepidemiolog*) OR tw:(seroprevalen*) OR tw:(seroinciden*) OR tw:(serosurvey*) OR tw:("sero-survey") OR tw:("serosurveillance") OR tw:("sero surveillance") OR tw:(seropositiv*) OR tw:("CMV cases") OR tw:("HCMV cases") OR tw:("CCMV cases") OR tw:(transmission rate*) OR tw:(infection rate*) OR tw:(disease rate*) OR tw:("frequency") OR tw:("neonatal screening") OR tw:("newborn screening") OR tw:("shedding") OR tw:("prenatal screening") OR tw:("maternal screening") OR tw:("dried blood spot testing") OR tw:("targeted screening") OR tw:("universal screening") OR tw:("routine screening") OR tw:(reactivat*) OR tw:("re-activation") OR tw:("force of infection") OR tw:(pregnancy loss*) OR tw:(abortion*) OR tw:(miscarriage*) OR tw:(fetal death*) OR tw:(foetal death*) OR tw:("sequelae") OR tw:("long term effects") OR tw:(emotional outcome*) OR tw:(psychological outcome*) OR tw:(social outcome*) OR tw:(neuropsychological outcome*) OR tw:(neurodevelopmental outcome*) OR tw:(developmental outcome*) OR tw:(neurocognitive outcome*) OR tw:(cognitive outcome*) OR tw:(mental outcome*) OR tw:(language outcome*) OR tw:(auditory outcome*) OR tw:(audiological outcome*) OR tw:(hearing outcome*) OR tw:(emotional function*) OR tw:(psychological function*) OR tw:(social function*) OR tw:(neuropsychological function*) OR tw:(neurodevelopmental function*) OR</p> | 882 |

|   |                                                                                                                                                                                                                                                                                                                                                                                                                                                                                                                                                                                                                                                                                                                                                                                                                                                                                                                                                                                                                                                                                                                                                                                                                                                                                                                                                                                                                                                                                                                                                                                                                                                                                                                                                                                                                                                                                                                                                                                                                                                                                                                                                                                                                                                                                                                                                                                                                                                                           |     |
|---|---------------------------------------------------------------------------------------------------------------------------------------------------------------------------------------------------------------------------------------------------------------------------------------------------------------------------------------------------------------------------------------------------------------------------------------------------------------------------------------------------------------------------------------------------------------------------------------------------------------------------------------------------------------------------------------------------------------------------------------------------------------------------------------------------------------------------------------------------------------------------------------------------------------------------------------------------------------------------------------------------------------------------------------------------------------------------------------------------------------------------------------------------------------------------------------------------------------------------------------------------------------------------------------------------------------------------------------------------------------------------------------------------------------------------------------------------------------------------------------------------------------------------------------------------------------------------------------------------------------------------------------------------------------------------------------------------------------------------------------------------------------------------------------------------------------------------------------------------------------------------------------------------------------------------------------------------------------------------------------------------------------------------------------------------------------------------------------------------------------------------------------------------------------------------------------------------------------------------------------------------------------------------------------------------------------------------------------------------------------------------------------------------------------------------------------------------------------------------|-----|
|   | <p>tw:(developmental function*) OR tw:(neurocognitive function*) OR tw:(cognitive function*) OR tw:(mental function*) OR tw:(language function*) OR tw:(auditory function*) OR tw:(audiological function*) OR tw:(hearing function*) OR tw:(emotional performance) OR tw:(psychological performance) OR tw:(social performance) OR tw:(neuropsychological performance) OR tw:(neurodevelopmental performance) OR tw:(developmental performance) OR tw:(neurocognitive performance) OR tw:(cognitive performance) OR tw:(mental performance) OR tw:(language performance) OR tw:(auditory performance) OR tw:(audiological performance) OR tw:(hearing performance) OR tw:(emotional skills) OR tw:(psychological skills) OR tw:(social skills) OR tw:(neuropsychological skills) OR tw:(neurodevelopmental skills) OR tw:(developmental skills) OR tw:(neurocognitive skills) OR tw:(cognitive skills) OR tw:(mental skills) OR tw:(language skills) OR tw:(auditory skills) OR tw:(audiological skills) OR tw:(hearing skills) OR tw:(cognitive abilit*) OR tw:(cognitive disabilit*) OR tw:(cognitive delay*) OR tw:(("mental development")) OR tw:(developmental disabilit*) OR tw:(developmental abnormalit*) OR tw:(("hearing deficits")) OR tw:(("hearing impairment")) OR tw:(("hearing loss")) OR tw:(hearing abilit*) OR tw:(phonological outcome*) OR tw:(("auditory perception")) OR tw:(("speech recognition")) OR tw:(("word recognition")) OR tw:(("speech discrimination")) OR tw:(("language production")) OR tw:(language delay*) OR tw:(("speech perception")) OR tw:(("language perception")) OR tw(("language development")) OR tw:(("language processing")) OR ("speech Intelligibility") OR tw:(("speech development")) OR tw:(verbal abilit*) OR tw:(("child development")) OR tw:(("emotional problems")) OR ("peer problems") OR tw:(executive function*) OR tw:(("working memory")) OR tw:(("cognitive flexibility")) OR tw:(("flexible thinking")) OR ("psychological development") OR tw:(("mental health")) OR tw:(("school performance")) OR ((mh:(("polymerase chain reaction")) OR tw:(("polymerase chain reaction")) OR tw:(("PCR")) OR tw:(test*) OR tw:(screen*)) AND (tw:(urin*) OR tw:(saliva*) OR tw:(oral swab*) OR tw:(blood spot*)) OR tw:(alethia*)) AND ( db:(("LILACS" OR "IBECS" OR "BINACIS" OR "CUMED" OR "BBO" OR "LIPECS" OR "SES-SP" OR "BRISA" OR "coleccionaSUS" OR "ARGMSAL")) AND (year_cluster:[2000 TO 2020])</p> |     |
| 3 | <p>((mh:(("Cytomegalovirus")) OR mh:(("Cytomegalovirus Infections")) OR tw:(("Cytomegalovirus")) OR tw:(("cmv")) OR tw:(("hcmv")) OR tw:(("ccmv")) OR tw:(("citomegalovirus")) OR tw:(("human herpesvirus 5")) OR tw:(("human herpes virus 5")) OR tw:(("human herpesvirus type 5")) OR tw:(("human herpes virus type 5")) OR tw:(("HHV 5")) OR tw:(("HHV5")) OR tw:(("salivary gland virus"))) AND (mh:(("Cytomegalovirus</p>                                                                                                                                                                                                                                                                                                                                                                                                                                                                                                                                                                                                                                                                                                                                                                                                                                                                                                                                                                                                                                                                                                                                                                                                                                                                                                                                                                                                                                                                                                                                                                                                                                                                                                                                                                                                                                                                                                                                                                                                                                            | 186 |

|  |                                                                                                                                                                                                                                                                                                                                                                                                                                                                                                                                                                                                                                                                                                                                                                                                                                                                                                                                                                                                                                                                                                                                                                                                                                                                                                                                                                                                                                                                                                                                                                                                                                                                                                                                                                                                                                                                                                                                                                                                                                                                                                                                                                                                                                                                                                                                                                                                                                                                                                                                                                                                                                                                                                                                         |  |
|--|-----------------------------------------------------------------------------------------------------------------------------------------------------------------------------------------------------------------------------------------------------------------------------------------------------------------------------------------------------------------------------------------------------------------------------------------------------------------------------------------------------------------------------------------------------------------------------------------------------------------------------------------------------------------------------------------------------------------------------------------------------------------------------------------------------------------------------------------------------------------------------------------------------------------------------------------------------------------------------------------------------------------------------------------------------------------------------------------------------------------------------------------------------------------------------------------------------------------------------------------------------------------------------------------------------------------------------------------------------------------------------------------------------------------------------------------------------------------------------------------------------------------------------------------------------------------------------------------------------------------------------------------------------------------------------------------------------------------------------------------------------------------------------------------------------------------------------------------------------------------------------------------------------------------------------------------------------------------------------------------------------------------------------------------------------------------------------------------------------------------------------------------------------------------------------------------------------------------------------------------------------------------------------------------------------------------------------------------------------------------------------------------------------------------------------------------------------------------------------------------------------------------------------------------------------------------------------------------------------------------------------------------------------------------------------------------------------------------------------------------|--|
|  | <p>Infections/EP") OR mh:("Cytomegalovirus Infections/MO") OR mh:("Virus Diseases/EP") OR mh:("Virus Diseases/MO") OR mh:("Infant, Newborn, Diseases/EP") OR mh:("Infant, Newborn, Diseases/MO") OR mh:("Infant, Premature, Diseases/EP") OR mh:("Infant, Premature, Diseases/MO") OR mh:("Disease Transmission, Infectious/SN") OR mh:("Infectious Disease Transmission, Vertical/SN") OR mh:("Virus Shedding") OR mh:("Prevalence") OR mh:("Incidence") OR mh:("mortality") OR mh:("Seroepidemiologic Studies") OR mh:("Neonatal Screening") OR tw:(prevalenc*) OR tw:("prevalent") OR tw:(incidenc*) OR tw:("incident") OR tw:(mortalit*) OR tw:(epidemiolog*) OR tw:(seroepidemiolog*) OR tw:(seroprevalen*) OR tw:(seroinciden*) OR tw:(serosurvey*) OR tw:("sero-survey") OR tw:("serosurveillance") OR tw:("sero surveillance") OR tw:(seropositiv*) OR tw:("CMV cases") OR tw:("HCMV cases") OR tw:("CCMV cases") OR tw:(transmission rate*) OR tw:(infection rate*) OR tw:(disease rate*) OR tw:("frequency") OR tw:("neonatal screening") OR tw:("newborn screening") OR tw:("shedding") OR tw:("prenatal screening") OR tw:("maternal screening") OR tw:("dried blood spot testing") OR tw:("targeted screening") OR tw:("universal screening") OR tw:("routine screening") OR tw:(reactivat*) OR tw:("re-activation") OR tw:("force of infection") OR tw:(pregnancy loss*) OR tw:(abortion*) OR tw:(miscarriage*) OR tw:(fetal death*) OR tw:(foetal death*) OR tw:("sequelae") OR tw:("long term effects") OR tw:(emotional outcome*) OR tw:(psychological outcome*) OR tw:(social outcome*) OR tw:(neuropsychological outcome*) OR tw:(neurodevelopmental outcome*) OR tw:(developmental outcome*) OR tw:(neurocognitive outcome*) OR tw:(cognitive outcome*) OR tw:(mental outcome*) OR tw:(language outcome*) OR tw:(auditory outcome*) OR tw:(audiological outcome*) OR tw:(hearing outcome*) OR tw:(emotional function*) OR tw:(psychological function*) OR tw:(social function*) OR tw:(neuropsychological function*) OR tw:(neurodevelopmental function*) OR tw:(developmental function*) OR tw:(neurocognitive function*) OR tw:(cognitive function*) OR tw:(mental function*) OR tw:(language function*) OR tw:(auditory function*) OR tw:(audiological function*) OR tw:(hearing function*) OR tw:(emotional performance) OR tw:(psychological performance) OR tw:(social performance) OR tw:(neuropsychological performance) OR tw:(neurodevelopmental performance) OR tw:(developmental performance) OR tw:(neurocognitive performance) OR tw:(cognitive performance) OR tw:(mental performance) OR tw:(language performance) OR tw:(auditory performance) OR tw:(audiological performance) OR tw:(hearing</p> |  |
|--|-----------------------------------------------------------------------------------------------------------------------------------------------------------------------------------------------------------------------------------------------------------------------------------------------------------------------------------------------------------------------------------------------------------------------------------------------------------------------------------------------------------------------------------------------------------------------------------------------------------------------------------------------------------------------------------------------------------------------------------------------------------------------------------------------------------------------------------------------------------------------------------------------------------------------------------------------------------------------------------------------------------------------------------------------------------------------------------------------------------------------------------------------------------------------------------------------------------------------------------------------------------------------------------------------------------------------------------------------------------------------------------------------------------------------------------------------------------------------------------------------------------------------------------------------------------------------------------------------------------------------------------------------------------------------------------------------------------------------------------------------------------------------------------------------------------------------------------------------------------------------------------------------------------------------------------------------------------------------------------------------------------------------------------------------------------------------------------------------------------------------------------------------------------------------------------------------------------------------------------------------------------------------------------------------------------------------------------------------------------------------------------------------------------------------------------------------------------------------------------------------------------------------------------------------------------------------------------------------------------------------------------------------------------------------------------------------------------------------------------------|--|



performance) OR tw:(emotional skills) OR tw:(psychological skills) OR tw:(social skills) OR tw:(neuropsychological skills) OR tw:(neurodevelopmental skills) OR tw:(developmental skills) OR tw:(neurocognitive skills) OR tw:(cognitive skills) OR tw:(mental skills) OR tw:(language skills) OR tw:(auditory skills) OR tw:(audiological skills) OR tw:(hearing skills) OR tw:(cognitive abilit\*) OR tw:(cognitive disabilit\*) OR tw:(cognitive delay\*) OR tw:(("mental development")) OR tw:(developmental disabilit\*) OR tw:(developmental abnormalit\*) OR tw:(("hearing deficits")) OR tw:(("hearing impairment")) OR tw:(("hearing loss")) OR tw:(hearing abilit\*) OR tw:(phonological outcome\*) OR tw:(("auditory perception")) OR tw:(("speech recognition")) OR tw:(("word recognition")) OR tw:(("speech discrimination")) OR tw:(("language production")) OR tw:(language delay\*) OR tw:(("speech perception")) OR tw:(("language perception")) OR tw(("language development")) OR tw:(("language processing")) OR ("speech Intelligibility") OR tw:(("speech development")) OR tw:(verbal abilit\*) OR tw:(("child development")) OR tw:(("emotional problems")) OR ("peer problems") OR tw:(executive function\*) OR tw:(("working memory")) OR tw:(("cognitive flexibility")) OR tw:(("flexible thinking")) OR ("psychological development") OR tw:(("mental health")) OR tw:(("school performance")) OR ((mh:(("polymerase chain reaction")) OR tw:(("polymerase chain reaction")) OR tw:(("PCR")) OR tw:(test\*) OR tw:(screen\*)) AND (tw:(urin\*) OR tw:(saliva\*) OR tw:(oral swab\*) OR tw:(blood spot\*)) OR tw:(alethia\*)) AND ( db:(("LILACS" OR "IBECs" OR "BINACIS" OR "CUMED" OR "BBO" OR "LIPECS" OR "SES-SP" OR "BRISA" OR "coleccionaSUS" OR "ARGMSAL")) AND la:(("en"))) AND (year\_cluster:[2000 TO 2020])

21

22

23

24 **2. Supplement 2. Inclusion and exclusion criteria**

25 ***Supplemental Table 7. PICO(+) framework for developing the search strategy and initial eligibility***  
 26 ***criteria; stages: abstract review, full text review, up to extraction***

| Category   | Inclusion criteria                              | Exclusion criteria                                  |
|------------|-------------------------------------------------|-----------------------------------------------------|
| Population | General population (latent CMV stage), all ages | Blood and solid organ donors, transplant recipients |

|              |                                                                                                                                                                                                                                                                                                                                                                                                                                                                                                                                                                                                                                                                                                                |                                                                                          |
|--------------|----------------------------------------------------------------------------------------------------------------------------------------------------------------------------------------------------------------------------------------------------------------------------------------------------------------------------------------------------------------------------------------------------------------------------------------------------------------------------------------------------------------------------------------------------------------------------------------------------------------------------------------------------------------------------------------------------------------|------------------------------------------------------------------------------------------|
|              | Toddlers/children 0-5 years of age (female and male)<br>Adolescents and females/males 9-40 years of age<br>HIV-positive mothers and HIV-infected babies<br>Other specific subpopulations or immunocompromised groups                                                                                                                                                                                                                                                                                                                                                                                                                                                                                           | High risk, immunosuppressed groups                                                       |
| Intervention | No restriction                                                                                                                                                                                                                                                                                                                                                                                                                                                                                                                                                                                                                                                                                                 | No additional criteria specified                                                         |
| Comparator   | No restriction                                                                                                                                                                                                                                                                                                                                                                                                                                                                                                                                                                                                                                                                                                 | No additional criteria specified                                                         |
| Outcomes     | <u>Epidemiology/seroepidemiology of cytomegalovirus (both CMV and cCMV)/infections</u> <ul style="list-style-type: none"> <li>▪ Seroprevalence, prevalence</li> <li>▪ Incidence, force of infection</li> <li>▪ Mortality</li> <li>▪ Infection rate</li> <li>▪ Prevalence of CMV shedding (includes demographic breakdown)</li> <li>▪ Vertical (pregnant women to fetus/child, child to adults) and horizontal (among adults) transmission rate</li> <li>▪ Morbidity</li> <li>▪ Long-term sequelae, long-term effects</li> <li>▪ Pregnancy loss</li> <li>▪ (including demographic breakdown: age distribution, serostatus, immunocompromised status, social status, education level, race/ethnicity)</li> </ul> | No additional criteria specified                                                         |
| Study types  | Seroepidemiologic studies, epidemiologic studies<br>Cross-sectional, longitudinal, surveillance studies, registries<br>Mathematical models<br>Systematic reviews, meta-analyses                                                                                                                                                                                                                                                                                                                                                                                                                                                                                                                                | Clinical trials<br>Form of publication: comments, letters, editorials (full text review) |
| Language     | English                                                                                                                                                                                                                                                                                                                                                                                                                                                                                                                                                                                                                                                                                                        | Other than English                                                                       |
| Country      | Australia<br>Latin America, particularly Brazil<br>Canada<br>Europe (includes entirety of Europe and was not limited to EU5 [France, Germany, Italy, Spain, United Kingdom])<br>Israel<br>Japan<br>United States<br>Global (international, worldwide)                                                                                                                                                                                                                                                                                                                                                                                                                                                          | No additional criteria specified                                                         |

|                                         |                                                                                                                                                           |                                  |
|-----------------------------------------|-----------------------------------------------------------------------------------------------------------------------------------------------------------|----------------------------------|
| Search time frame                       | <ul style="list-style-type: none"> <li>▪ 2000-2020 (journal articles)</li> <li>▪ 2017-2020 (conference abstracts)</li> </ul>                              | No additional criteria specified |
| Data period to which the results relate | <ul style="list-style-type: none"> <li>▪ 2010-2020 (journal articles)</li> <li>▪ A period including any years from the 2000-2020 period (SLRs)</li> </ul> | No additional criteria specified |

28 **Supplemental Table 8. PICO(+) framework for eligibility criteria; stages: Final inclusion to the SLR for**  
 29 **the purpose of this report**

| Category                | Inclusion criteria                                                                                                                                                                                                                                                                                                                                                            | Exclusion criteria                                                                                                                                                                                          |
|-------------------------|-------------------------------------------------------------------------------------------------------------------------------------------------------------------------------------------------------------------------------------------------------------------------------------------------------------------------------------------------------------------------------|-------------------------------------------------------------------------------------------------------------------------------------------------------------------------------------------------------------|
| Population              | Seroprevalence, prevalence: adults, women of reproductive age<br><br>Shedding, transmission: newborn, infants, children, adolescent, adults                                                                                                                                                                                                                                   | -                                                                                                                                                                                                           |
| Outcomes                | <ul style="list-style-type: none"> <li>▪ Seroprevalence, prevalence based on a non-IgM or IgG diagnostic method (eg, reverse transcription-polymerase chain reaction)</li> <li>▪ Prevalence of CMV shedding (including demographic breakdown)</li> <li>▪ Vertical (pregnant women to fetus/child, child to adults) and horizontal (among adults) transmission rate</li> </ul> | <ul style="list-style-type: none"> <li>▪ Incidence, force of infection</li> <li>▪ Mortality</li> <li>▪ Infection rate</li> <li>▪ Long-term sequelae, long-term effects</li> <li>▪ Pregnancy loss</li> </ul> |
| Study/publication types | -                                                                                                                                                                                                                                                                                                                                                                             | <ul style="list-style-type: none"> <li>▪ Systematic reviews, meta-analyses</li> <li>▪ Case series</li> <li>▪ Conference abstracts/posters</li> </ul>                                                        |
| Sample size             | -                                                                                                                                                                                                                                                                                                                                                                             | Sample size <100                                                                                                                                                                                            |

30

31

### 3. Supplement 3. Study characteristics

**Supplemental Table 9. Characteristics of the 29 studies included in the manuscript**

| Reference            | Study design  | Country                | Study period | Study population                                                                                                                                                                    | N                                                                                                                                                                                                                                                                                                             | Age distribution | Sex            | Diagnostic method                                                                                           |
|----------------------|---------------|------------------------|--------------|-------------------------------------------------------------------------------------------------------------------------------------------------------------------------------------|---------------------------------------------------------------------------------------------------------------------------------------------------------------------------------------------------------------------------------------------------------------------------------------------------------------|------------------|----------------|-------------------------------------------------------------------------------------------------------------|
| <b>Europe</b>        |               |                        |              |                                                                                                                                                                                     |                                                                                                                                                                                                                                                                                                               |                  |                |                                                                                                             |
| Arapović (2020) [32] | Observational | Bosnia and Herzegovina | 2010-2019    | Children and adults seeking care at the University Clinical Hospital Mostar (UCHM), pregnant women delivering at UCHM, and infants born between July 2011 and February 2013 at UCHM | Age 20-34: 1686; age 35-64: 1346; age >65: 385<br>Parity-no: 729; yes: 1180<br>Previous abortion- no: 1616; yes: 293<br>Pregnancy complications- Normal: 1384; Affected: 545<br>Gestational age: Term (> 37 w): 1831<br>Mode of delivery-Vaginal: 1665; C.S: 240<br>Birth weight (g)- < 3000: 240; 3000–4000: | ≥1 year          | Males, females | Serum samples were analyzed for CMV IgG antibodies using ELFA; cord blood specimens were tested using ELISA |

|                            |                                                                            |         |           |                                                                                                                                                                           |                                                                                                                                                                 |                       |                |                                                                                                                                                                 |
|----------------------------|----------------------------------------------------------------------------|---------|-----------|---------------------------------------------------------------------------------------------------------------------------------------------------------------------------|-----------------------------------------------------------------------------------------------------------------------------------------------------------------|-----------------------|----------------|-----------------------------------------------------------------------------------------------------------------------------------------------------------------|
|                            |                                                                            |         |           |                                                                                                                                                                           | 1419; > 4000:<br>244<br><br>Newborn complications-<br>No: 1350; yes:<br>579                                                                                     |                       |                |                                                                                                                                                                 |
| Vilibić-Čavlek (2017) [48] | Prospective cohort                                                         | Croatia | 2013-2015 | Patients residing at all Croatian counties were tested at 2 large medical institutions (Croatian National Institute of Public Health and Clinical Hospital Center Zagreb) | Age 20-29: 431; age 30-29: 584; age 40-49: 478; age 50-59: 305; age 60+: 288<br><br>Hemodialysis patients: 314<br><br>Pregnant women with normal pregnancy: 238 | Adults aged ≥20 years | Males, females | Consecutive serum samples were tested for presence of CMV specific IgG and IgM by ELISA and ELFA; positive samples were tested for IgG avidity by ELISA or ELFA |
| Antona (2017) [29]         | Population-based seroprevalence survey, 2-stage stratified sampling design | France  | 2010      | Individuals living in metropolitan France and attending private microbiological laboratories for blood testing                                                            | Male: 1230; female: 1306<br><br>Age 25-34: 751; age 35-49: 763                                                                                                  | 15-49 years           | Males, females | CMV IgG ELISA                                                                                                                                                   |

|                      |                              |        |                   |                                                                                                                                                                            |                                                                                                                 |                  |                |                                                                                                                  |
|----------------------|------------------------------|--------|-------------------|----------------------------------------------------------------------------------------------------------------------------------------------------------------------------|-----------------------------------------------------------------------------------------------------------------|------------------|----------------|------------------------------------------------------------------------------------------------------------------|
| Grosjean (2014) [57] | Prospective                  | France | 2014 <sup>a</sup> | Children admitted to the emergency unit of Limoges Hospital in southern France and children who attended 6 daycare centers that greatly varied in size and characteristics | Children who attended six DCCs (day care centers): 256<br><br>Children admitted to the emergency unit (EU): 369 | 3 months-6 years | Males, females | RT-PCR targeting UL83 gene                                                                                       |
| Puccio (2014) [36]   | Retrospective (chart review) | Italy  | 2012              | Mothers of live babies born in the Department of Sciences for Health Promotion and Mother and Child Care of the University of Palermo                                      | Overall: 797                                                                                                    | 16-51 years      | Females        | Tested for anti-IgG and IgM antibodies during pregnancy                                                          |
| Barlinn (2014) [33]  | Observational                | Norway | 2010-2011         | Pregnant women from Drammen Hospital, Vestre Viken Hospital Trust Buskerud, and                                                                                            | General: 2000<br>Age 20-24: 281;<br>age 25-29: 661;<br>age 30-34: 637;<br>age 35-39: 326                        | 16-46 years      | Females        | Serum samples were analyzed for anti-CMV IgG; anti-CMV IgM was assessed in samples from St. Olav's Hospital only |

|                      |               |        |           |                                                                                                                                                                            |                                                                                                                                                                                                                                                                                                                     |             |         |                                                                                                |
|----------------------|---------------|--------|-----------|----------------------------------------------------------------------------------------------------------------------------------------------------------------------------|---------------------------------------------------------------------------------------------------------------------------------------------------------------------------------------------------------------------------------------------------------------------------------------------------------------------|-------------|---------|------------------------------------------------------------------------------------------------|
|                      |               |        |           | St. Olav's Hospital in Trondheim                                                                                                                                           | General, Mid-Norway, IgM: 2000                                                                                                                                                                                                                                                                                      |             |         |                                                                                                |
| Plewik (2017) [35]   | Observational | Poland | 2015      | Healthy women from the Biała Podlaska District                                                                                                                             | General: 175                                                                                                                                                                                                                                                                                                        | 16-35 years | Females | Blood samples were tested for presence of anti-CMV IgG by ELISA                                |
| Wujcicka (2014) [38] | Prospective   | Poland | 2010-2011 | Pregnant women who attended the outpatient obstetric clinics and were treated at the Polish Mother's Memorial Hospital Research Institute and the Ludwig Rydygier Hospital | Overall: 1250<br>Age 21-25: 199; age 26-30: 509; age 31-35: 362; age ≥ 36: 130<br>Education-higher: 667; secondary: 369; Primary and vocational: 144<br>Having children-No: 691; Yes: 479<br>Financial status-Average: 359; Good: 616; Unknown: 151<br>Risk of occupational contact with children-No: 799; Yes: 373 | 16-45 years | Females | Serum anti-HCMV IgG and IgM antibody levels were assayed by ELISA; IgG avidity was also tested |



|                       |               |         |           |                                                                                                                                                                                                                                     |                                                                                                                                                                                                                                              |                     |         |                                                          |
|-----------------------|---------------|---------|-----------|-------------------------------------------------------------------------------------------------------------------------------------------------------------------------------------------------------------------------------------|----------------------------------------------------------------------------------------------------------------------------------------------------------------------------------------------------------------------------------------------|---------------------|---------|----------------------------------------------------------|
| Siennicka (2017) [37] | Retrospective | Poland  | 2010-2011 | Serum from women of reproductive age were selected from a serum bank maintained by the National Institute of Public Health-National Institute of Hygiene; samples were selected with the intent to represent the general population | Overall: 712<br>Age <30: 218;<br>age 30–34: 105;<br>age 35–39: 133;<br>age 40–44: 114;<br>age 45+: 142<br><br>Residence-Rural: 323; urban: 388<br><br>Region-Wielkopolskie: 177; Lubelskie: 122;<br>Mazowieckie: 200;<br>Świętokrzyskie: 116 | Of childbearing age | Females | Serum samples were tested for CMV IgG antibodies         |
| Gorun (2020) [34]     | Retrospective | Romania | 2015-2018 | Pregnant women tested at SC Bioclinica srl, Timisoara, Romania                                                                                                                                                                      | General: 7485<br><br>Urban: 3570;<br>urban age 21-25: 526; urban age 26-30: 1331;<br>urban age 31-35: 1057; urban age >35: 565<br><br>Rural: 1930; rural age <20: 185;<br>rural age 21-25: 2509; rural age 26-30: 651; rural                 | NA                  | Females | Serum samples were evaluated for anti-CMV IgG antibodies |

|                              |                                         |                |                   |                                                                                          |                                                                                                                                |                               |                |                                                                                                                                |
|------------------------------|-----------------------------------------|----------------|-------------------|------------------------------------------------------------------------------------------|--------------------------------------------------------------------------------------------------------------------------------|-------------------------------|----------------|--------------------------------------------------------------------------------------------------------------------------------|
|                              |                                         |                |                   |                                                                                          | age 31-35: 391;<br>rural > 35: 194                                                                                             |                               |                |                                                                                                                                |
| Alari-Pahissa (2018) [46]    | Prospective cross-sectional multicenter | Spain          | 2018 <sup>a</sup> | Healthy adults from 3 hospitals integrated in the Spanish Network for MS Research (REEM) | General: 155                                                                                                                   | Adults (mean age: 37.6 years) | Males, females | Selected panel of immunological markers of differentiated/senescent T cells previously related to CMV infection were evaluated |
| Gonzalez-Quijada (2014) [54] | Case-control                            | Spain          | 2011-2012         | Hospitalized patients                                                                    | Control: 290<br>Cases (patients with prevalent or incident coronary heart, cerebrovascular or peripheral artery, disease): 164 | ≥65 years                     | Males, females | Blood samples were analyzed for CMV IgG antibody by ELISA                                                                      |
| Firth (2016) [53]            | Prospective                             | United Kingdom | 2016 <sup>a</sup> | Elderly adults who participated in the Scottish Mental Survey of 1947 when aged 11 years | General: 1054                                                                                                                  | 70 years                      | Males, females | CMV was measured in plasma samples (collected at aged 70 years) by ELISA                                                       |
| Maple (2020) [47]            | Retrospective                           | United Kingdom | 2012              | Adult controls                                                                           | Controls: 124                                                                                                                  | Adults                        | Males, females | CMV IgG, EBNA-1 IgG, and EBV VCA IgG were detected and quantified by ELISA                                                     |

|                         |                      |                |                   |                                                                                                                          |                                                                                                                                   |                                 |                |                                                                               |
|-------------------------|----------------------|----------------|-------------------|--------------------------------------------------------------------------------------------------------------------------|-----------------------------------------------------------------------------------------------------------------------------------|---------------------------------|----------------|-------------------------------------------------------------------------------|
| Abdel Hamid (2011) [45] | Unclear <sup>b</sup> | United Kingdom | 2011 <sup>a</sup> | British neonates, children, adults                                                                                       | Age- Less than 2 weeks: 176; 2 weeks to 5 years: 451; 6 to 10 years: 211; 25 years to 35 years: 125                               | <2 weeks- 10 years; 25-35 years | NA             | Serum samples: EIA for CMV IgG and IgM<br>Urine samples: rapid culture method |
| <b>Latin America</b>    |                      |                |                   |                                                                                                                          |                                                                                                                                   |                                 |                |                                                                               |
| Tiguman (2020) [52]     | Cross-sectional      | Brazil         | 2016              | Adults that had previously participated in a major population-based survey carried out in the Manaus metropolitan region | Overall: 136<br>Nonwhite: 101<br>Health insurance-yes: 124<br>Malaria-yes: 132;<br>Dengue-Yes: 129<br>Epstein-Barr virus -No: 133 | ≥18 years                       | Males, females | Plasma samples were analyzed for anti-CMV IgG or IgM by ELISA                 |
| <b>North America</b>    |                      |                |                   |                                                                                                                          |                                                                                                                                   |                                 |                |                                                                               |
| Lamarre (2015) [43]     | Prospective cohort   | Canada         | 2010-2013         | Pregnant women; serum samples were collected during the first, second, and third trimesters, as                          | Overall: 1938<br>Age 17-29: 763;<br>age 30-34: 758;<br>age 35-47: 412<br>Marital status- Married or common law:                   | 17-47 years                     | Females        | Serum samples were assessed for anti-CMV IgG antibodies by ELISA              |

|  |  |  |  |                                                                                                                                                                                                                                                                                                                                                                                                                                                                                                                       |  |  |  |
|--|--|--|--|-----------------------------------------------------------------------------------------------------------------------------------------------------------------------------------------------------------------------------------------------------------------------------------------------------------------------------------------------------------------------------------------------------------------------------------------------------------------------------------------------------------------------|--|--|--|
|  |  |  |  | <p>well as at delivery</p> <p>1835; single or divorced: 101</p> <p>Occupation-<br/>Nurse or midwife: 166;<br/>other or unknown: 1713</p> <p>Education-<br/>Primary or secondary: 1911;<br/>post-secondary: 525; university: 1206</p> <p>Household income (CAD)-<br/>\$0-59,999: 557;<br/>\$60,000-99,999: 705; ≥\$100,000: 586</p> <p>Number of babies ever born-<br/>0: 1075; ≥1: 863</p> <p>Number of children still alive- 0: 1089; ≥1: 849</p> <p>First language-<br/>French or English: 1435;<br/>other: 501</p> |  |  |  |
|--|--|--|--|-----------------------------------------------------------------------------------------------------------------------------------------------------------------------------------------------------------------------------------------------------------------------------------------------------------------------------------------------------------------------------------------------------------------------------------------------------------------------------------------------------------------------|--|--|--|

|                                         |                 |        |      |                                                                                                                           |                                                                                                                                                                                                                                                                                                                                                                                         |             |             |                                                                                                                              |
|-----------------------------------------|-----------------|--------|------|---------------------------------------------------------------------------------------------------------------------------|-----------------------------------------------------------------------------------------------------------------------------------------------------------------------------------------------------------------------------------------------------------------------------------------------------------------------------------------------------------------------------------------|-------------|-------------|------------------------------------------------------------------------------------------------------------------------------|
|                                         |                 |        |      |                                                                                                                           | Country of birth-<br>Canada or USA:<br>1315; other: 620                                                                                                                                                                                                                                                                                                                                 |             |             |                                                                                                                              |
| Wizman<br>(2016)<br>[44]                | Prospective     | Canada | 2012 | Pregnant<br>women who<br>were<br>delivering at<br>Centre<br>Hospitalier<br>Universitaire<br>Sainte-Justine<br>in Montreal | Overall: 491<br><br>Age 18-30: 185;<br>age 31-35: 186;<br>age ≥36: 120<br><br>Born in Canada-<br>Yes: 272; No: 219<br><br>Education level-<br>Up to university:<br>188; university:<br>303<br><br>Family income-<br>Low: 101;<br>middle: 228;<br>high: 150<br><br>Other children-<br>0: 229; 1: 171<br><br>Daycare Yes:<br>218; no: 273<br><br>Employment-<br>None: 112;<br>others: 301 | >18 years   | Female<br>s | CMV serostatus was<br>identified in first<br>trimester blood samples<br>using an automated<br>enzyme immunoassay<br>analyzer |
| Alvarado-<br>Esquivel<br>(2014)<br>[39] | Cross-sectional | Mexico | 2013 | Pregnant<br>women in a<br>public primary<br>healthcare<br>center,                                                         | Overall: 343<br><br>Age 15-30: 198;<br>age 31-43: 144                                                                                                                                                                                                                                                                                                                                   | 15-43 years | Female<br>s | Cytomegalovirus IgM<br>and IgG kit                                                                                           |

|  |  |  |  |                             |                                                                                                                                                                                                                                                                                                                                                                                                                                                             |  |  |  |
|--|--|--|--|-----------------------------|-------------------------------------------------------------------------------------------------------------------------------------------------------------------------------------------------------------------------------------------------------------------------------------------------------------------------------------------------------------------------------------------------------------------------------------------------------------|--|--|--|
|  |  |  |  | residing in<br>Durango City | Birthplace<br>Durango State:<br>319<br><br>Residence place:<br>Durango State:<br>342<br><br>Residence area:<br>urban: 325<br><br>Educational<br>level- 7 to 12<br>years: 133; 13 or<br>more years: 209<br><br>Unemployed:<br>110; employed:<br>233<br><br>Medium socio-<br>economic level:<br>316<br><br>Month of<br>pregnancy- 1 to<br>3: 117; 4 to 6:<br>153<br><br>Deliveries-Yes:<br>140; No: 202<br><br>Pregnancies: 3 or<br>more: 228; 1 to<br>2: 115 |  |  |  |
|--|--|--|--|-----------------------------|-------------------------------------------------------------------------------------------------------------------------------------------------------------------------------------------------------------------------------------------------------------------------------------------------------------------------------------------------------------------------------------------------------------------------------------------------------------|--|--|--|

|                               |                 |        |           |                                                                                                                                                                                                   |                                                                                                                           |             |         |                             |
|-------------------------------|-----------------|--------|-----------|---------------------------------------------------------------------------------------------------------------------------------------------------------------------------------------------------|---------------------------------------------------------------------------------------------------------------------------|-------------|---------|-----------------------------|
|                               |                 |        |           |                                                                                                                                                                                                   | Cesarean sections-none: 241; 1 to 2: 101<br>No miscarriages: 269                                                          |             |         |                             |
| Alvarado-Esquivel (2017) [40] | Case-control    | Mexico | 2011-2013 | Pregnant women (24-42 weeks of pregnancy) suffering hypertensive disorders and proteinuria, attending the Department of Gynecology and Obstetrics of the General Hospital in Durango City, Mexico | Cases overall: 146; controls: 146                                                                                         | 15-39 years | Females | Cytomegalovirus IgG kit     |
| Alvarado-Esquivel (2018) [41] | Cross-sectional | Mexico | 2014-2016 | Pregnant women (1-9 months of pregnancy) were enrolled when attending their prenatal care consultations in 3 public health centers                                                                | Overall: 289<br>Age 20 or less: 126; age 21-30: 126<br>Ethnic group-Mestizo: 266<br>Birthplace: Aguascalientes State: 240 | 13-42 years | Females | ELFA, VIDAS CMV IgG and IgM |

|                                    |                          |               |                   |                                                                     |                                                                                                                                                                 |                                     |                |                                                                                                                                   |
|------------------------------------|--------------------------|---------------|-------------------|---------------------------------------------------------------------|-----------------------------------------------------------------------------------------------------------------------------------------------------------------|-------------------------------------|----------------|-----------------------------------------------------------------------------------------------------------------------------------|
|                                    |                          |               |                   |                                                                     | Residence area-<br>Urban: 206<br><br>Educational<br>level-7- 12 years:<br>225<br><br>Occupation-<br>Housewife: 230<br><br>High socio-<br>economic level:<br>220 |                                     |                |                                                                                                                                   |
| De la Tejera-Hernández (2015) [51] | Case-control             | Mexico        | 2013              | Enrolled dentistry students                                         | Overall: 176                                                                                                                                                    | Young adults (mean age: 21.5 years) | Males, females | Blood samples were assessed using a solid-phase, sequential chemiluminescent enzyme immunoassay                                   |
| Dollard (2011) [42]                | Observational (registry) | United States | 2011              | Women from the National Health and Nutrition Examination Survey III | Age 20-29: 1643; age 30-39: 1616; age 40-49: 1208                                                                                                               | 20-49 years                         | Females        | CMV IgG was measured in sera using enzyme immunoassay and VIDAS automated test; CMV IgM was measured in sera using the VIDAS test |
| Stowell (2014) [56]                | Cross-sectional          | United States | 2010 <sup>b</sup> | Children                                                            | Overall: 161                                                                                                                                                    | 0-47 months                         | Males, females | Serum was tested for anti-CMV IgG antibody; saliva and urine were tested for CMV DNA                                              |
| Styles 2020 [30]                   | Cross-sectional          | United States | 2013              | Adults in the Raleigh-Durham Chapel Hill metropolitan               | General: 694<br>Age 18-29: 206; 30-39: 138; 40-49: 130; 50-59:                                                                                                  | 18-85 years                         | Males, females | Serum samples were tested for IgG antibody response to CMV by ELISA                                                               |



|                      |                             |               |                      |                                                                                                                                                                                       |                                                                                                                                                                                                                                                                                                                                                                                                                                                           |           |                |                                                                |
|----------------------|-----------------------------|---------------|----------------------|---------------------------------------------------------------------------------------------------------------------------------------------------------------------------------------|-----------------------------------------------------------------------------------------------------------------------------------------------------------------------------------------------------------------------------------------------------------------------------------------------------------------------------------------------------------------------------------------------------------------------------------------------------------|-----------|----------------|----------------------------------------------------------------|
|                      |                             |               |                      | area in North Carolina                                                                                                                                                                | 152; males: 264; females: 430                                                                                                                                                                                                                                                                                                                                                                                                                             |           |                |                                                                |
| Petersen (2020) [55] | Retrospective data analysis | United States | 2011-2012; 2017-2018 | Children in 2011-2012 and 2017-2018; data were collected from the continuous National Health and Nutrition Examination Surveys conducted by the National Center for Health Statistics | <u>2011-2012 cohort</u><br>Non-Hispanic White: 119; Non-Hispanic Black: 229; All Hispanic: 254<br><br>Less than High School diploma: 209; GED, HS diploma, associate degree, some college: 347; College degree or more: 124<br><br>Family income to poverty ratio- Below poverty level (<1,0): 296; At or above poverty level (≥1,0): 358<br><br><u>2017-2018 cohort</u><br><br>Non-Hispanic White: 233; Non-Hispanic Black: 136; All Hispanic: 133; Non- | 1-5 years | Males, females | Serum samples were assessed for presence of CMV IgG antibodies |

|                      |                    |       |           |                                                                            |                                                                                                                                                                                                                                                   |             |                |                                                                                                                                 |
|----------------------|--------------------|-------|-----------|----------------------------------------------------------------------------|---------------------------------------------------------------------------------------------------------------------------------------------------------------------------------------------------------------------------------------------------|-------------|----------------|---------------------------------------------------------------------------------------------------------------------------------|
|                      |                    |       |           |                                                                            | <p>Hispanic other/multiracial : 104</p> <p>GED, HS diploma, associate degree, some college: 348; College degree or more: 130</p> <p>Family income to poverty ratio- Below poverty level (&lt;1,0): 188; At or above poverty level (≥1,0): 356</p> |             |                |                                                                                                                                 |
|                      | <b>Japan</b>       |       |           |                                                                            |                                                                                                                                                                                                                                                   |             |                |                                                                                                                                 |
| Toriyabe (2017) [31] | Prospective cohort | Japan | 2013-2015 | Pregnant women (first trimester) with confirmed maternal primary infection | First trimester: 8469                                                                                                                                                                                                                             | 16-45 years | Females        | ELISA (IgM and IgG), RT-PCR of CMV DNA; performed on either a neonatal urine sample (< 1 week of life) or amniotic fluid sample |
| Takemoto (2016) [50] | Observational      | Japan | 2013      | Neonates (born at ≥36 weeks of gestation)                                  | Overall: 561                                                                                                                                                                                                                                      | Neonates    | Males, females | Umbilical cord blood was assessed for anti-CMV IgG antibodies by EIA                                                            |

|                   |                    |       |           |                                                     |                                                               |                      |                |                                            |
|-------------------|--------------------|-------|-----------|-----------------------------------------------------|---------------------------------------------------------------|----------------------|----------------|--------------------------------------------|
| Takao (2020) [49] | Prospective cohort | Japan | 2013-2018 | Healthcare workers at the Osaka University Hospital | Overall: 1153; medical doctors: 386; nurses: 468; others: 299 | Median age: 36 years | Males, females | Serum samples were tested for anti-CMV IgG |
|-------------------|--------------------|-------|-----------|-----------------------------------------------------|---------------------------------------------------------------|----------------------|----------------|--------------------------------------------|

CMV, cytomegalovirus; EBNA-1, Epstein–Barr virus nuclear antigen 1; EBV, Epstein-Barr Virus; EIA, enzyme immunoassay; ELFA, enzyme-linked fluorescent assay; ELISA, enzyme-linked immunosorbent assay; IgG, immunoglobulin G; IgM, immunoglobulin M; NA, not available; RT-PCR, reverse transcription polymerase chain reaction.

<sup>a</sup>Publication date.

<sup>b</sup>Unclear information.
